# Supplementary material for: The catalytic performance of (ZrO)n (n = 1–4, 12) clusters for Suzuki–Miyaura cross-coupling: a DFT study
Source: Royal Society of Chemistry journal article supplement (doi:10.1039/d4dt01955e), 2024-01-01
Supplement: d4dt01955e1.pdf [file d4dt01955e1.pdf]

Electronic Supplementary Information for

**On the catalytic performance of  $(\text{ZrO})_n$  ( $n = 1-4, 12$ ) clusters for  
Suzuki-Miyaura cross-coupling: A DFT study**

Zhi-Chao Zhang,<sup>a</sup> Wen-Lu Wang,<sup>a</sup> Hai-Yan Zhong,<sup>a</sup> Bin Liu,<sup>a</sup> Xin-Yu Shi,<sup>a</sup> Dan Yu,<sup>b</sup>  
Wei-Ming Sun<sup>\*a,c</sup>

<sup>a</sup>*Fujian Key Laboratory of Drug Target Discovery and Structural and Functional Research, Higher Educational Key Laboratory for Nano Biomedical Technology of Fujian Province, The School of Pharmacy, Fujian Medical University, Fuzhou, Fujian, 350122, People's Republic of China.*

*E-mail address: sunwm@fjmu.edu.cn*

<sup>b</sup>*School of Environmental Science and Engineering, Guangzhou University, Guangzhou, Guangdong, 510006, People's Republic of China*

<sup>c</sup>*School of Chemistry and Materials Science, University of Science and Technology of China, Hefei, Anhui, 230026, People's Republic of China*

## Table of Contents

|                                                                                                                                           |            |
|-------------------------------------------------------------------------------------------------------------------------------------------|------------|
| <b>1. Tables</b> .....                                                                                                                    | <b>S3</b>  |
| <b>Table S1.</b> $E_b$ and $E_g$ values of $(ZrO)_n$ ( $n = 1-4, 12$ ) and $Pd_n$ ( $n = 1-4, 12$ ) .....                                 | <b>S3</b>  |
| <b>Table S2.</b> Fukui function and dual descriptor values of orbital weights for each atom of $(ZrO)_n$ ( $n = 1-4$ ) .....              | <b>S4</b>  |
| <b>Table S3.</b> NPA charges on the $(ZrO)_n$ ( $n = 1-4$ ) subunits during the transmetalation step .....                                | <b>S5</b>  |
| <b>Table S4.</b> Fukui function and dual descriptor values of orbital weights for each atom of $(ZrO)_{12}$ .....                         | <b>S6</b>  |
| <b>2. Figures</b> .....                                                                                                                   | <b>S7</b>  |
| <b>Figure S1.</b> Schematic diagram of possible mechanisms and energy profile of Suzuki-Miyaura reaction catalyzed by $Pd(PPh_3)_2$ ..... | <b>S7</b>  |
| <b>Figure S2.</b> Gibbs free energy profile of Suzuki reaction catalyzed by $Pd$ .....                                                    | <b>S8</b>  |
| <b>Figure S3.</b> Gibbs free energy profile of Suzuki reaction catalyzed by $Pd_2$ .....                                                  | <b>S9</b>  |
| <b>Figure S4.</b> Gibbs free energy profile of Suzuki reaction catalyzed by $Pd_3$ .....                                                  | <b>S10</b> |
| <b>Figure S5.</b> Gibbs free energy profile of Suzuki reaction catalyzed by $Pd_4$ .....                                                  | <b>S11</b> |
| <b>Figure S6.</b> Optimized structures of $(ZrO)_n$ ( $n = 1-4$ ) with spin multiplicities .....                                          | <b>S12</b> |
| <b>Figure S7.</b> ESP, Fukui function, and dual descriptor values of orbital weights plots of $(ZrO)_n$ ( $n = 1-4$ ) .....               | <b>S13</b> |
| <b>Figure S8.</b> Time evolution of the potential energies and structures of $(ZrO)_{12}$ .....                                           | <b>S14</b> |
| <b>Figure S9.</b> Optimized structures of $Pd_{12}$ and Gibbs free energy profile of Suzuki reaction catalyzed by $Pd_{12}$ .....         | <b>S15</b> |
| <b>3. Cartesian coordinates</b> .....                                                                                                     | <b>S16</b> |

## 1. Tables

**Table S1** Binding energy ( $E_b$ , in eV) and energy gap ( $E_g$ , in eV) values of  $(\text{ZrO})_n$  ( $n = 1-4, 12$ ) and  $\text{Pd}_n$  ( $n = 1-4, 12$ ) clusters at the PBE0/Def2-TZVP level.

| Clusters            | $E_b$ | $E_g$ |
|---------------------|-------|-------|
| ZrO                 | ---   | 3.12  |
| $(\text{ZrO})_2$    | 1.66  | 2.29  |
| $(\text{ZrO})_3$    | 2.58  | 2.12  |
| $(\text{ZrO})_4$    | 3.30  | 1.95  |
| $(\text{ZrO})_{12}$ | 4.21  | 1.49  |
| Pd                  | ---   | 3.03  |
| $\text{Pd}_2$       | 0.51  | 3.15  |
| $\text{Pd}_3$       | 0.86  | 2.17  |
| $\text{Pd}_4$       | 1.31  | 2.15  |
| $\text{Pd}_{12}$    | 1.97  | 1.71  |

**Table S2** Fukui function and dual descriptor values of orbital weights for each atom of  $(\text{ZrO})_n$  ( $n = 1-4$ ) clusters (in  $|e|$ ).

| Clusters         | Atoms | $f^+$ | $DD$   |
|------------------|-------|-------|--------|
| ZrO              | 1(Zr) | 0.921 | 0.035  |
|                  | 2(O)  | 0.079 | -0.035 |
| $(\text{ZrO})_2$ | 1(Zr) | 0.438 | -0.065 |
|                  | 2(Zr) | 0.511 | 0.095  |
|                  | 3(O)  | 0.026 | -0.015 |
|                  | 4(O)  | 0.026 | -0.015 |
| $(\text{ZrO})_3$ | 1(Zr) | 0.200 | -0.079 |
|                  | 2(Zr) | 0.369 | 0.058  |
|                  | 3(Zr) | 0.371 | 0.060  |
|                  | 4(O)  | 0.021 | -0.011 |
|                  | 5(O)  | 0.017 | -0.017 |
|                  | 6(O)  | 0.022 | -0.011 |
| $(\text{ZrO})_4$ | 1(Zr) | 0.174 | -0.001 |
|                  | 2(Zr) | 0.235 | -0.022 |
|                  | 3(O)  | 0.015 | -0.015 |
|                  | 4(O)  | 0.015 | -0.015 |
|                  | 5(O)  | 0.017 | -0.020 |
|                  | 6(Zr) | 0.265 | 0.049  |
|                  | 7(Zr) | 0.265 | 0.049  |
|                  | 8(O)  | 0.013 | -0.025 |

**Table S3** NPA charges on the  $(\text{ZrO})_n$  ( $n = 1-4$ ) subunits of **IS2** and **TS2** during the transmetalation step (in  $|e|$ ).

| Clusters         | $Q_{\text{IS2}}$ | $Q_{\text{TS2}}$ | $\Delta Q$ |
|------------------|------------------|------------------|------------|
| ZrO              | 0.939            | 0.997            | 0.058      |
| $(\text{ZrO})_2$ | 1.633            | 1.500            | -0.133     |
| $(\text{ZrO})_3$ | 1.171            | 1.084            | -0.087     |
| $(\text{ZrO})_4$ | 1.811            | 1.549            | -0.262     |

**Table S4** Fukui function and dual descriptor values of orbital weights for each atom of (ZrO)<sub>12</sub> cluster (in |e|).

| Cluster             | Atoms  | $f^+$  | $DD$   |
|---------------------|--------|--------|--------|
| (ZrO) <sub>12</sub> | 1(Zr)  | 0.120  | 0.048  |
|                     | 2(Zr)  | 0.073  | 0.001  |
|                     | 3(Zr)  | 0.053  | -0.013 |
|                     | 4(Zr)  | 0.094  | 0.019  |
|                     | 5(Zr)  | 0.053  | -0.007 |
|                     | 6(Zr)  | 0.073  | 0.001  |
|                     | 7(Zr)  | 0.148  | 0.054  |
|                     | 8(Zr)  | 0.120  | 0.049  |
|                     | 9(Zr)  | 0.087  | 0.012  |
|                     | 10(Zr) | 0.054  | -0.005 |
|                     | 11(Zr) | 0.054  | -0.012 |
|                     | 12(Zr) | 0.034  | -0.059 |
|                     | 13(O)  | 0.003  | -0.009 |
|                     | 14(O)  | 0.006  | -0.003 |
|                     | 15(O)  | 0.006  | -0.003 |
|                     | 16(O)  | -0.003 | -0.013 |
|                     | 17(O)  | -0.003 | -0.013 |
|                     | 18(O)  | 0.003  | -0.009 |
|                     | 19(O)  | 0.003  | -0.005 |
|                     | 20(O)  | 0.005  | -0.006 |
|                     | 21(O)  | 0.004  | -0.005 |
|                     | 22(O)  | 0.005  | -0.005 |
|                     | 23(O)  | 0.004  | -0.008 |
|                     | 24(O)  | 0.004  | -0.008 |

## 2. Figures

**Figure S1** (a) Schematic diagram of possible mechanisms and (b) Gibbs free energy profile of Suzuki-Miyaura reaction catalyzed by  $\text{Pd}(\text{PPh}_3)_2$ . The spin multiplicities are given as superscript and the related bond lengths are given in Å, while paths **I** and **II** refers to whether the  $\text{B}(\text{OH})_3$  is removed or not during the reduction elimination step in b.

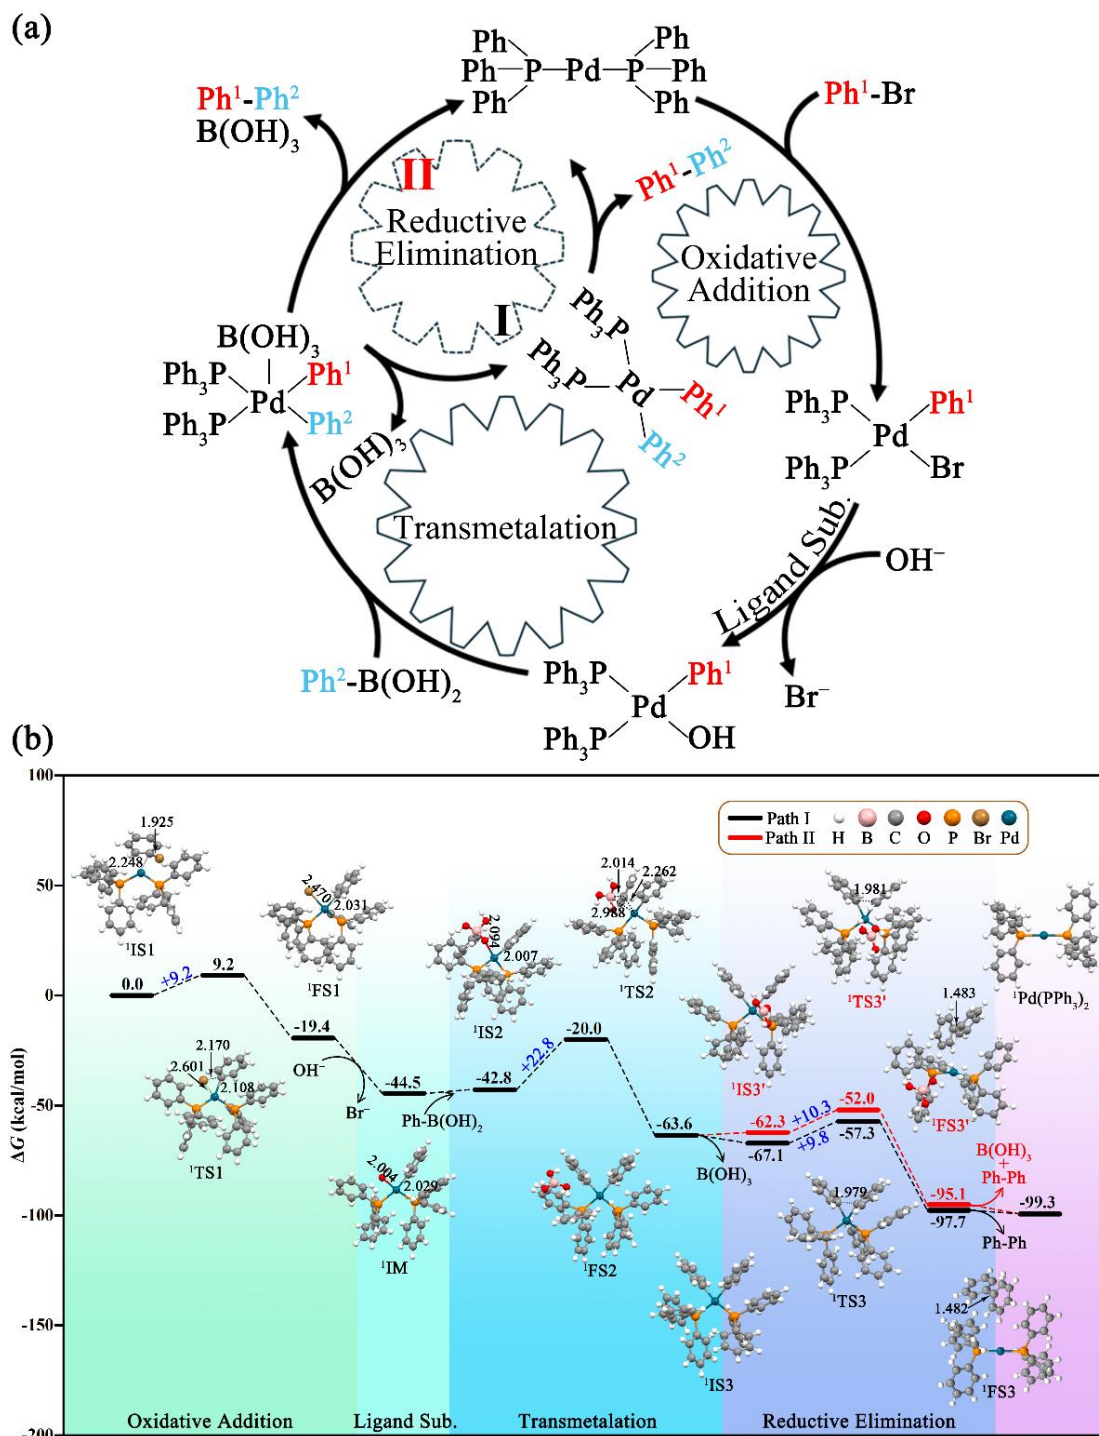

**Figure S2** Gibbs free energy profile of Suzuki-Miyaura reaction catalyzed by Pd with corresponding geometric structures, where the spin multiplicities of each structure are indicated by the superscripts and crucial bond lengths are given in Å, while paths **I** and **II** refers to whether the B(OH)<sub>3</sub> is removed or not during the reduction elimination step.

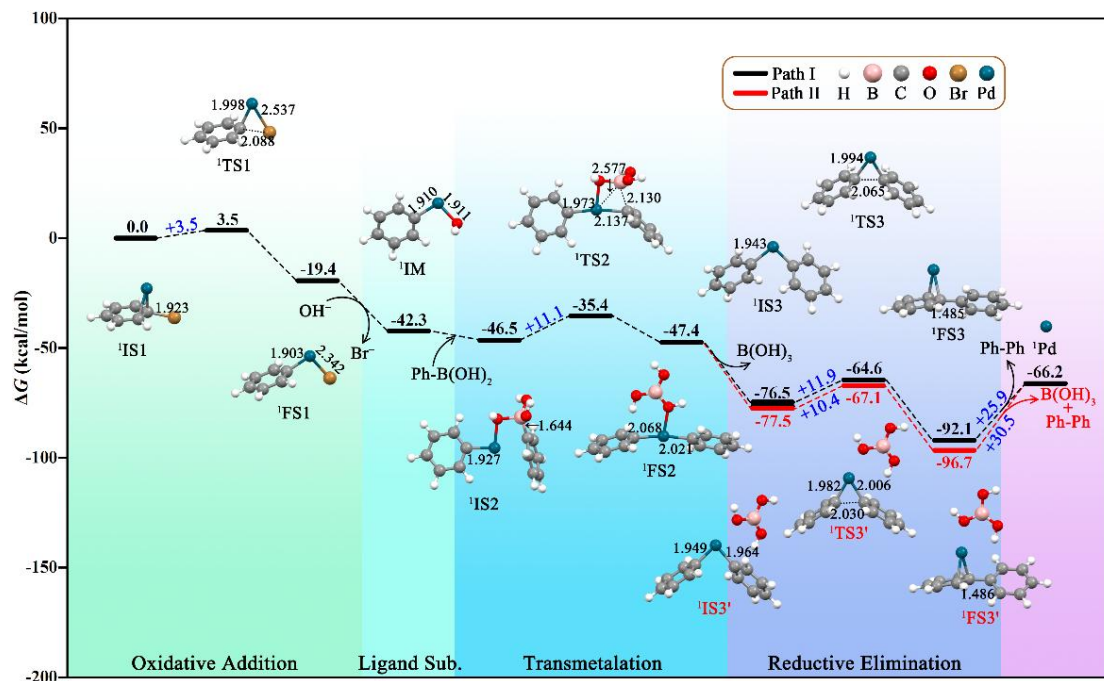



**Figure S3** Gibbs free energy profile of Suzuki-Miyaura reaction catalyzed by Pd<sub>2</sub> with corresponding geometric structures, where the spin multiplicities of each structure are indicated by the superscripts and crucial bond lengths are given in Å, while paths **I** and **II** refers to whether the B(OH)<sub>3</sub> is removed or not during the reduction elimination step.

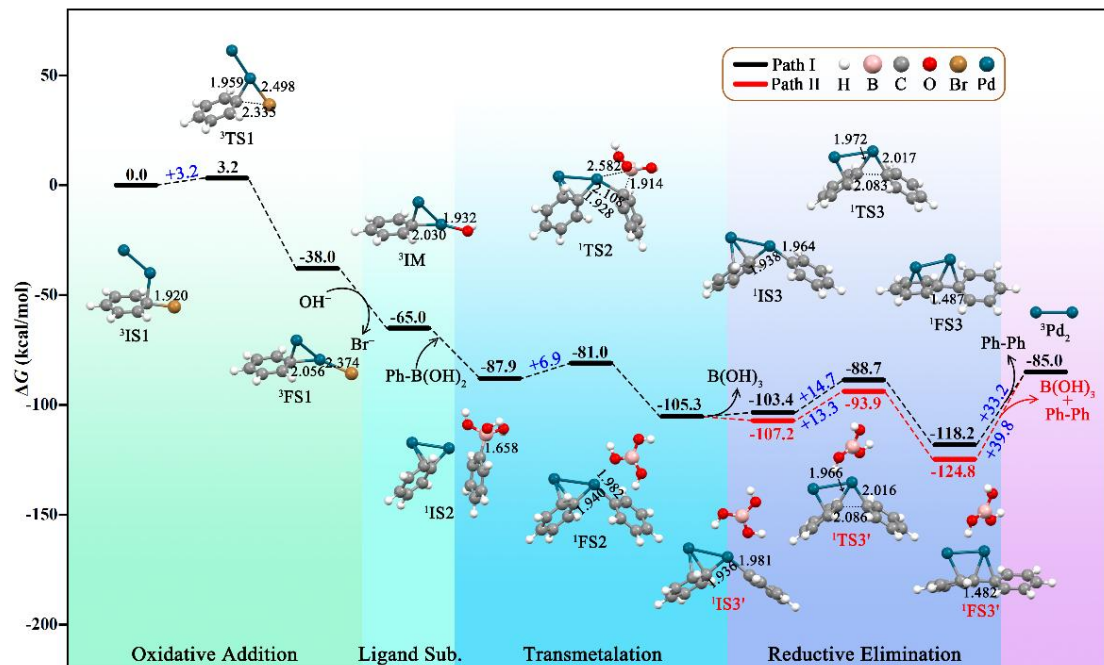

**Figure S4** Gibbs free energy profile of Suzuki-Miyaura reaction catalyzed by Pd<sub>3</sub> with corresponding geometric structures, where the spin multiplicities of each structure are indicated by the superscripts and crucial bond lengths are given in Å, while paths **I** and **II** refers to whether the B(OH)<sub>3</sub> is removed or not during the reduction elimination step.

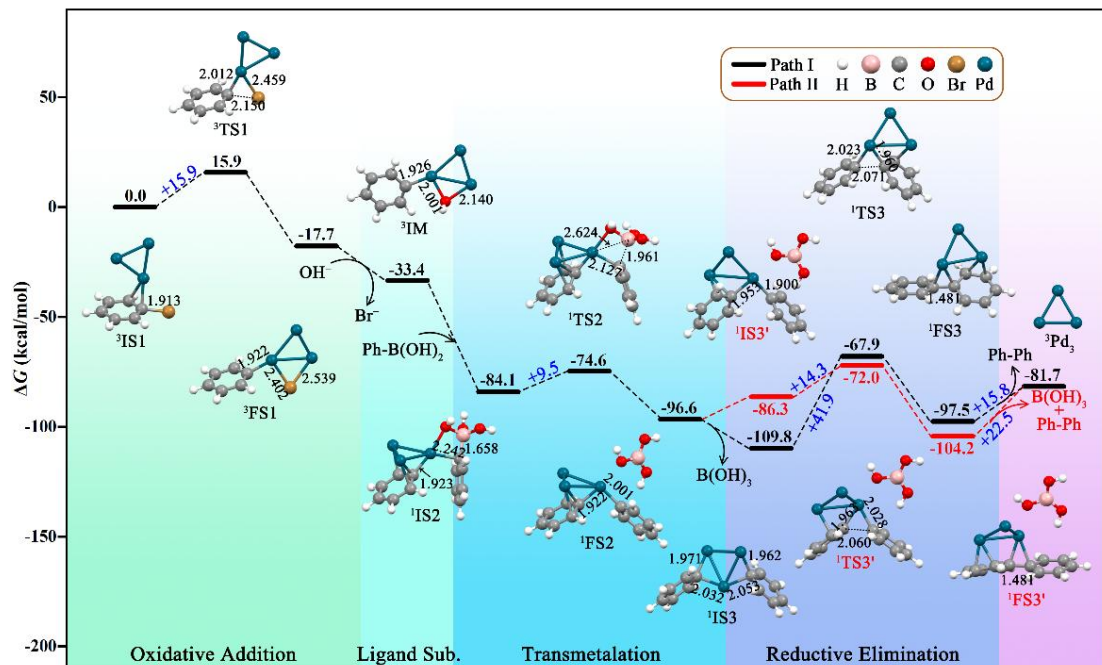

**Figure S5** Gibbs free energy profile of Suzuki-Miyaura reaction catalyzed by Pd<sub>4</sub> with corresponding geometric structures, where the spin multiplicities of each structure are indicated by the superscripts and crucial bond lengths are given in Å, while paths **I** and **II** refers to whether the B(OH)<sub>3</sub> is removed or not during the reduction elimination step.

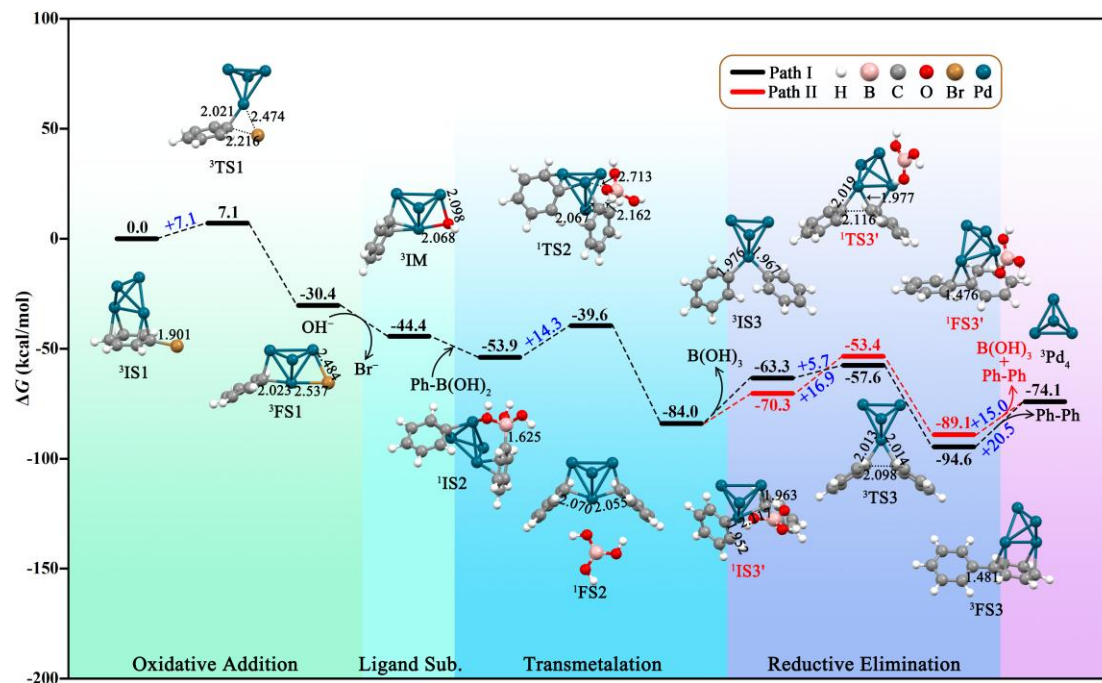

**Figure S6** The optimized structures of  $(\text{ZrO})_n$  ( $n = 1-4$ ) with different spin multiplicities, symmetric point groups, and relative energies ( $E_{\text{rel}}$ , in eV).

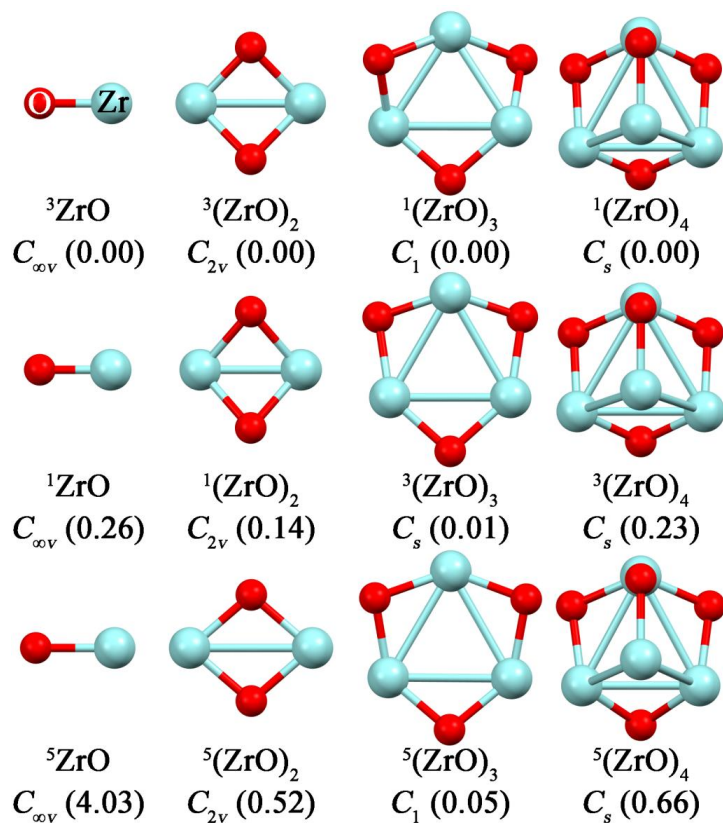

**Figure S7** (a) ESP plots as well as (b) Fukui function and dual descriptor values of orbital weights plot of  $(\text{ZrO})_n$  ( $n = 1-4$ ) (Isovalue = 0.002 a.u.), where cyan and yellow spheres represent the minima and maxima of the surface electrostatic potential in **a**, and the green and blue regions indicate the positive and negative values in **b**, respectively.

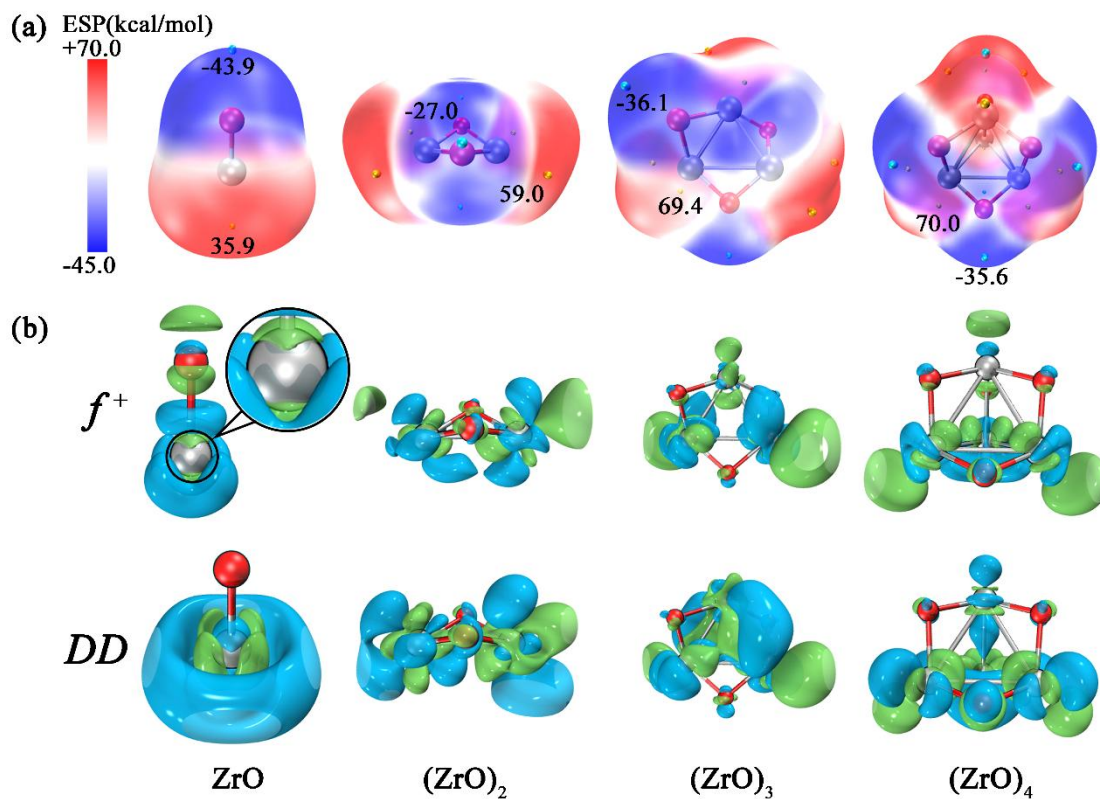

**Figure S8** Time evolution of the potential energies and structures of  $(\text{ZrO})_{12}$  during the full length of 150 fs ADMP MD simulation.

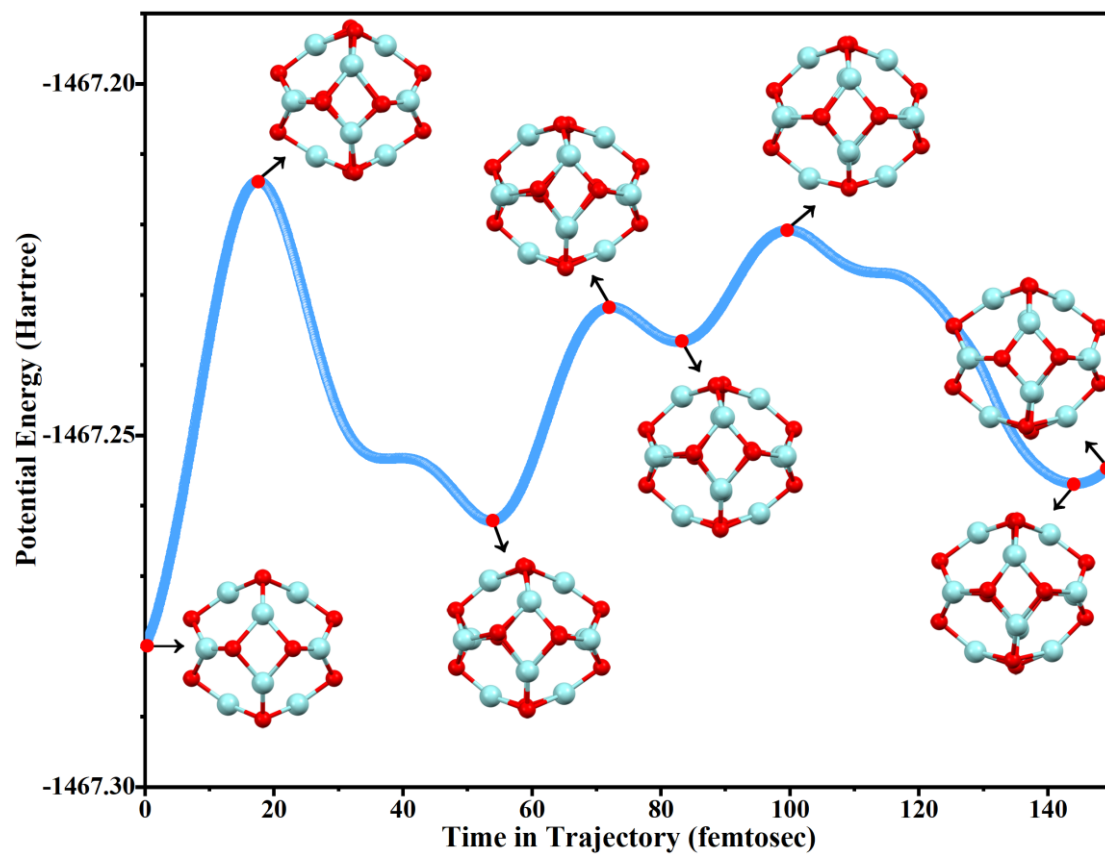

**Figure S9** (a) Optimized structure of Pd<sub>12</sub> and (b) Gibbs free energy profile of Suzuki-Miyaura reaction catalyzed by Pd<sub>12</sub> with corresponding geometric structures, where the spin multiplicities of each structure are indicated by the superscripts and crucial bond lengths are given in Å, while paths **I** and **II** refers to whether the B(OH)<sub>3</sub> is removed or not during the reduction elimination step.

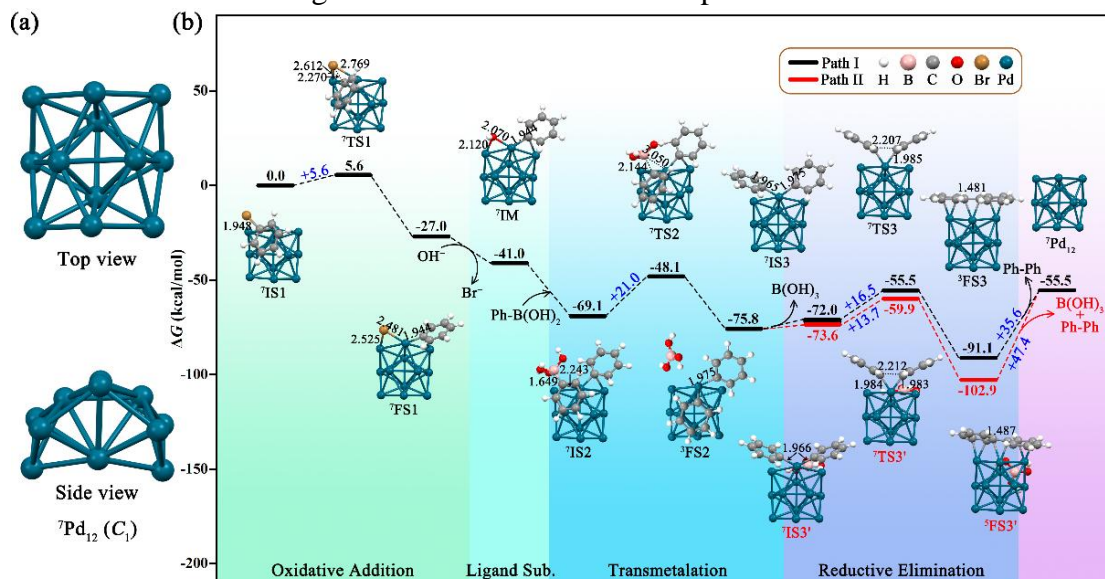

### 3. Cartesian Coordinates

(1) The optimized structures of  $(\text{ZrO})_n$  ( $n = 1-4$ , and 12) and  $\text{Pd}_n$  ( $n = 1-4$ , and 12)

#### ZrO

|    |            |            |             |
|----|------------|------------|-------------|
| Zr | 0.00000000 | 0.00000000 | 0.28715900  |
| O  | 0.00000000 | 0.00000000 | -1.43579500 |

#### (ZrO)<sub>2</sub>

|    |             |             |             |
|----|-------------|-------------|-------------|
| Zr | 0.00000000  | 1.30727200  | -0.09000300 |
| Zr | 0.00000000  | -1.30727200 | -0.09000300 |
| O  | -1.34091900 | 0.00000000  | 0.45001500  |
| O  | 1.34091900  | 0.00000000  | 0.45001500  |

#### (ZrO)<sub>3</sub>

|    |             |             |             |
|----|-------------|-------------|-------------|
| Zr | 0.00194000  | 1.52604000  | 0.00018400  |
| Zr | -1.47064300 | -0.73217100 | -0.19505700 |
| Zr | 1.46867500  | -0.73536500 | 0.19469100  |
| O  | -1.71732600 | 0.86461800  | 0.83329700  |
| O  | -0.00208500 | -2.01903300 | 0.00093300  |
| O  | 1.71954900  | 0.86189300  | -0.83332500 |

#### (ZrO)<sub>4</sub>

|    |             |             |             |
|----|-------------|-------------|-------------|
| Zr | 0.26393600  | 1.72499700  | 0.00000000  |
| Zr | 1.65799100  | -0.79925300 | 0.00000000  |
| O  | -0.80883800 | 1.23434100  | 1.56930700  |
| O  | -0.80883800 | 1.23434100  | -1.56930700 |
| O  | 2.12553800  | 1.09496000  | 0.00000000  |
| Zr | -0.80883800 | -0.71265100 | 1.47609200  |
| Zr | -0.80883800 | -0.71265100 | -1.47609200 |
| O  | -2.02911400 | -1.06585200 | 0.00000000  |

#### (ZrO)<sub>12</sub>

|    |             |             |             |
|----|-------------|-------------|-------------|
| Zr | 0.00000000  | -1.54397000 | 2.49960600  |
| Zr | 0.00000000  | 1.54397000  | 2.49960600  |
| Zr | 2.49960600  | 0.00000000  | 1.54397000  |
| Zr | 1.54397000  | 2.49960600  | 0.00000000  |
| Zr | 2.49960600  | 0.00000000  | -1.54397000 |
| Zr | 0.00000000  | 1.54397000  | -2.49960600 |
| Zr | 1.54397000  | -2.49960600 | 0.00000000  |
| Zr | 0.00000000  | -1.54397000 | -2.49960600 |
| Zr | -1.54397000 | -2.49960600 | 0.00000000  |
| Zr | -2.49960600 | 0.00000000  | -1.54397000 |
| Zr | -2.49960600 | 0.00000000  | 1.54397000  |
| Zr | -1.54397000 | 2.49960600  | 0.00000000  |
| O  | -1.33976400 | 0.00000000  | 3.16933100  |



|                        |             |             |             |
|------------------------|-------------|-------------|-------------|
| O                      | -3.16933100 | 1.33976400  | 0.00000000  |
| O                      | -3.16933100 | -1.33976400 | 0.00000000  |
| O                      | 0.00000000  | -3.16933100 | 1.33976400  |
| O                      | 0.00000000  | -3.16933100 | -1.33976400 |
| O                      | -1.33976400 | 0.00000000  | -3.16933100 |
| O                      | 3.16933100  | -1.33976400 | 0.00000000  |
| O                      | 0.00000000  | 3.16933100  | -1.33976400 |
| O                      | 3.16933100  | 1.33976400  | 0.00000000  |
| O                      | 0.00000000  | 3.16933100  | 1.33976400  |
| O                      | 1.33976400  | 0.00000000  | 3.16933100  |
| O                      | 1.33976400  | 0.00000000  | -3.16933100 |
| <b>Pd</b>              |             |             |             |
| Pd                     | 0.00000000  | 0.00000000  | 0.00000000  |
| <b>Pd<sub>2</sub></b>  |             |             |             |
| Pd                     | 0.00000000  | 0.00000000  | 1.24316700  |
| Pd                     | 0.00000000  | 0.00000000  | -1.24316700 |
| <b>Pd<sub>3</sub></b>  |             |             |             |
| Pd                     | 0.00000000  | 0.00000000  | 1.46963500  |
| Pd                     | 0.00000000  | -1.25963900 | -0.73481800 |
| Pd                     | 0.00000000  | 1.25963900  | -0.73481800 |
| <b>Pd<sub>4</sub></b>  |             |             |             |
| Pd                     | 0.00000000  | -1.26520900 | -0.97338500 |
| Pd                     | 1.26520900  | 0.00000000  | 0.97338500  |
| Pd                     | 0.00000000  | 1.26520900  | -0.97338500 |
| Pd                     | -1.26520900 | 0.00000000  | 0.97338500  |
| <b>Pd<sub>12</sub></b> |             |             |             |
| Pd                     | 2.79333500  | 1.53407200  | 0.09850700  |
| Pd                     | 0.35502100  | 2.35881000  | 1.44679700  |
| Pd                     | -1.67668600 | 2.63144200  | -0.31704400 |
| Pd                     | -2.11835600 | 0.42461900  | -1.61122500 |
| Pd                     | -2.76078800 | -1.66021500 | -0.09260700 |
| Pd                     | -0.71917200 | -2.11045900 | 1.52975200  |
| Pd                     | 1.82328000  | -2.50160600 | 0.16012500  |
| Pd                     | 2.49047800  | -0.55901800 | -1.41416700 |
| Pd                     | 1.10681800  | -0.17950200 | 1.14057900  |
| Pd                     | -1.54231800 | 0.39219700  | 1.09499300  |
| Pd                     | 0.46186100  | 1.14625800  | -0.98796400 |
| Pd                     | -0.21347300 | -1.47659800 | -1.04774800 |

(2) The optimized structures of PhBr@(ZrO)<sub>n</sub> (n = 1-4, 12)

Isomer II of PhBr@ZrO

|    |             |             |             |
|----|-------------|-------------|-------------|
| Zr | 2.22197500  | 0.34541900  | -0.42652800 |
| O  | 2.33865500  | 1.41703100  | 0.93037100  |
| C  | -2.71172300 | 1.78190800  | 0.25950300  |
| C  | -1.52864600 | 1.07363600  | 0.42297200  |
| C  | -1.52961500 | -0.27023900 | 0.10493900  |
| C  | -2.64654000 | -0.93316600 | -0.36279100 |
| C  | -3.81920700 | -0.20604800 | -0.52088800 |
| C  | -3.85158300 | 1.14595900  | -0.21131100 |
| H  | -2.73681300 | 2.83711900  | 0.50575900  |
| H  | -0.62798300 | 1.55377300  | 0.79143400  |
| H  | -2.60905500 | -1.98905600 | -0.60093500 |
| H  | -4.70882400 | -0.70358600 | -0.88964100 |
| H  | -4.77035900 | 1.70658200  | -0.33695100 |
| Br | 0.12539100  | -1.26028900 | 0.34268400  |

Isomer II of PhBr@(ZrO)<sub>2</sub>

|    |             |             |             |
|----|-------------|-------------|-------------|
| Zr | -1.07214700 | 2.77834500  | 0.00000000  |
| Zr | 0.83767300  | 1.22219400  | 0.00000000  |
| O  | 0.26411000  | 2.52437000  | 1.39668800  |
| O  | 0.26411000  | 2.52437000  | -1.39668800 |
| C  | 0.26411000  | -4.07172000 | 0.00000000  |
| C  | -0.05339000 | -2.72972700 | 0.00000000  |
| C  | -1.34190500 | -2.25484100 | 0.00000000  |
| C  | -2.37541400 | -3.18230800 | 0.00000000  |
| C  | -2.09736300 | -4.54209000 | 0.00000000  |
| C  | -0.78219600 | -4.98559500 | 0.00000000  |
| H  | 1.29581400  | -4.40428700 | 0.00000000  |
| H  | -1.53347200 | -1.18036300 | 0.00000000  |
| H  | -3.40269600 | -2.83418900 | 0.00000000  |
| H  | -2.90884400 | -5.26056100 | 0.00000000  |
| H  | -0.56370600 | -6.04759300 | 0.00000000  |
| Br | 1.44523000  | -1.43105200 | 0.00000000  |

Isomer II of PhBr@(ZrO)<sub>3</sub>

|    |             |             |             |
|----|-------------|-------------|-------------|
| Zr | 1.67903000  | 0.81698500  | 1.37547300  |
| Zr | 0.69034000  | -1.36906500 | 0.04620900  |
| Zr | 2.41361200  | 0.64251800  | -1.23669200 |
| O  | 1.44156000  | -1.12146300 | 1.81724600  |
| O  | 1.56156700  | -1.07079100 | -1.69332600 |
| O  | 1.81657500  | 2.12184700  | -0.15490800 |
| C  | -4.46020600 | -0.01034400 | -0.16645100 |
| C  | -3.08676300 | 0.09269600  | -0.08878700 |

|    |             |             |             |
|----|-------------|-------------|-------------|
| C  | -2.41388100 | 1.28838700  | -0.06684300 |
| C  | -3.16392400 | 2.45563200  | -0.12434300 |
| C  | -4.54838500 | 2.39642500  | -0.19781800 |
| C  | -5.19402300 | 1.16784200  | -0.21726300 |
| H  | -4.95125700 | -0.97609200 | -0.18611300 |
| H  | -1.32372300 | 1.30024600  | 0.00225700  |
| H  | -2.65565300 | 3.41366300  | -0.11397900 |
| H  | -5.12815200 | 3.31108300  | -0.24185500 |
| H  | -6.27561900 | 1.11939100  | -0.27286700 |
| Br | -2.06684000 | -1.58761100 | -0.03343300 |

Isomer **II** of PhBr@(ZrO)<sub>4</sub>

|    |             |             |             |
|----|-------------|-------------|-------------|
| Zr | -1.70676000 | -1.71876000 | -0.61834200 |
| Zr | 0.59861900  | 0.40874200  | -0.88428000 |
| O  | -3.18580100 | -0.42396800 | -1.04712600 |
| O  | -1.14552100 | -2.05992500 | 1.25931600  |
| O  | -0.18630000 | -1.27385600 | -1.72081600 |
| Zr | -2.38052100 | 1.19492000  | -0.30743700 |
| Zr | -0.61824000 | -0.17651100 | 1.65218300  |
| O  | -2.14637100 | 1.12910000  | 1.62602900  |
| C  | 2.86194500  | 1.39328200  | -1.01574000 |
| C  | 2.81758000  | 0.53241800  | 0.08649500  |
| C  | 1.83836300  | 0.61141600  | 1.12471300  |
| C  | 0.94939600  | 1.79132700  | 1.06386400  |
| C  | 1.06911700  | 2.72854300  | -0.00388100 |
| C  | 1.94033800  | 2.49492800  | -1.07865100 |
| H  | 3.59255000  | 1.24174400  | -1.80151200 |
| H  | 2.07566900  | 0.15658700  | 2.09170500  |
| H  | 0.43350000  | 2.11751600  | 1.97523500  |
| H  | 0.41590300  | 3.59527900  | -0.01806700 |
| H  | 1.99356000  | 3.18708200  | -1.91106200 |
| Br | 4.00618400  | -0.99760500 | 0.11367800  |

Isomer **III** of PhBr@(ZrO)<sub>4</sub>

|    |             |             |             |
|----|-------------|-------------|-------------|
| Zr | 2.52891200  | -0.23707700 | -1.48469000 |
| Zr | -0.14532400 | 0.45791900  | -0.44801800 |
| O  | 2.50191800  | -2.01071700 | -0.61649700 |
| O  | 3.42283900  | 1.08999000  | -0.33312500 |
| O  | 0.80741300  | 0.33220100  | -2.17951700 |
| Zr | 1.32598400  | -1.69875500 | 0.89866300  |
| Zr | 2.17771700  | 1.21577500  | 1.15823900  |
| O  | 2.29064200  | -0.49244900 | 2.07997100  |
| C  | -5.44823300 | 0.65423700  | -0.05021400 |
| C  | -4.17108100 | 0.14329200  | 0.04164500  |

|    |             |             |             |
|----|-------------|-------------|-------------|
| C  | -3.90124100 | -1.20438200 | 0.07722500  |
| C  | -4.97004400 | -2.08898600 | 0.01697000  |
| C  | -6.26939300 | -1.60976800 | -0.07741300 |
| C  | -6.50785500 | -0.24290200 | -0.11064800 |
| H  | -5.62165900 | 1.72414300  | -0.07616900 |
| H  | -2.87283400 | -1.55783600 | 0.14923600  |
| H  | -4.78316800 | -3.15723100 | 0.04349000  |
| H  | -7.10014000 | -2.30419200 | -0.12614200 |
| H  | -7.52275900 | 0.13182600  | -0.18559100 |
| Br | -2.63332600 | 1.43964800  | 0.12101100  |

Isomer IV of PhBr@(ZrO)<sub>4</sub>

|    |             |             |             |
|----|-------------|-------------|-------------|
| Zr | 0.44862500  | -0.18846900 | -0.14697700 |
| Zr | -1.72036000 | -0.39339000 | 1.76080600  |
| O  | -0.07406000 | 1.64525000  | -0.64228100 |
| O  | -0.48387200 | -1.33889700 | -1.44383000 |
| O  | 0.20693300  | -0.64067900 | 1.78186300  |
| Zr | -1.97231800 | 1.69402700  | -0.19338900 |
| Zr | -2.35743900 | -1.12840100 | -0.94405600 |
| O  | -2.76878700 | 0.64711800  | -1.63088100 |
| C  | 3.68480900  | 0.76530100  | -1.19001500 |
| C  | 3.27709000  | 0.08155200  | -0.04797200 |
| C  | 3.00547800  | 0.74191600  | 1.14728800  |
| C  | 3.11340200  | 2.12866800  | 1.17288700  |
| C  | 3.50504300  | 2.82630500  | 0.04348200  |
| C  | 3.79473100  | 2.14332300  | -1.13228800 |
| H  | 3.90120000  | 0.22442500  | -2.10234900 |
| H  | 2.69915400  | 0.18813500  | 2.02601300  |
| H  | 2.88445700  | 2.65551300  | 2.09139200  |
| H  | 3.58170900  | 3.90623700  | 0.07353800  |
| H  | 4.09965800  | 2.68764900  | -2.01808100 |
| Br | 3.13052800  | -1.81821100 | -0.10300300 |

Isomer I of PhBr@(ZrO)<sub>12</sub>

|    |             |             |             |
|----|-------------|-------------|-------------|
| Zr | 1.52365700  | -1.58332400 | -2.38191800 |
| Zr | 1.31804100  | -2.88815000 | 0.37474800  |
| Zr | 3.51587500  | -0.74031400 | -0.14410800 |
| Zr | 1.96050600  | -0.71720800 | 2.56337700  |
| Zr | 2.64836600  | 1.95476500  | 1.08612700  |
| Zr | -0.15442500 | 1.43018200  | 2.39275800  |
| Zr | 2.31659700  | 1.44621100  | -1.95720500 |
| Zr | 0.06117500  | 2.79216800  | -0.41534200 |
| Zr | -0.61773700 | 0.69954900  | -2.56887900 |
| Zr | -2.50508500 | 0.78603200  | 0.13126300  |

|    |             |             |             |
|----|-------------|-------------|-------------|
| Zr | -1.17019300 | -1.96701900 | -1.05593100 |
| Zr | -0.96036400 | -1.47772100 | 2.01621100  |
| O  | 0.36159400  | -3.18883500 | -1.53098700 |
| O  | -2.33836200 | -1.33918700 | 0.58085800  |
| O  | -2.16354900 | -0.26704800 | -1.76895000 |
| O  | 1.26144800  | 0.17075900  | -3.34020800 |
| O  | 0.46032900  | 2.52324600  | -2.36461000 |
| O  | -1.37983400 | 2.34443500  | 0.97605300  |
| O  | 3.81441500  | 1.30448700  | -0.63353700 |
| O  | 0.06019800  | -0.25297800 | 3.46685700  |
| O  | 3.60761200  | 0.13715800  | 1.77014700  |
| O  | 0.87450000  | -2.53216500 | 2.30379300  |
| O  | 2.90534000  | -2.45472100 | -1.00121100 |
| O  | 1.04310600  | 3.02515600  | 1.48743600  |
| C  | -5.00039300 | 0.25785300  | -0.01539500 |
| C  | -4.67563300 | 0.87453700  | -1.20636600 |
| C  | -4.00596100 | 2.16061000  | -1.22544100 |
| C  | -4.05638900 | 2.87722800  | 0.02145500  |
| C  | -4.36914500 | 2.24311800  | 1.20574000  |
| C  | -4.67895900 | 0.84064700  | 1.26577000  |
| H  | -4.84618100 | 0.34310900  | -2.14328500 |
| H  | -3.91142500 | 2.69624400  | -2.17019200 |
| H  | -3.72145600 | 3.91625500  | 0.05302300  |
| H  | -4.26910500 | 2.79327100  | 2.14414000  |
| H  | -5.02499800 | 0.37624300  | 2.18713300  |
| Br | -5.80053800 | -1.45195400 | -0.04441400 |

Isomer II of PhBr@(ZrO)<sub>12</sub>

|    |             |             |             |
|----|-------------|-------------|-------------|
| Zr | 1.32858700  | -2.79973700 | -0.82859100 |
| Zr | 3.09781000  | -0.47940400 | -1.76008900 |
| Zr | 0.26170000  | -0.72639300 | -2.77116400 |
| Zr | 1.35522700  | 2.10901200  | -2.01196000 |
| Zr | -1.62313400 | 1.28515000  | -1.25750300 |
| Zr | 0.29842200  | 2.76862800  | 0.75597700  |
| Zr | -1.64172000 | -1.71626800 | -0.45665900 |
| Zr | -1.61520800 | 0.47572900  | 1.74645100  |
| Zr | 0.27093300  | -2.03685000 | 2.02159000  |
| Zr | 1.36587000  | 0.67916900  | 2.83134400  |
| Zr | 3.10299900  | -1.29817400 | 1.26389100  |
| Zr | 3.12075400  | 1.73073600  | 0.46417700  |
| O  | 3.36336200  | -2.18530000 | -0.52417400 |
| O  | 3.39226100  | 0.62216700  | 2.12266600  |
| O  | 1.88159800  | -1.41140900 | 3.03332800  |
| O  | -0.30805900 | -3.18928500 | 0.25626000  |

|    |              |             |             |
|----|--------------|-------------|-------------|
| O  | -1.75616400  | -1.53766500 | 1.64628800  |
| O  | -0.26505200  | 1.82423900  | 2.64743400  |
| O  | -1.76402500  | -0.62365200 | -2.15253100 |
| O  | 1.89896600   | 3.32740300  | -0.30780200 |
| O  | -0.29086000  | 1.38697700  | -2.89138400 |
| O  | 3.38092900   | 1.51066100  | -1.63036100 |
| O  | 1.85504400   | -1.93883600 | -2.74164200 |
| O  | -1.73631100  | 2.20554600  | 0.53800900  |
| C  | -8.25494800  | -1.22756800 | -0.01527200 |
| C  | -8.96502500  | -0.02571400 | -0.01473600 |
| C  | -8.28231500  | 1.19188100  | -0.00788800 |
| C  | -6.88313000  | 1.20904800  | -0.00130300 |
| C  | -6.19648900  | 0.00555400  | -0.00250100 |
| C  | -6.85584400  | -1.21246300 | -0.00902600 |
| H  | -8.79339200  | -2.18055300 | -0.02039200 |
| H  | -10.05799100 | -0.03804700 | -0.01952800 |
| H  | -8.84229700  | 2.13240000  | -0.00734500 |
| H  | -6.34433500  | 2.16483400  | 0.00509000  |
| H  | -6.29521900  | -2.15607900 | -0.00881400 |
| Br | -3.91838000  | 0.02406800  | 0.01394400  |

Isomer **III** of PhBr@(ZrO)<sub>12</sub>

|    |             |             |             |
|----|-------------|-------------|-------------|
| Zr | -1.76196200 | 2.23000900  | 1.73936000  |
| Zr | -1.51710400 | 2.60862300  | -1.27536100 |
| Zr | 1.02496100  | 2.32315200  | 0.43333600  |
| Zr | 0.90361900  | 0.86403000  | -2.33749600 |
| Zr | 2.05829800  | -0.62834200 | 0.15935500  |
| Zr | 0.22610500  | -2.19417700 | -1.70959400 |
| Zr | 0.47070900  | 0.21958400  | 2.70956700  |
| Zr | -0.02458000 | -2.54379300 | 1.27762500  |
| Zr | -2.44774600 | -0.80195100 | 2.29300700  |
| Zr | -2.63942900 | -2.21953700 | -0.42668800 |
| Zr | -3.66935500 | 0.62007400  | -0.16561900 |
| Zr | -2.04638200 | -0.18121000 | -2.63436300 |
| O  | -3.11966300 | 2.53650000  | 0.13231200  |
| O  | -3.70034800 | -0.86597200 | -1.72578800 |
| O  | -3.90705600 | -1.19052800 | 0.96470900  |
| O  | -1.50087100 | 0.86810400  | 3.20910400  |
| O  | -0.59503500 | -1.61112600 | 2.97265800  |
| O  | -0.98472100 | -3.37267500 | -0.44536300 |
| O  | 2.04123100  | 0.90084400  | 1.67101700  |
| O  | -0.08922200 | -0.81791700 | -3.16650100 |
| O  | 2.28808300  | 1.23623900  | -0.92278000 |
| O  | -0.98436400 | 1.64625600  | -2.95537900 |

|    |             |             |             |
|----|-------------|-------------|-------------|
| O  | -0.61335400 | 3.49692200  | 0.46427100  |
| O  | 1.61272100  | -2.58947200 | -0.12607600 |
| C  | 6.41843600  | 2.23776900  | -0.41425900 |
| C  | 7.71212000  | 2.09141000  | 0.08377000  |
| C  | 8.15108200  | 0.84409100  | 0.52594700  |
| C  | 7.30271500  | -0.26110500 | 0.47113400  |
| C  | 6.01747300  | -0.08570000 | -0.03382300 |
| C  | 5.55058700  | 1.14673700  | -0.48009700 |
| H  | 6.06866900  | 3.21373800  | -0.75952200 |
| H  | 8.38161500  | 2.95334500  | 0.12939800  |
| H  | 9.16302800  | 0.72318900  | 0.91964100  |
| H  | 7.63765700  | -1.24096400 | 0.81620500  |
| H  | 4.52778700  | 1.26451100  | -0.85422200 |
| Br | 4.87549000  | -1.61453900 | -0.12200500 |

(3) The optimized structures of the species involved in Suzuki-Miyaura cross-coupling mechanism catalyzed by Pd(PPh<sub>3</sub>)<sub>2</sub>

Pd(PPh<sub>3</sub>)<sub>2</sub>

|    |             |             |             |
|----|-------------|-------------|-------------|
| Pd | 0.00000600  | -0.00051300 | 0.00045000  |
| P  | 2.28649700  | -0.00012400 | 0.00014100  |
| P  | -2.28649300 | -0.00028100 | 0.00020300  |
| C  | 3.07722400  | -0.08470500 | 1.66036100  |
| C  | 2.46342700  | -0.89585600 | 2.62534800  |
| C  | 4.24256800  | 0.61315600  | 1.99941500  |
| C  | 3.01695000  | -1.02378100 | 3.89689200  |
| H  | 1.53515800  | -1.41697700 | 2.37067700  |
| C  | 4.78873700  | 0.49265800  | 3.27773900  |
| H  | 4.72415400  | 1.26089800  | 1.26260500  |
| C  | 4.18089900  | -0.32805600 | 4.22625300  |
| H  | 2.52968700  | -1.66090500 | 4.63925500  |
| H  | 5.69579000  | 1.04661600  | 3.53293100  |
| H  | 4.60991600  | -0.41969600 | 5.22731400  |
| C  | 3.07672700  | 1.48037600  | -0.75645600 |
| C  | 4.24020200  | 1.42529500  | -1.53315100 |
| C  | 2.46421900  | 2.72180000  | -0.53361000 |
| C  | 4.78582000  | 2.59291800  | -2.06788100 |
| H  | 4.72076300  | 0.46329000  | -1.72806300 |
| C  | 3.01726400  | 3.88723000  | -1.05843900 |
| H  | 1.53729300  | 2.76182500  | 0.04715700  |
| C  | 4.17936600  | 3.82481300  | -1.82846100 |
| H  | 5.69138900  | 2.53707000  | -2.67744200 |
| H  | 2.53102000  | 4.84877500  | -0.87554500 |
| H  | 4.60797200  | 4.73781400  | -2.24952900 |

|   |             |             |             |
|---|-------------|-------------|-------------|
| C | 3.07775100  | -1.39528000 | -0.90328200 |
| C | 4.24302700  | -2.03771200 | -0.46809200 |
| C | 2.46445400  | -1.82541900 | -2.08851400 |
| C | 4.78963100  | -3.08437600 | -1.21149200 |
| H | 4.72424800  | -1.72351300 | 0.46146600  |
| C | 3.01842400  | -2.86248100 | -2.83497500 |
| H | 1.53620200  | -1.34449200 | -2.41280000 |
| C | 4.18231000  | -3.49544000 | -2.39677200 |
| H | 5.69662000  | -3.58225100 | -0.85903400 |
| H | 2.53154000  | -3.18681800 | -3.75812300 |
| H | 4.61166300  | -4.31644900 | -2.97657900 |
| C | -3.07753100 | 1.39186900  | 0.90844900  |
| C | -2.46435600 | 1.81762800  | 2.09532000  |
| C | -4.24255700 | 2.03615000  | 0.47532000  |
| C | -3.01820300 | 2.85217400  | 2.84535600  |
| H | -1.53627400 | 1.33533300  | 2.41805400  |
| C | -4.78904400 | 3.08029500  | 1.22233700  |
| H | -4.72366700 | 1.72539800  | -0.45545500 |
| C | -4.18184600 | 3.48698200  | 2.40919000  |
| H | -2.53140000 | 3.17311500  | 3.76973300  |
| H | -5.69583700 | 3.57965500  | 0.87147900  |
| H | -4.61109800 | 4.30603400  | 2.99183100  |
| C | -3.07650900 | 0.09083500  | -1.66001700 |
| C | -4.24171600 | -0.60565200 | -2.00234200 |
| C | -2.46224200 | 0.90574000  | -2.62153900 |
| C | -4.78729800 | -0.48012000 | -3.28043600 |
| H | -4.72367100 | -1.25626200 | -1.26830600 |
| C | -3.01518200 | 1.03867500  | -3.89282100 |
| H | -1.53405900 | 1.42581000  | -2.36442400 |
| C | -4.17900700 | 0.34429200  | -4.22544200 |
| H | -5.69425000 | -1.03304500 | -3.53821000 |
| H | -2.52754600 | 1.67867800  | -4.63245700 |
| H | -4.60756200 | 0.43987400  | -5.22633200 |
| C | -3.07764300 | -1.48322300 | 0.75102500  |
| C | -4.24210500 | -1.43062500 | 1.52642200  |
| C | -2.46490500 | -2.72393500 | 0.52490500  |
| C | -4.78847200 | -2.59995800 | 2.05661700  |
| H | -4.72285800 | -0.46923600 | 1.72388100  |
| C | -3.01867400 | -3.89105100 | 1.04522300  |
| H | -1.53722400 | -2.76208500 | -0.05478300 |
| C | -4.18176300 | -3.83109500 | 1.81393900  |
| H | -5.69481600 | -2.54606200 | 2.66519900  |
| H | -2.53222300 | -4.85201300 | 0.85983300  |
| H | -4.61094800 | -4.74544800 | 2.23147100  |



**IS1**

|    |             |             |             |
|----|-------------|-------------|-------------|
| Pd | -0.01870700 | -0.79522900 | -0.11617800 |
| P  | 1.83701400  | 0.65515500  | -0.10723900 |
| P  | -2.16199200 | 0.16129000  | 0.03064900  |
| C  | 1.80186300  | 2.11806300  | -1.23136500 |
| C  | 0.56382100  | 2.70935100  | -1.51165700 |
| C  | 2.95905400  | 2.67799700  | -1.79246500 |
| C  | 0.48093100  | 3.83711100  | -2.32659300 |
| H  | -0.34321900 | 2.28141700  | -1.08044800 |
| C  | 2.87454900  | 3.80123900  | -2.61394700 |
| H  | 3.93469900  | 2.23008900  | -1.58960500 |
| C  | 1.63614300  | 4.38408200  | -2.88253600 |
| H  | -0.49527000 | 4.28404500  | -2.52999500 |
| H  | 3.78496800  | 4.22391600  | -3.04673400 |
| H  | 1.57248600  | 5.26381500  | -3.52803200 |
| C  | 3.44992200  | -0.10939800 | -0.55467500 |
| C  | 4.46670900  | -0.35333800 | 0.37549500  |
| C  | 3.62217300  | -0.55249800 | -1.87597000 |
| C  | 5.63216100  | -1.01822800 | -0.00841400 |
| H  | 4.35161700  | -0.02042600 | 1.40939100  |
| C  | 4.79314500  | -1.19940500 | -2.26058700 |
| H  | 2.82946400  | -0.38740600 | -2.61111500 |
| C  | 5.80198500  | -1.43892200 | -1.32587000 |
| H  | 6.41605500  | -1.20169700 | 0.73080900  |
| H  | 4.91550100  | -1.52739600 | -3.29612100 |
| H  | 6.71826200  | -1.95371000 | -1.62531900 |
| C  | 2.18922500  | 1.41716200  | 1.53535700  |
| C  | 2.65914500  | 2.72692900  | 1.69169800  |
| C  | 1.94468300  | 0.64270300  | 2.67905000  |
| C  | 2.88553200  | 3.24845500  | 2.96541500  |
| H  | 2.84279300  | 3.34968800  | 0.81337300  |
| C  | 2.18291800  | 1.16231700  | 3.95049900  |
| H  | 1.56060600  | -0.37597800 | 2.56646000  |
| C  | 2.65125900  | 2.46814900  | 4.09704700  |
| H  | 3.24852300  | 4.27396000  | 3.07227100  |
| H  | 1.99236600  | 0.54436100  | 4.83161200  |
| H  | 2.83031800  | 2.87896200  | 5.09397500  |
| C  | -3.03825900 | 0.23113000  | -1.58550500 |
| C  | -2.25433100 | 0.25403100  | -2.74688800 |
| C  | -4.43523500 | 0.26198500  | -1.70821100 |
| C  | -2.85274900 | 0.32912300  | -4.00426700 |
| H  | -1.16524300 | 0.19720800  | -2.65484800 |
| C  | -5.03150800 | 0.33043400  | -2.96598400 |

|    |             |             |             |
|----|-------------|-------------|-------------|
| H  | -5.06157600 | 0.22236000  | -0.81314500 |
| C  | -4.24147700 | 0.36831600  | -4.11567000 |
| H  | -2.22855400 | 0.34634600  | -4.90104300 |
| H  | -6.12117000 | 0.35259200  | -3.04894200 |
| H  | -4.71160800 | 0.42000700  | -5.10103400 |
| C  | -3.36648700 | -0.74090800 | 1.09646500  |
| C  | -3.73738900 | -0.28131500 | 2.36634600  |
| C  | -3.85473600 | -1.98461300 | 0.66418100  |
| C  | -4.57262900 | -1.04556000 | 3.18157100  |
| H  | -3.37650900 | 0.68576000  | 2.72355500  |
| C  | -4.69488400 | -2.74162000 | 1.47629300  |
| H  | -3.58785700 | -2.35752800 | -0.32802000 |
| C  | -5.05426300 | -2.27643300 | 2.74173000  |
| H  | -4.85186000 | -0.66881800 | 4.16886700  |
| H  | -5.07026500 | -3.70352300 | 1.11792800  |
| H  | -5.70991800 | -2.87231800 | 3.38124800  |
| C  | -2.30029200 | 1.88344100  | 0.67752700  |
| C  | -3.21854200 | 2.82802900  | 0.20185800  |
| C  | -1.41182600 | 2.25593000  | 1.69611300  |
| C  | -3.24897200 | 4.11444400  | 0.73992000  |
| H  | -3.90997000 | 2.56405000  | -0.60130200 |
| C  | -1.45385300 | 3.53681400  | 2.24367200  |
| H  | -0.66620500 | 1.53802600  | 2.04927300  |
| C  | -2.37184200 | 4.47037700  | 1.76385600  |
| H  | -3.96547300 | 4.84425800  | 0.35411900  |
| H  | -0.75128100 | 3.80733300  | 3.03568400  |
| H  | -2.39796500 | 5.47992300  | 2.18176100  |
| C  | -0.97057500 | -3.21961800 | -1.69336800 |
| C  | -0.57502800 | -2.93965300 | -0.35375600 |
| C  | 0.82437500  | -2.87879600 | -0.08030100 |
| C  | 1.77249100  | -3.16291200 | -1.09880600 |
| C  | 1.34137400  | -3.41051400 | -2.38438500 |
| C  | -0.03884800 | -3.43031900 | -2.68767600 |
| H  | -2.03722300 | -3.30013400 | -1.91998200 |
| H  | -1.28935800 | -3.08222300 | 0.46113700  |
| H  | 2.83430800  | -3.18134000 | -0.84860500 |
| H  | 2.07734200  | -3.60617400 | -3.16821100 |
| H  | -0.36926600 | -3.64994000 | -3.70570700 |
| Br | 1.40220800  | -3.12020100 | 1.73967400  |

## TS1

|    |             |             |             |
|----|-------------|-------------|-------------|
| Pd | 0.03248600  | -0.86547800 | 0.07255200  |
| P  | 1.82792100  | 0.66692400  | 0.04638600  |
| P  | -2.15659600 | 0.09577600  | -0.17760000 |

|   |             |             |             |
|---|-------------|-------------|-------------|
| C | 1.48809800  | 2.40529600  | -0.46881500 |
| C | 0.55266000  | 3.13257400  | 0.28426600  |
| C | 2.06374900  | 3.00828700  | -1.59375900 |
| C | 0.20788200  | 4.43168900  | -0.07622300 |
| H | 0.08373500  | 2.67486000  | 1.15982300  |
| C | 1.70818600  | 4.30865700  | -1.95845400 |
| H | 2.79751100  | 2.46227100  | -2.19091500 |
| C | 0.78181300  | 5.02365000  | -1.20279000 |
| H | -0.52289300 | 4.98006500  | 0.52323900  |
| H | 2.16755200  | 4.76559200  | -2.83894700 |
| H | 0.50569200  | 6.04122400  | -1.49015800 |
| C | 3.21039500  | 0.18910900  | -1.06697200 |
| C | 4.56178400  | 0.22354900  | -0.70588100 |
| C | 2.86127200  | -0.26736100 | -2.34636900 |
| C | 5.54429400  | -0.17558500 | -1.61258800 |
| H | 4.85328800  | 0.55681700  | 0.29247600  |
| C | 3.84392700  | -0.64927700 | -3.25555400 |
| H | 1.80483700  | -0.34195800 | -2.62179200 |
| C | 5.18953300  | -0.60547000 | -2.88989100 |
| H | 6.59591400  | -0.14904000 | -1.31557700 |
| H | 3.55523900  | -1.00222000 | -4.24855400 |
| H | 5.96147000  | -0.91647700 | -3.59837500 |
| C | 2.63082400  | 0.94654100  | 1.68195200  |
| C | 3.45451300  | 2.05424000  | 1.93194800  |
| C | 2.39552200  | 0.02873600  | 2.71290300  |
| C | 4.04609900  | 2.22595800  | 3.18164000  |
| H | 3.62581500  | 2.79360800  | 1.14505200  |
| C | 2.99142900  | 0.20103200  | 3.96262200  |
| H | 1.72348700  | -0.81736700 | 2.53796900  |
| C | 3.81895300  | 1.29716700  | 4.19816500  |
| H | 4.68461100  | 3.09400500  | 3.36473600  |
| H | 2.79780400  | -0.52329400 | 4.75772400  |
| H | 4.28141500  | 1.43509600  | 5.17886700  |
| C | -2.61865200 | 0.96141000  | -1.73283200 |
| C | -1.61438700 | 1.65878300  | -2.41727500 |
| C | -3.92070600 | 0.95899900  | -2.25201300 |
| C | -1.90894500 | 2.35399800  | -3.58858800 |
| H | -0.59480700 | 1.65706200  | -2.02383700 |
| C | -4.21032900 | 1.64656400  | -3.42991100 |
| H | -4.71246200 | 0.41147600  | -1.73465200 |
| C | -3.20672300 | 2.34715300  | -4.09863000 |
| H | -1.11532200 | 2.89819300  | -4.10632500 |
| H | -5.22844800 | 1.63404000  | -3.82741300 |
| H | -3.43644300 | 2.88481300  | -5.02210400 |

|    |             |             |             |
|----|-------------|-------------|-------------|
| C  | -3.52806500 | -1.11723400 | 0.01560600  |
| C  | -4.49719300 | -1.03366300 | 1.02088800  |
| C  | -3.56623100 | -2.20301800 | -0.87223700 |
| C  | -5.48485900 | -2.01406000 | 1.13291800  |
| H  | -4.48396900 | -0.19779800 | 1.72384600  |
| C  | -4.55940200 | -3.17153700 | -0.76806100 |
| H  | -2.80969600 | -2.28513800 | -1.65846800 |
| C  | -5.52128900 | -3.08171400 | 0.23983400  |
| H  | -6.23262800 | -1.93740500 | 1.92638000  |
| H  | -4.57749800 | -4.00799500 | -1.47115000 |
| H  | -6.29535100 | -3.84778700 | 0.32975600  |
| C  | -2.52726300 | 1.33553700  | 1.13048600  |
| C  | -3.27532600 | 2.49659300  | 0.90477500  |
| C  | -2.00402200 | 1.09849800  | 2.41047400  |
| C  | -3.49810800 | 3.40301900  | 1.94201600  |
| H  | -3.68030000 | 2.69947800  | -0.08945400 |
| C  | -2.23772700 | 1.99970500  | 3.44706100  |
| H  | -1.39788700 | 0.20391900  | 2.58576000  |
| C  | -2.98298100 | 3.15637400  | 3.21390300  |
| H  | -4.07991900 | 4.30882500  | 1.75263400  |
| H  | -1.82509700 | 1.80241100  | 4.43954000  |
| H  | -3.15825000 | 3.86845000  | 4.02429800  |
| C  | 1.29754300  | -3.81764000 | -2.15640000 |
| C  | 0.48617000  | -3.23091400 | -1.17810600 |
| C  | 1.07751100  | -2.69419200 | -0.02054000 |
| C  | 2.45524900  | -2.86767100 | 0.21002600  |
| C  | 3.23554200  | -3.47334800 | -0.76338400 |
| C  | 2.66743200  | -3.94363300 | -1.95567300 |
| H  | 0.83405100  | -4.21319300 | -3.06439700 |
| H  | -0.60023200 | -3.22556800 | -1.28896700 |
| H  | 2.90738600  | -2.50551300 | 1.13516800  |
| H  | 4.31122900  | -3.57163200 | -0.59530200 |
| H  | 3.29434700  | -4.42543500 | -2.70913300 |
| Br | -0.20135500 | -2.86039100 | 1.72531000  |

### FS1

|    |             |             |             |
|----|-------------|-------------|-------------|
| Pd | -0.00001400 | -0.12787000 | 0.00884600  |
| P  | 2.35776800  | -0.09899400 | -0.03763000 |
| P  | -2.35780600 | -0.09905800 | -0.03759000 |
| C  | 3.09261200  | -0.21149900 | 1.64160200  |
| C  | 2.43150700  | -0.98948000 | 2.60243300  |
| C  | 4.30071200  | 0.41390700  | 1.97896300  |
| C  | 2.97108300  | -1.13312900 | 3.87898600  |
| H  | 1.50190400  | -1.50036900 | 2.33288600  |

|   |             |             |             |
|---|-------------|-------------|-------------|
| C | 4.83284500  | 0.26971500  | 3.25968800  |
| H | 4.82966400  | 1.02057000  | 1.24075100  |
| C | 4.16881700  | -0.50162100 | 4.21212600  |
| H | 2.44834000  | -1.74468800 | 4.61845000  |
| H | 5.77390100  | 0.76470900  | 3.51223600  |
| H | 4.58682400  | -0.61157200 | 5.21601100  |
| C | 3.20862800  | 1.34300900  | -0.80011400 |
| C | 3.86451900  | 1.23222300  | -2.03267600 |
| C | 3.16825600  | 2.59352600  | -0.16508300 |
| C | 4.46817800  | 2.34657000  | -2.61580600 |
| H | 3.91288200  | 0.26824700  | -2.54285800 |
| C | 3.78155900  | 3.70013100  | -0.74488300 |
| H | 2.64725600  | 2.70950800  | 0.78739800  |
| C | 4.43144500  | 3.58156700  | -1.97342500 |
| H | 4.97585700  | 2.24160200  | -3.57784500 |
| H | 3.73848100  | 4.66535500  | -0.23488200 |
| H | 4.90793000  | 4.45294100  | -2.42963500 |
| C | 3.08378500  | -1.50934900 | -0.95784200 |
| C | 4.30063200  | -2.08720300 | -0.58218300 |
| C | 2.42333600  | -1.97999500 | -2.09898300 |
| C | 4.85231400  | -3.11664700 | -1.34372500 |
| H | 4.81860700  | -1.73914500 | 0.31445200  |
| C | 2.98303700  | -2.99915900 | -2.86516300 |
| H | 1.45562700  | -1.55464200 | -2.37544500 |
| C | 4.19782700  | -3.57067400 | -2.48740900 |
| H | 5.79918700  | -3.56801700 | -1.03737400 |
| H | 2.45810600  | -3.36107600 | -3.75241400 |
| H | 4.63090800  | -4.37921900 | -3.08163600 |
| C | -3.20830500 | 1.34329500  | -0.79980300 |
| C | -3.16853200 | 2.59345800  | -0.16405400 |
| C | -3.86307000 | 1.23316100  | -2.03301900 |
| C | -3.78132100 | 3.70037200  | -0.74381000 |
| H | -2.64837400 | 2.70893300  | 0.78894900  |
| C | -4.46622900 | 2.34781000  | -2.61608500 |
| H | -3.91096100 | 0.26945100  | -2.54375500 |
| C | -4.43009700 | 3.58246200  | -1.97299900 |
| H | -3.73871500 | 4.66532200  | -0.23324800 |
| H | -4.97304600 | 2.24335800  | -3.57863400 |
| H | -4.90618600 | 4.45407200  | -2.42916800 |
| C | -3.08405000 | -1.50903600 | -0.95819800 |
| C | -4.30132800 | -2.08636500 | -0.58314300 |
| C | -2.42329800 | -1.97988900 | -2.09908800 |
| C | -4.85314900 | -3.11547600 | -1.34503400 |
| H | -4.81953900 | -1.73817900 | 0.31330500  |

|    |             |             |             |
|----|-------------|-------------|-------------|
| C  | -2.98312600 | -2.99872200 | -2.86561300 |
| H  | -1.45524800 | -1.55497800 | -2.37503300 |
| C  | -4.19836100 | -3.56969500 | -2.48846800 |
| H  | -5.80037000 | -3.56643100 | -1.03914600 |
| H  | -2.45796700 | -3.36081200 | -3.75265900 |
| H  | -4.63155400 | -4.37797600 | -3.08297300 |
| C  | -3.09274400 | -0.21179300 | 1.64158100  |
| C  | -4.30126800 | 0.41294300  | 1.97870400  |
| C  | -2.43134800 | -0.98930300 | 2.60258900  |
| C  | -4.83352700 | 0.26855200  | 3.25935100  |
| H  | -4.83044400 | 1.01925600  | 1.24036000  |
| C  | -2.97103600 | -1.13313900 | 3.87907600  |
| H  | -1.50142400 | -1.49969800 | 2.33322700  |
| C  | -4.16919300 | -0.50230900 | 4.21196500  |
| H  | -5.77491400 | 0.76301700  | 3.51170200  |
| H  | -2.44805500 | -1.74432100 | 4.61868400  |
| H  | -4.58729800 | -0.61242400 | 5.21579100  |
| C  | -0.00011500 | 4.05373700  | -1.06309200 |
| C  | -0.00009000 | 4.69431600  | 0.17596200  |
| C  | -0.00005700 | 3.92701000  | 1.34126900  |
| C  | -0.00004400 | 2.53091200  | 1.26445900  |
| C  | -0.00006300 | 1.87580900  | 0.02237800  |
| C  | -0.00009900 | 2.65984900  | -1.13840400 |
| H  | -0.00014000 | 4.64391400  | -1.98375900 |
| H  | -0.00009600 | 5.78599300  | 0.23362500  |
| H  | -0.00002800 | 4.41537100  | 2.32029000  |
| H  | 0.00001800  | 1.94882900  | 2.19160200  |
| H  | -0.00010700 | 2.18254700  | -2.12228000 |
| Br | -0.00010500 | -2.64330700 | 0.33217800  |

## IM

|    |             |             |            |
|----|-------------|-------------|------------|
| Pd | 0.00300800  | 0.02229200  | 0.14246200 |
| P  | 2.32264600  | -0.17376000 | 0.03238900 |
| P  | -2.32654300 | -0.18290600 | 0.02919600 |
| C  | 3.02786500  | -0.59886000 | 1.66943500 |
| C  | 2.33999700  | -1.56257200 | 2.42415700 |
| C  | 4.19399100  | -0.01498800 | 2.17672600 |
| C  | 2.82831800  | -1.93442100 | 3.67428500 |
| H  | 1.42809700  | -2.00466200 | 1.99606700 |
| C  | 4.66943500  | -0.39036100 | 3.43381400 |
| H  | 4.73325700  | 0.73502800  | 1.59357900 |
| C  | 3.98912800  | -1.34876700 | 4.18267600 |
| H  | 2.29270600  | -2.68582800 | 4.26017300 |
| H  | 5.57879000  | 0.07073900  | 3.82746600 |

|   |             |             |             |
|---|-------------|-------------|-------------|
| H | 4.36423900  | -1.63979600 | 5.16731600  |
| C | 3.41040400  | 1.15302300  | -0.61628100 |
| C | 4.32960100  | 0.92186600  | -1.64806200 |
| C | 3.30994100  | 2.44162800  | -0.07043600 |
| C | 5.13560900  | 1.95746000  | -2.12022200 |
| H | 4.41983900  | -0.07311800 | -2.08852400 |
| C | 4.12273500  | 3.47016200  | -0.53999400 |
| H | 2.58313100  | 2.64851500  | 0.71765000  |
| C | 5.03608100  | 3.23214700  | -1.56678900 |
| H | 5.84695100  | 1.76215800  | -2.92658200 |
| H | 4.02837600  | 4.46834400  | -0.10599500 |
| H | 5.66765700  | 4.04281700  | -1.93887500 |
| C | 2.74352800  | -1.61624800 | -1.02208500 |
| C | 3.77770600  | -2.50166000 | -0.69857200 |
| C | 2.01471100  | -1.81719700 | -2.20215800 |
| C | 4.07807600  | -3.56928600 | -1.54419300 |
| H | 4.34613700  | -2.36053600 | 0.22392000  |
| C | 2.31863900  | -2.88282300 | -3.04651900 |
| H | 1.19357300  | -1.13862800 | -2.44987700 |
| C | 3.35126400  | -3.76137500 | -2.71820400 |
| H | 4.88385000  | -4.25842000 | -1.27943900 |
| H | 1.73825200  | -3.03306900 | -3.96005700 |
| H | 3.58522900  | -4.60208400 | -3.37603600 |
| C | -3.42950800 | 1.20723100  | -0.44150100 |
| C | -3.26302100 | 2.44939000  | 0.18705300  |
| C | -4.45136700 | 1.05598000  | -1.38845900 |
| C | -4.10538800 | 3.51450800  | -0.12292900 |
| H | -2.46113100 | 2.59148800  | 0.91391500  |
| C | -5.28864000 | 2.12663500  | -1.70004600 |
| H | -4.59702900 | 0.09540400  | -1.88714500 |
| C | -5.11822700 | 3.35720300  | -1.06838300 |
| H | -3.95729200 | 4.47734400  | 0.37172800  |
| H | -6.08017300 | 1.99460200  | -2.44200800 |
| H | -5.77350100 | 4.19621500  | -1.31596500 |
| C | -2.68337900 | -1.44206000 | -1.25592000 |
| C | -3.50366500 | -2.55008300 | -1.02882100 |
| C | -2.10654600 | -1.26500500 | -2.52105200 |
| C | -3.74164300 | -3.46851100 | -2.05237000 |
| H | -3.95384500 | -2.70195300 | -0.04529700 |
| C | -2.35295500 | -2.17709700 | -3.54331700 |
| H | -1.45998000 | -0.40122100 | -2.70284700 |
| C | -3.16972400 | -3.28471400 | -3.30925700 |
| H | -4.37970900 | -4.33512900 | -1.86208000 |
| H | -1.90214400 | -2.02564200 | -4.52746100 |

|   |             |             |             |
|---|-------------|-------------|-------------|
| H | -3.35829300 | -4.00570000 | -4.10862400 |
| C | -3.08421300 | -0.83754300 | 1.56613200  |
| C | -4.27950100 | -0.32611500 | 2.08651800  |
| C | -2.42234500 | -1.88145900 | 2.23314900  |
| C | -4.80967100 | -0.85201400 | 3.26472800  |
| H | -4.80001200 | 0.48630800  | 1.57482600  |
| C | -2.96594800 | -2.40277000 | 3.40528000  |
| H | -1.48923000 | -2.26814100 | 1.79932800  |
| C | -4.15538800 | -1.89013500 | 3.92507600  |
| H | -5.74139900 | -0.44551200 | 3.66616100  |
| H | -2.45031400 | -3.21726500 | 3.92077000  |
| H | -4.57331000 | -2.30039200 | 4.84815000  |
| C | 0.00854500  | 4.15710500  | -1.11825900 |
| C | 0.05593300  | 4.85613000  | 0.08755600  |
| C | 0.08789300  | 4.14131400  | 1.28591100  |
| C | 0.07155800  | 2.74387800  | 1.27181600  |
| C | 0.02106500  | 2.02045300  | 0.06536200  |
| C | -0.00783900 | 2.76034400  | -1.12630700 |
| H | -0.01621300 | 4.70412000  | -2.06534400 |
| H | 0.06812700  | 5.94924700  | 0.09403300  |
| H | 0.12658700  | 4.67423900  | 2.24089700  |
| H | 0.10057000  | 2.20720200  | 2.22619900  |
| H | -0.04380200 | 2.24201200  | -2.08948700 |
| O | -0.03421700 | -2.01986100 | 0.46361600  |
| H | 0.34750800  | -2.50761800 | -0.27374000 |

## IS2

|    |             |             |             |
|----|-------------|-------------|-------------|
| Pd | -0.10933200 | -0.05269900 | -0.04538500 |
| P  | 2.06440000  | 0.80359300  | 0.40224000  |
| P  | -2.50049700 | -0.19066200 | 0.09252000  |
| C  | 3.23903700  | 1.08125200  | -0.98232700 |
| C  | 4.41478400  | 0.32598800  | -1.08637300 |
| C  | 2.94355600  | 2.01936100  | -1.98503500 |
| C  | 5.27780300  | 0.50714400  | -2.16602300 |
| H  | 4.66254500  | -0.41273100 | -0.32249600 |
| C  | 3.81504300  | 2.20112800  | -3.05649400 |
| H  | 2.03282200  | 2.61847200  | -1.93298000 |
| C  | 4.98265000  | 1.44517800  | -3.15269700 |
| H  | 6.18856900  | -0.09302800 | -2.23079600 |
| H  | 3.56968800  | 2.93819100  | -3.82490300 |
| H  | 5.66165800  | 1.58734400  | -3.99719400 |
| C  | 3.07821000  | -0.07849400 | 1.65715600  |
| C  | 3.77606100  | 0.61989000  | 2.65351200  |
| C  | 3.20009300  | -1.47180200 | 1.58723400  |



|   |             |             |             |
|---|-------------|-------------|-------------|
| C | 4.57987400  | -0.06619700 | 3.56153800  |
| H | 3.69595100  | 1.70629000  | 2.72452000  |
| C | 4.01437700  | -2.15120400 | 2.49198500  |
| H | 2.65625900  | -2.03127300 | 0.82681000  |
| C | 4.70214500  | -1.45306300 | 3.48249200  |
| H | 5.11641900  | 0.49024700  | 4.33410200  |
| H | 4.10216400  | -3.23771500 | 2.41555000  |
| H | 5.33463800  | -1.98883100 | 4.19501300  |
| C | -0.27854400 | 1.42170100  | -1.37746700 |
| C | -0.51707700 | 2.77813300  | -1.13082500 |
| C | -0.08835100 | 1.02240600  | -2.71233000 |
| C | -0.57934000 | 3.70167500  | -2.17877500 |
| H | -0.64506000 | 3.13867300  | -0.10938200 |
| C | -0.15743800 | 1.94112300  | -3.76109100 |
| H | 0.13450100  | -0.02374400 | -2.94549900 |
| C | -0.40453400 | 3.28851400  | -3.49849700 |
| H | -0.76615500 | 4.75551500  | -1.95416800 |
| H | -0.00658800 | 1.59910200  | -4.78881200 |
| H | -0.45773200 | 4.01125300  | -4.31664900 |
| C | -3.48003600 | -1.00005000 | -1.22717400 |
| C | -3.03492400 | -0.93231900 | -2.55143400 |
| C | -4.69283900 | -1.64004400 | -0.94343300 |
| C | -3.79121100 | -1.49597700 | -3.57687000 |
| H | -2.09248600 | -0.43359300 | -2.77935300 |
| C | -5.44447600 | -2.20710600 | -1.97139300 |
| H | -5.05136000 | -1.70278800 | 0.08638300  |
| C | -4.99555300 | -2.13710000 | -3.28941700 |
| H | -3.43160500 | -1.43816200 | -4.60710000 |
| H | -6.38673500 | -2.70896100 | -1.73777900 |
| H | -5.58453400 | -2.58520800 | -4.09365200 |
| C | -3.05614100 | -1.04166400 | 1.63085100  |
| C | -3.66132800 | -0.37154600 | 2.70328800  |
| C | -2.83247800 | -2.42341800 | 1.72870500  |
| C | -4.01847600 | -1.07012400 | 3.85657600  |
| H | -3.87180100 | 0.69724900  | 2.64240900  |
| C | -3.18341100 | -3.11194900 | 2.88765100  |
| H | -2.37190500 | -2.95754300 | 0.89281400  |
| C | -3.77493000 | -2.43915800 | 3.95587600  |
| H | -4.49366300 | -0.53501200 | 4.68273100  |
| H | -2.97485200 | -4.18275100 | 2.94348000  |
| H | -4.04936200 | -2.98024300 | 4.86513500  |
| C | -3.28585400 | 1.46527300  | 0.23682400  |
| C | -4.36517200 | 1.86088800  | -0.56015400 |
| C | -2.77307400 | 2.37107500  | 1.17643400  |

|   |             |             |             |
|---|-------------|-------------|-------------|
| C | -4.92293300 | 3.13131600  | -0.41279500 |
| H | -4.77428000 | 1.17522900  | -1.30466700 |
| C | -3.34078900 | 3.63219100  | 1.33448600  |
| H | -1.91048300 | 2.08815800  | 1.78532800  |
| C | -4.41832300 | 4.01700900  | 0.53627200  |
| H | -5.76209800 | 3.42716300  | -1.04717000 |
| H | -2.92872100 | 4.32319200  | 2.07423600  |
| H | -4.85989800 | 5.01000900  | 0.65106900  |
| C | 2.38975400  | 4.77993300  | 1.55854100  |
| C | 2.59286100  | 3.58222000  | 0.87061500  |
| C | 1.85125500  | 2.44475300  | 1.20222800  |
| C | 0.91822900  | 2.52162800  | 2.24645600  |
| C | 0.72584800  | 3.71330400  | 2.93980100  |
| C | 1.45747900  | 4.84989100  | 2.59099500  |
| H | 2.97184100  | 5.66340200  | 1.28490000  |
| H | 3.33727400  | 3.53768100  | 0.07330000  |
| H | 0.34627200  | 1.63007300  | 2.52186200  |
| H | 0.00142100  | 3.75534400  | 3.75718300  |
| H | 1.30317100  | 5.78853800  | 3.12887400  |
| C | 2.25013000  | -4.62724800 | -0.30865600 |
| C | 3.44016100  | -4.89499200 | -0.98896400 |
| C | 3.87233200  | -4.03817500 | -2.00021400 |
| C | 3.09740100  | -2.92458500 | -2.32741200 |
| C | 1.91108900  | -2.67500000 | -1.63712900 |
| C | 1.45828900  | -3.50518100 | -0.59734600 |
| H | 1.92335300  | -5.33168800 | 0.46458900  |
| H | 4.02890600  | -5.78148600 | -0.73498800 |
| H | 4.80237400  | -4.24249300 | -2.53779700 |
| H | 3.41938400  | -2.24809000 | -3.12428400 |
| H | 1.31044300  | -1.80172800 | -1.91381100 |
| O | -1.02084200 | -2.86274200 | -0.73510200 |
| H | -1.17115500 | -3.60168800 | -1.33138500 |
| B | 0.05992900  | -3.18080500 | 0.19105900  |
| O | 0.22934900  | -1.88001000 | 1.02110700  |
| H | -0.33349400 | -2.00744300 | 1.79510300  |
| O | -0.35245200 | -4.22164300 | 1.10766400  |
| H | 0.39958400  | -4.56503100 | 1.59596000  |

## TS2

|    |             |             |             |
|----|-------------|-------------|-------------|
| Pd | 0.00737600  | 0.26995600  | -0.18994600 |
| P  | 2.36238800  | -0.12684500 | 0.08156000  |
| P  | -2.37554900 | -0.05748700 | 0.13847100  |
| C  | 2.85922600  | -0.70635400 | 1.75946700  |
| C  | 4.16473400  | -1.15854800 | 2.00632600  |

|   |             |             |             |
|---|-------------|-------------|-------------|
| C | 1.98337800  | -0.56366400 | 2.83649500  |
| C | 4.56045100  | -1.50229200 | 3.29564100  |
| H | 4.88423900  | -1.22666400 | 1.18681800  |
| C | 2.38231500  | -0.89521800 | 4.13169100  |
| H | 0.98073300  | -0.17883300 | 2.65062400  |
| C | 3.66853100  | -1.37524600 | 4.36203600  |
| H | 5.57806500  | -1.85964300 | 3.47166100  |
| H | 1.68155000  | -0.77740400 | 4.96192700  |
| H | 3.98344200  | -1.64015900 | 5.37444400  |
| C | 3.68959800  | 1.16300600  | -0.06768400 |
| C | 4.64833900  | 1.18486400  | -1.08541700 |
| C | 3.75718400  | 2.13227500  | 0.94406000  |
| C | 5.65019200  | 2.15787100  | -1.09249500 |
| H | 4.63064100  | 0.43374000  | -1.87628100 |
| C | 4.76196300  | 3.09357500  | 0.94090700  |
| H | 3.01522700  | 2.13588500  | 1.74651400  |
| C | 5.71268100  | 3.11194500  | -0.08076800 |
| H | 6.39214700  | 2.15821900  | -1.89497800 |
| H | 4.79876600  | 3.83784900  | 1.74011100  |
| H | 6.50204900  | 3.86772800  | -0.08460500 |
| C | -0.01985300 | -1.76564400 | 0.00928100  |
| C | -0.01043300 | -2.44516700 | -1.22062300 |
| C | -0.06720300 | -2.53846300 | 1.17461400  |
| C | -0.03786300 | -3.83601600 | -1.28511300 |
| H | 0.01927700  | -1.87151000 | -2.15108100 |
| C | -0.08894100 | -3.93721100 | 1.11604800  |
| H | -0.09569700 | -2.06728500 | 2.15778300  |
| C | -0.07219600 | -4.59170400 | -0.11187400 |
| H | -0.03094500 | -4.33154100 | -2.25951400 |
| H | -0.12161700 | -4.51268600 | 2.04581700  |
| H | -0.09014800 | -5.68384100 | -0.15731500 |
| C | -2.72181000 | -0.43935700 | 1.90912100  |
| C | -1.78924600 | -0.03378000 | 2.86747400  |
| C | -3.94922600 | -0.96155000 | 2.34362000  |
| C | -2.04979700 | -0.18146300 | 4.23029400  |
| H | -0.86086000 | 0.43068800  | 2.52378400  |
| C | -4.20537400 | -1.12441100 | 3.70260700  |
| H | -4.71979300 | -1.22663200 | 1.61608500  |
| C | -3.25412900 | -0.74109400 | 4.64967100  |
| H | -1.31066200 | 0.14909100  | 4.96449900  |
| H | -5.16245500 | -1.54116500 | 4.02612500  |
| H | -3.46164900 | -0.86427600 | 5.71555600  |
| C | -3.74666500 | 1.19012900  | -0.06569500 |
| C | -4.59771700 | 1.22086300  | -1.17702100 |

|   |             |             |             |
|---|-------------|-------------|-------------|
| C | -3.95934100 | 2.12655000  | 0.95770800  |
| C | -5.61720000 | 2.16791100  | -1.26871500 |
| H | -4.47839400 | 0.49374000  | -1.97974300 |
| C | -4.97378600 | 3.07670800  | 0.86225500  |
| H | -3.33330400 | 2.11249000  | 1.85271300  |
| C | -5.80645800 | 3.10403500  | -0.25442800 |
| H | -6.27150100 | 2.16708300  | -2.14416400 |
| H | -5.11514100 | 3.79595500  | 1.67275100  |
| H | -6.60465100 | 3.84642900  | -0.33016200 |
| C | -2.98094800 | -1.50200000 | -0.83130300 |
| C | -3.32060700 | -2.72354700 | -0.23798800 |
| C | -3.00228200 | -1.40098700 | -2.23215900 |
| C | -3.71831400 | -3.80450000 | -1.02330600 |
| H | -3.24605300 | -2.85451800 | 0.84183500  |
| C | -3.41198900 | -2.48193200 | -3.00978700 |
| H | -2.66734400 | -0.47324300 | -2.70419100 |
| C | -3.77893700 | -3.68516600 | -2.40940900 |
| H | -3.97180800 | -4.75186800 | -0.54127000 |
| H | -3.43047800 | -2.38365600 | -4.09835800 |
| H | -4.09464200 | -4.53369400 | -3.02168100 |
| C | 3.71572400  | -3.64801400 | -1.63474100 |
| C | 3.34881400  | -2.69556300 | -0.68507000 |
| C | 2.92584900  | -1.42459400 | -1.08770300 |
| C | 2.83942300  | -1.13501100 | -2.45862200 |
| C | 3.21854800  | -2.08752600 | -3.40199700 |
| C | 3.66347800  | -3.34463700 | -2.99326500 |
| H | 4.03566100  | -4.63952800 | -1.30520200 |
| H | 3.36601700  | -2.96210800 | 0.37273600  |
| H | 2.43071900  | -0.17424900 | -2.78478500 |
| H | 3.15210600  | -1.84860500 | -4.46658800 |
| H | 3.95465700  | -4.09270100 | -3.73497000 |
| C | 1.34878800  | 3.10496300  | -0.86842000 |
| C | 1.65138900  | 4.38391200  | -0.40649500 |
| C | 0.71493800  | 5.08840800  | 0.35168700  |
| C | -0.52587900 | 4.50955100  | 0.61233200  |
| C | -0.81886300 | 3.24335500  | 0.10641600  |
| C | 0.10043600  | 2.48045700  | -0.64529900 |
| H | 2.09502900  | 2.58807500  | -1.47814400 |
| H | 2.62419800  | 4.83042500  | -0.63061000 |
| H | 0.94743100  | 6.09006800  | 0.72456100  |
| H | -1.27728200 | 5.05666100  | 1.18934000  |
| H | -1.82497100 | 2.85456400  | 0.26153600  |
| O | -1.87143300 | 1.48581600  | -2.42187400 |
| H | -2.46075900 | 2.23994500  | -2.52724600 |

|   |             |            |             |
|---|-------------|------------|-------------|
| B | -0.53514500 | 1.95542600 | -2.48720200 |
| O | 0.42397200  | 0.94757300 | -2.84969300 |
| H | 0.10825100  | 0.54308900 | -3.66630400 |
| O | -0.48624800 | 3.19547600 | -3.15567000 |
| H | 0.40794900  | 3.54473300 | -3.17521000 |

## FS2

|    |             |             |             |
|----|-------------|-------------|-------------|
| Pd | -0.03031600 | 0.00308600  | 0.20333600  |
| P  | -2.37787100 | -0.01488800 | 0.28851500  |
| P  | 2.31414400  | -0.10780000 | 0.29520700  |
| C  | -3.07847100 | 0.28556200  | 1.96299100  |
| C  | -4.33730900 | -0.21204600 | 2.33062700  |
| C  | -2.36032300 | 1.06230700  | 2.87954000  |
| C  | -4.86032700 | 0.05907000  | 3.59338200  |
| H  | -4.91179800 | -0.81886100 | 1.62733800  |
| C  | -2.88850800 | 1.33416600  | 4.14108900  |
| H  | -1.39146400 | 1.47252100  | 2.59043300  |
| C  | -4.13663400 | 0.83077400  | 4.50237400  |
| H  | -5.84124600 | -0.33698900 | 3.86787700  |
| H  | -2.31709200 | 1.94577200  | 4.84365600  |
| H  | -4.54816300 | 1.04029300  | 5.49302000  |
| C  | -3.26033600 | -1.55421700 | -0.21302600 |
| C  | -4.07822800 | -1.62883000 | -1.34528800 |
| C  | -3.08785900 | -2.70338900 | 0.57264800  |
| C  | -4.69836800 | -2.83047300 | -1.69252800 |
| H  | -4.24568000 | -0.74436700 | -1.96216300 |
| C  | -3.70995600 | -3.89806400 | 0.22711700  |
| H  | -2.45443500 | -2.66733400 | 1.46042700  |
| C  | -4.51392600 | -3.96744200 | -0.91135200 |
| H  | -5.33414200 | -2.87073000 | -2.58064000 |
| H  | -3.55506600 | -4.78399100 | 0.84722300  |
| H  | -4.99735000 | -4.90823900 | -1.18631800 |
| C  | 0.02215600  | 2.08536700  | 0.42237500  |
| C  | -0.29770200 | 2.94760700  | -0.64116000 |
| C  | 0.46210000  | 2.71253000  | 1.60374700  |
| C  | -0.20348500 | 4.33753100  | -0.53396400 |
| H  | -0.62585600 | 2.53179400  | -1.59749700 |
| C  | 0.55936500  | 4.10041200  | 1.72816800  |
| H  | 0.76717500  | 2.10706000  | 2.46569600  |
| C  | 0.22234700  | 4.92488700  | 0.65617200  |
| H  | -0.47070700 | 4.96732100  | -1.38863700 |
| H  | 0.91033800  | 4.53868500  | 2.66739300  |
| H  | 0.29523700  | 6.01203400  | 0.74624800  |
| C  | 2.82868300  | -0.89414400 | 1.87271900  |

|   |             |             |             |
|---|-------------|-------------|-------------|
| C | 2.00499300  | -0.73620500 | 2.99455500  |
| C | 4.03647700  | -1.58982600 | 2.00746500  |
| C | 2.38364400  | -1.25806600 | 4.23002300  |
| H | 1.05023100  | -0.21205800 | 2.88894500  |
| C | 4.41010700  | -2.11798400 | 3.24241600  |
| H | 4.68965500  | -1.72199800 | 1.14174400  |
| C | 3.58661300  | -1.95186200 | 4.35536400  |
| H | 1.72980200  | -1.12955100 | 5.09601500  |
| H | 5.35277400  | -2.66317500 | 3.33433200  |
| H | 3.88130900  | -2.36819800 | 5.32190100  |
| C | 3.20706500  | -1.09300100 | -0.98773600 |
| C | 4.03736700  | -0.48508500 | -1.94092000 |
| C | 3.03888200  | -2.48676500 | -1.03165500 |
| C | 4.66651000  | -1.24859700 | -2.92562600 |
| H | 4.20480500  | 0.59278700  | -1.91672000 |
| C | 3.68134000  | -3.24445100 | -2.00790500 |
| H | 2.40498400  | -2.98814000 | -0.29841200 |
| C | 4.49047500  | -2.62988700 | -2.96272100 |
| H | 5.30624000  | -0.75398500 | -3.66069000 |
| H | 3.53448500  | -4.32693500 | -2.02252000 |
| H | 4.98605400  | -3.22738400 | -3.73197100 |
| C | 3.24482900  | 1.47836000  | 0.30830700  |
| C | 4.16029700  | 1.80394800  | 1.31489000  |
| C | 3.00186800  | 2.40244400  | -0.71856100 |
| C | 4.82480200  | 3.03039200  | 1.29306300  |
| H | 4.35508900  | 1.10311900  | 2.12873800  |
| C | 3.67340200  | 3.62140600  | -0.74021100 |
| H | 2.27953700  | 2.16912100  | -1.50392700 |
| C | 4.58401300  | 3.94051100  | 0.26712400  |
| H | 5.53324100  | 3.27378900  | 2.08888300  |
| H | 3.46958300  | 4.33402200  | -1.54278700 |
| H | 5.10109500  | 4.90328700  | 0.25469000  |
| C | -4.70051800 | 3.11176600  | -1.11358100 |
| C | -4.12985900 | 2.16084900  | -0.26747500 |
| C | -3.18048200 | 1.26014100  | -0.75945300 |
| C | -2.80447600 | 1.33632700  | -2.10740100 |
| C | -3.37958800 | 2.28162800  | -2.95286100 |
| C | -4.33133300 | 3.17215500  | -2.45570900 |
| H | -5.43727300 | 3.81379400  | -0.71534800 |
| H | -4.42330700 | 2.12706300  | 0.78364600  |
| H | -2.04113600 | 0.65807300  | -2.49833900 |
| H | -3.05392000 | 2.33522400  | -3.99411200 |
| H | -4.77784100 | 3.92159700  | -3.11407300 |
| C | -0.22277200 | -2.60224100 | -1.34076600 |

|   |             |             |             |
|---|-------------|-------------|-------------|
| C | -0.21454100 | -3.98048800 | -1.56523800 |
| C | -0.00293500 | -4.86682700 | -0.50839200 |
| C | 0.19340400  | -4.35485300 | 0.77394100  |
| C | 0.17960300  | -2.97261000 | 0.98877100  |
| C | -0.02426500 | -2.05730100 | -0.05882300 |
| H | -0.38312600 | -1.94325100 | -2.20026400 |
| H | -0.37234600 | -4.36475200 | -2.57751400 |
| H | 0.00633000  | -5.94639400 | -0.68217300 |
| H | 0.36212100  | -5.03412200 | 1.61543400  |
| H | 0.34456000  | -2.60949900 | 2.00795400  |
| O | 1.51147500  | 0.81213900  | -3.51542100 |
| H | 1.88121100  | -0.03701800 | -3.24256200 |
| B | 0.28655300  | 0.70876300  | -4.09923900 |
| O | -0.37519200 | 1.83501900  | -4.50362800 |
| H | 0.11486600  | 2.63338000  | -4.28160900 |
| O | -0.29812500 | -0.51227200 | -4.28019600 |
| H | -1.15521700 | -0.44120300 | -4.71155100 |

### IS3

|    |             |             |             |
|----|-------------|-------------|-------------|
| Pd | 0.02104200  | -0.92796400 | -0.00268600 |
| P  | 1.94749900  | 0.52454200  | 0.07247800  |
| P  | -1.90385100 | 0.57231800  | -0.06862500 |
| C  | 2.26501000  | 1.82207600  | -1.19484300 |
| C  | 3.54504900  | 2.35775400  | -1.40585500 |
| C  | 1.20289600  | 2.28274400  | -1.98009200 |
| C  | 3.74679800  | 3.34552200  | -2.36737100 |
| H  | 4.39230700  | 1.98903000  | -0.82230000 |
| C  | 1.40513400  | 3.27242200  | -2.94108800 |
| H  | 0.20582300  | 1.86418200  | -1.83752700 |
| C  | 2.67694600  | 3.80689300  | -3.13510100 |
| H  | 4.74900900  | 3.75307800  | -2.52217800 |
| H  | 0.56161700  | 3.62115400  | -3.54153400 |
| H  | 2.83859300  | 4.57908400  | -3.89148900 |
| C  | 3.57920600  | -0.32426300 | 0.11394400  |
| C  | 4.38809400  | -0.36180300 | 1.25372500  |
| C  | 4.00321100  | -0.98986400 | -1.04487400 |
| C  | 5.60108300  | -1.05236700 | 1.23455400  |
| H  | 4.07515000  | 0.14835800  | 2.16694000  |
| C  | 5.21243900  | -1.67608900 | -1.06114500 |
| H  | 3.37627100  | -0.98244800 | -1.93935800 |
| C  | 6.01504300  | -1.71067500 | 0.08012400  |
| H  | 6.22322700  | -1.07421200 | 2.13286400  |
| H  | 5.52364400  | -2.19922100 | -1.96822600 |
| H  | 6.96207800  | -2.25588500 | 0.06821800  |

|   |             |             |             |
|---|-------------|-------------|-------------|
| C | -1.29846900 | -2.46346300 | 0.24501200  |
| C | -1.98882100 | -3.08286000 | -0.80697300 |
| C | -1.54715800 | -2.93390000 | 1.54414000  |
| C | -2.91352300 | -4.10353000 | -0.57039600 |
| H | -1.81226200 | -2.76969700 | -1.83961400 |
| C | -2.46392600 | -3.95821000 | 1.78699700  |
| H | -1.01648300 | -2.49626800 | 2.39545800  |
| C | -3.15970100 | -4.54437000 | 0.72991000  |
| H | -3.44031000 | -4.56169200 | -1.41275300 |
| H | -2.63515900 | -4.29996000 | 2.81202100  |
| H | -3.87757700 | -5.34762200 | 0.91600800  |
| C | -1.73251400 | 2.41311600  | -0.09418100 |
| C | -0.96257900 | 3.02488600  | 0.90519800  |
| C | -2.31867500 | 3.22014900  | -1.07838500 |
| C | -0.79318800 | 4.40799500  | 0.92799600  |
| H | -0.48368500 | 2.41615100  | 1.67502000  |
| C | -2.13779300 | 4.60284200  | -1.06085300 |
| H | -2.91829100 | 2.76846500  | -1.87100800 |
| C | -1.37737800 | 5.20138600  | -0.05794100 |
| H | -0.18909900 | 4.86177900  | 1.71724000  |
| H | -2.59956800 | 5.21618300  | -1.83887000 |
| H | -1.23696200 | 6.28508000  | -0.04697000 |
| C | -2.73234600 | 0.25049900  | -1.67857600 |
| C | -4.10901400 | 0.41834800  | -1.87492200 |
| C | -1.93341900 | -0.13261200 | -2.76388500 |
| C | -4.67177300 | 0.20839200  | -3.13304900 |
| H | -4.74719800 | 0.71115300  | -1.03782900 |
| C | -2.49580000 | -0.33280400 | -4.02344900 |
| H | -0.86136900 | -0.29272700 | -2.60893700 |
| C | -3.86721600 | -0.16451000 | -4.20943800 |
| H | -5.74817700 | 0.33660900  | -3.27204600 |
| H | -1.86006400 | -0.63374200 | -4.85970200 |
| H | -4.31164000 | -0.33064800 | -5.19395500 |
| C | -3.25461100 | 0.33893900  | 1.16725800  |
| C | -3.52676700 | 1.29557500  | 2.15449900  |
| C | -4.00536900 | -0.84715400 | 1.15268000  |
| C | -4.52122900 | 1.07194200  | 3.10593500  |
| H | -2.97074700 | 2.23409500  | 2.18096400  |
| C | -5.00418500 | -1.06088000 | 2.10002100  |
| H | -3.81678300 | -1.61141600 | 0.39627200  |
| C | -5.26372600 | -0.10651800 | 3.08209200  |
| H | -4.71901000 | 1.83234200  | 3.86564500  |
| H | -5.57545800 | -1.99165800 | 2.06861200  |
| H | -6.04541600 | -0.27994700 | 3.82599700  |



|   |            |             |             |
|---|------------|-------------|-------------|
| C | 2.46606200 | 3.31947300  | 3.10237400  |
| C | 2.49585300 | 2.70521600  | 1.85028800  |
| C | 1.95294600 | 1.42711500  | 1.67760600  |
| C | 1.37976800 | 0.77621800  | 2.78007300  |
| C | 1.35731300 | 1.38851400  | 4.03204900  |
| C | 1.89905000 | 2.66368300  | 4.19489600  |
| H | 2.88955400 | 4.31984500  | 3.22367900  |
| H | 2.93343200 | 3.23257000  | 0.99979300  |
| H | 0.93251000 | -0.21392300 | 2.64507300  |
| H | 0.90635300 | 0.86949400  | 4.88128600  |
| H | 1.87624200 | 3.14823000  | 5.17421200  |
| C | 1.95291400 | -3.12071200 | 0.82024700  |
| C | 2.81980500 | -4.19415100 | 0.60735600  |
| C | 2.98704500 | -4.72255200 | -0.67214000 |
| C | 2.27070600 | -4.16964500 | -1.73257900 |
| C | 1.40404000 | -3.09656700 | -1.51304400 |
| C | 1.23733300 | -2.54075700 | -0.23598100 |
| H | 1.84043900 | -2.73431300 | 1.83811600  |
| H | 3.36771100 | -4.62233400 | 1.45182900  |
| H | 3.66292600 | -5.56532400 | -0.83925000 |
| H | 2.37835300 | -4.58191800 | -2.74052300 |
| H | 0.83998700 | -2.69711700 | -2.36228100 |

### TS3

|    |             |             |             |
|----|-------------|-------------|-------------|
| Pd | -0.01482100 | -0.86123100 | -0.01375200 |
| P  | -1.95903200 | 0.54899000  | -0.12335700 |
| P  | 1.92417600  | 0.60086100  | 0.10352400  |
| C  | -2.37287900 | 1.78085900  | 1.18278000  |
| C  | -3.68220000 | 2.23522100  | 1.40264500  |
| C  | -1.34199200 | 2.27805300  | 1.98838800  |
| C  | -3.94561200 | 3.17666700  | 2.39558800  |
| H  | -4.50357300 | 1.84043800  | 0.79945300  |
| C  | -1.60575200 | 3.22281800  | 2.97930900  |
| H  | -0.32099700 | 1.92442400  | 1.83455900  |
| C  | -2.90784600 | 3.67441800  | 3.18430100  |
| H  | -4.97048200 | 3.52056000  | 2.55700600  |
| H  | -0.78621900 | 3.60221300  | 3.59435500  |
| H  | -3.11751900 | 4.41067000  | 3.96442700  |
| C  | -3.54841400 | -0.36676700 | -0.25347900 |
| C  | -4.31181000 | -0.41772700 | -1.42472300 |
| C  | -3.98241500 | -1.08039200 | 0.87268500  |
| C  | -5.49319900 | -1.15995400 | -1.46475300 |
| H  | -3.98917700 | 0.12904800  | -2.31347200 |
| C  | -5.16501800 | -1.81146100 | 0.83252400  |

|   |             |             |             |
|---|-------------|-------------|-------------|
| H | -3.38546100 | -1.07125900 | 1.78816100  |
| C | -5.92468700 | -1.85410900 | -0.33709900 |
| H | -6.08086400 | -1.18912800 | -2.38593500 |
| H | -5.48699700 | -2.36490700 | 1.71763900  |
| H | -6.85092700 | -2.43330500 | -0.36959600 |
| C | 0.96793200  | -2.67016200 | -0.29807400 |
| C | 1.85422100  | -3.22134700 | 0.64867600  |
| C | 1.16487600  | -3.03877500 | -1.64511300 |
| C | 2.88055400  | -4.08329600 | 0.27038300  |
| H | 1.73680200  | -2.97902200 | 1.70782500  |
| C | 2.18876700  | -3.90407900 | -2.02514900 |
| H | 0.49261000  | -2.65233000 | -2.41652700 |
| C | 3.05620600  | -4.43563600 | -1.07028100 |
| H | 3.55034900  | -4.48759400 | 1.03462000  |
| H | 2.30779600  | -4.16564700 | -3.08043100 |
| H | 3.85280900  | -5.12367800 | -1.36375300 |
| C | 1.76173400  | 2.43018000  | 0.27651500  |
| C | 0.99686900  | 3.11759700  | -0.67751500 |
| C | 2.33552800  | 3.15477300  | 1.32915100  |
| C | 0.81985800  | 4.49634000  | -0.58751900 |
| H | 0.52970300  | 2.56927000  | -1.49906500 |
| C | 2.14521700  | 4.53366100  | 1.42497600  |
| H | 2.93430900  | 2.64013700  | 2.08366400  |
| C | 1.38962000  | 5.20829000  | 0.46782400  |
| H | 0.22060400  | 5.01175900  | -1.34195000 |
| H | 2.59682200  | 5.08379100  | 2.25460300  |
| H | 1.24180900  | 6.28829700  | 0.54556900  |
| C | 2.81245700  | 0.15051900  | 1.65169000  |
| C | 4.20645400  | 0.18606600  | 1.77576700  |
| C | 2.04151600  | -0.22441700 | 2.76080000  |
| C | 4.81485700  | -0.14491100 | 2.98636500  |
| H | 4.82176000  | 0.46939700  | 0.91846600  |
| C | 2.64980200  | -0.54384800 | 3.97318300  |
| H | 0.95195400  | -0.27594400 | 2.66215300  |
| C | 4.03947700  | -0.50734900 | 4.08704700  |
| H | 5.90441700  | -0.11919500 | 3.06857800  |
| H | 2.03552900  | -0.83331000 | 4.82946000  |
| H | 4.51925000  | -0.76759400 | 5.03390100  |
| C | 3.23399100  | 0.45487800  | -1.18345600 |
| C | 3.69173500  | 1.54378300  | -1.93697200 |
| C | 3.76787300  | -0.81751000 | -1.43885200 |
| C | 4.65854400  | 1.36326100  | -2.92612800 |
| H | 3.29932200  | 2.54504900  | -1.74981800 |
| C | 4.73914200  | -0.99068700 | -2.42177400 |

|   |             |             |             |
|---|-------------|-------------|-------------|
| H | 3.43213200  | -1.68047600 | -0.86087200 |
| C | 5.18510800  | 0.09693800  | -3.17216700 |
| H | 5.00497000  | 2.22440100  | -3.50333100 |
| H | 5.14182300  | -1.99045800 | -2.60177300 |
| H | 5.94385900  | -0.04220100 | -3.94646600 |
| C | -2.46892500 | 3.48555700  | -3.02091500 |
| C | -2.52623200 | 2.80240100  | -1.80597100 |
| C | -1.95143300 | 1.53228700  | -1.68093700 |
| C | -1.31629100 | 0.96222100  | -2.79414800 |
| C | -1.26832200 | 1.64146700  | -4.01029700 |
| C | -1.84313500 | 2.90733500  | -4.12508700 |
| H | -2.91790600 | 4.47872900  | -3.10410000 |
| H | -3.01244400 | 3.26857800  | -0.94603800 |
| H | -0.84021900 | -0.01872800 | -2.69302600 |
| H | -0.76917000 | 1.18396200  | -4.86796300 |
| H | -1.79891000 | 3.44580400  | -5.07509500 |
| C | -1.78290100 | -3.29355900 | -0.67845500 |
| C | -2.75701300 | -4.21507600 | -0.30626600 |
| C | -2.91786100 | -4.57756400 | 1.03211600  |
| C | -2.09360700 | -3.99147500 | 1.99239400  |
| C | -1.11350200 | -3.07379100 | 1.61741700  |
| C | -0.92691200 | -2.70205300 | 0.27045400  |
| H | -1.67246200 | -3.04591600 | -1.73753200 |
| H | -3.39917200 | -4.65616700 | -1.07355500 |
| H | -3.67496800 | -5.31034400 | 1.32177800  |
| H | -2.20312400 | -4.26027900 | 3.04720500  |
| H | -0.45970200 | -2.65805000 | 2.38988200  |

### FS3

|    |             |             |             |
|----|-------------|-------------|-------------|
| Pd | 0.88518400  | 0.86399600  | 0.01204900  |
| P  | 2.72747400  | -0.48238200 | 0.22384200  |
| P  | -0.96374900 | 2.18752000  | -0.17751500 |
| C  | 3.82137400  | -0.56806100 | -1.25435700 |
| C  | 4.44761600  | -1.74333600 | -1.68590700 |
| C  | 4.02300100  | 0.61634600  | -1.97726700 |
| C  | 5.26931200  | -1.73021100 | -2.81366300 |
| H  | 4.28743100  | -2.67738600 | -1.14162900 |
| C  | 4.85292200  | 0.62963500  | -3.09554700 |
| H  | 3.50845700  | 1.52864400  | -1.65939800 |
| C  | 5.47730100  | -0.54509500 | -3.51709100 |
| H  | 5.74885400  | -2.65516100 | -3.14424500 |
| H  | 5.00349900  | 1.56014500  | -3.64870700 |
| H  | 6.12055800  | -0.53766100 | -4.40070700 |
| C  | 2.36620700  | -2.25064100 | 0.57786600  |

|   |             |             |             |
|---|-------------|-------------|-------------|
| C | 3.15117400  | -3.05035100 | 1.41757700  |
| C | 1.23728400  | -2.80947900 | -0.03651000 |
| C | 2.81557900  | -4.38820500 | 1.62745900  |
| H | 4.02544700  | -2.62500600 | 1.91685100  |
| C | 0.90889700  | -4.14803400 | 0.16527500  |
| H | 0.60278200  | -2.18002800 | -0.66740100 |
| C | 1.69906600  | -4.93942100 | 0.99977700  |
| H | 3.43154400  | -5.00271400 | 2.28918400  |
| H | 0.02427400  | -4.56422800 | -0.32374300 |
| H | 1.43857000  | -5.98751100 | 1.16850900  |
| C | -3.79746800 | -3.10606600 | 0.50123100  |
| C | -4.51640400 | -1.90060700 | 0.51146000  |
| C | -3.80652700 | -3.89181500 | 1.66429100  |
| C | -5.22338400 | -1.49911900 | 1.64219600  |
| H | -4.53528400 | -1.27701400 | -0.38561700 |
| C | -4.51387800 | -3.49117100 | 2.79491000  |
| H | -3.22868300 | -4.81880200 | 1.69111600  |
| C | -5.22776100 | -2.29330300 | 2.78849800  |
| H | -5.77826900 | -0.55782300 | 1.62597800  |
| H | -4.49986400 | -4.11629700 | 3.69135800  |
| H | -5.78485300 | -1.97895000 | 3.67462300  |
| C | -0.64986500 | 3.94507300  | -0.62424400 |
| C | 0.51055900  | 4.54311000  | -0.11346300 |
| C | -1.50490100 | 4.70101800  | -1.43551900 |
| C | 0.79917900  | 5.87720700  | -0.39156400 |
| H | 1.19360600  | 3.94306800  | 0.49610000  |
| C | -1.20787900 | 6.03353700  | -1.72225700 |
| H | -2.40644800 | 4.24472400  | -1.85209200 |
| C | -0.05922500 | 6.62480700  | -1.19831200 |
| H | 1.70616500  | 6.33222400  | 0.01433900  |
| H | -1.87952300 | 6.61248800  | -2.36134000 |
| H | 0.17208400  | 7.66856500  | -1.42558400 |
| C | -2.18560700 | 1.65854600  | -1.45123000 |
| C | -3.57161300 | 1.69366500  | -1.25623600 |
| C | -1.68234200 | 1.19102600  | -2.67425300 |
| C | -4.43711100 | 1.27190100  | -2.26744100 |
| H | -3.97808900 | 2.04823600  | -0.30569500 |
| C | -2.54802000 | 0.78343000  | -3.68639900 |
| H | -0.59856500 | 1.13821800  | -2.81858300 |
| C | -3.92860000 | 0.81869400  | -3.48346600 |
| H | -5.51737700 | 1.30020200  | -2.10234000 |
| H | -2.14309700 | 0.42479200  | -4.63615400 |
| H | -4.60773000 | 0.48648800  | -4.27249000 |
| C | -1.99577400 | 2.32030900  | 1.34059300  |

|   |             |             |             |
|---|-------------|-------------|-------------|
| C | -2.56546100 | 3.51817500  | 1.78831200  |
| C | -2.20619900 | 1.14689600  | 2.07921300  |
| C | -3.33725300 | 3.53906900  | 2.95072000  |
| H | -2.40129800 | 4.44299000  | 1.22993300  |
| C | -2.98957600 | 1.16741900  | 3.23049500  |
| H | -1.74250500 | 0.21262500  | 1.74769500  |
| C | -3.55422700 | 2.36546200  | 3.67063900  |
| H | -3.77103900 | 4.48157500  | 3.29468400  |
| H | -3.15248100 | 0.24210700  | 3.78833500  |
| H | -4.15885300 | 2.38507700  | 4.58101600  |
| C | 6.10694800  | 0.24508200  | 2.52485900  |
| C | 5.28582500  | -0.11565700 | 1.45592800  |
| C | 3.89386400  | -0.01960300 | 1.57050200  |
| C | 3.33954100  | 0.45294500  | 2.76857700  |
| C | 4.16068000  | 0.80147400  | 3.83805300  |
| C | 5.54720600  | 0.69943600  | 3.71769900  |
| H | 7.19263200  | 0.17088300  | 2.42213300  |
| H | 5.73311200  | -0.46857600 | 0.52330500  |
| H | 2.25284300  | 0.55708500  | 2.84830100  |
| H | 3.71575300  | 1.16650600  | 4.76716100  |
| H | 6.19254000  | 0.98261800  | 4.55313100  |
| C | -2.97981300 | -4.89295900 | -1.06133200 |
| C | -2.27717400 | -5.30172300 | -2.19262400 |
| C | -1.62819800 | -4.36206700 | -2.99337100 |
| C | -1.69290300 | -3.01123100 | -2.65304800 |
| C | -2.39563200 | -2.60226600 | -1.52184200 |
| C | -3.05011600 | -3.53695600 | -0.70391700 |
| H | -3.50591600 | -5.63572100 | -0.45662700 |
| H | -2.24449600 | -6.36213700 | -2.45561700 |
| H | -1.07508900 | -4.68143000 | -3.87996500 |
| H | -1.18466700 | -2.26358400 | -3.26698600 |
| H | -2.41411800 | -1.54141200 | -1.25961700 |

**IS3'**

|    |             |             |             |
|----|-------------|-------------|-------------|
| Pd | 0.09958900  | -0.54086500 | -0.79783300 |
| P  | 2.06035800  | 0.52178200  | 0.11518600  |
| P  | -1.75097400 | 0.94057600  | -0.22342100 |
| C  | 2.55632000  | 2.19814000  | -0.46612000 |
| C  | 3.88508900  | 2.64674900  | -0.42296100 |
| C  | 1.57075400  | 3.05841200  | -0.96362900 |
| C  | 4.21147800  | 3.93078500  | -0.85529800 |
| H  | 4.67271400  | 1.98263200  | -0.05893500 |
| C  | 1.89709700  | 4.34411100  | -1.39159600 |
| H  | 0.53513900  | 2.71914700  | -1.01402400 |

|   |             |             |             |
|---|-------------|-------------|-------------|
| C | 3.21847500  | 4.78319900  | -1.33792900 |
| H | 5.25121900  | 4.26553900  | -0.81788500 |
| H | 1.11157700  | 5.00124000  | -1.77230800 |
| H | 3.47737000  | 5.78888600  | -1.67857500 |
| C | 3.63419500  | -0.41010300 | -0.06822100 |
| C | 4.27956700  | -1.01822600 | 1.01294800  |
| C | 4.17588900  | -0.55342500 | -1.35365300 |
| C | 5.44860800  | -1.75406300 | 0.81260600  |
| H | 3.87113300  | -0.92187700 | 2.02104300  |
| C | 5.34255500  | -1.28438900 | -1.54944800 |
| H | 3.67392700  | -0.09960300 | -2.21103500 |
| C | 5.98201300  | -1.88871900 | -0.46609100 |
| H | 5.94222500  | -2.22498400 | 1.66648000  |
| H | 5.74685400  | -1.39478400 | -2.55823600 |
| H | 6.89480700  | -2.46903200 | -0.62212400 |
| C | -1.30574600 | -1.84904200 | -1.50534400 |
| C | -1.88486500 | -1.75553700 | -2.77926700 |
| C | -1.72206600 | -2.91042000 | -0.68507900 |
| C | -2.86464200 | -2.65655900 | -3.20471900 |
| H | -1.57537000 | -0.96549100 | -3.46824400 |
| C | -2.69277900 | -3.82012200 | -1.10914800 |
| H | -1.29506300 | -3.03443300 | 0.31357500  |
| C | -3.27747100 | -3.69398100 | -2.36901700 |
| H | -3.30082000 | -2.54943800 | -4.20241800 |
| H | -2.99541400 | -4.63378600 | -0.44311000 |
| H | -4.03753400 | -4.40553800 | -2.70294200 |
| C | -1.59748200 | 2.58190200  | 0.62668900  |
| C | -0.84917200 | 2.67243000  | 1.80897700  |
| C | -2.17523300 | 3.75180100  | 0.11265400  |
| C | -0.69963500 | 3.89029300  | 2.46999600  |
| H | -0.36428800 | 1.78581600  | 2.21921800  |
| C | -2.01457100 | 4.97161500  | 0.76881100  |
| H | -2.75454700 | 3.71672400  | -0.81142800 |
| C | -1.27988200 | 5.04555700  | 1.95050900  |
| H | -0.11224800 | 3.93097400  | 3.39028600  |
| H | -2.47195200 | 5.87145100  | 0.34955800  |
| H | -1.15525100 | 6.00296700  | 2.46245000  |
| C | -2.56481600 | 1.44018500  | -1.79223500 |
| C | -3.93774800 | 1.69245900  | -1.90518500 |
| C | -1.74254800 | 1.64997800  | -2.90686600 |
| C | -4.47537800 | 2.13811200  | -3.11188800 |
| H | -4.59449200 | 1.54187900  | -1.04523400 |
| C | -2.27877700 | 2.10919800  | -4.10837900 |
| H | -0.67233400 | 1.43251100  | -2.83159400 |

|   |             |             |             |
|---|-------------|-------------|-------------|
| C | -3.64787000 | 2.34987800  | -4.21423300 |
| H | -5.54954300 | 2.32394600  | -3.18915400 |
| H | -1.62434200 | 2.26706200  | -4.96906200 |
| H | -4.07208700 | 2.69942100  | -5.15878900 |
| C | -3.07541900 | 0.11167400  | 0.75606700  |
| C | -3.16880000 | 0.29242400  | 2.14449300  |
| C | -3.93357300 | -0.81054100 | 0.13881500  |
| C | -4.09429400 | -0.43249000 | 2.89690800  |
| H | -2.52241300 | 1.00998400  | 2.65284300  |
| C | -4.86977300 | -1.51815400 | 0.89203200  |
| H | -3.86892700 | -0.99229700 | -0.93589700 |
| C | -4.95081300 | -1.33874300 | 2.27083400  |
| H | -4.14135800 | -0.28465000 | 3.97843000  |
| H | -5.52515900 | -2.23264300 | 0.38873700  |
| H | -5.67675300 | -1.90496100 | 2.85933300  |
| C | 2.46866300  | 1.79399300  | 4.04214800  |
| C | 2.60724600  | 1.70201700  | 2.65774800  |
| C | 1.93986900  | 0.69897100  | 1.94471500  |
| C | 1.13348200  | -0.21244000 | 2.64264900  |
| C | 0.99206000  | -0.11661000 | 4.02771400  |
| C | 1.65998300  | 0.88804100  | 4.72817400  |
| H | 2.99193600  | 2.58418300  | 4.58676800  |
| H | 3.22877400  | 2.42722400  | 2.12793600  |
| H | 0.58569500  | -0.98721400 | 2.09612400  |
| H | 0.33596800  | -0.81262500 | 4.55609600  |
| H | 1.54410200  | 0.96865300  | 5.81200100  |
| C | 1.78931300  | -3.04126600 | -0.90017800 |
| C | 2.61993400  | -3.99695200 | -1.48803400 |
| C | 2.93422200  | -3.91927200 | -2.84447200 |
| C | 2.40175700  | -2.87958600 | -3.60544500 |
| C | 1.56916200  | -1.92742400 | -3.01254400 |
| C | 1.25646700  | -1.98138100 | -1.64666500 |
| H | 1.55697200  | -3.13070000 | 0.16566600  |
| H | 3.02429800  | -4.81086500 | -0.87904600 |
| H | 3.58147600  | -4.66922100 | -3.30676700 |
| H | 2.62630300  | -2.81246400 | -4.67435700 |
| H | 1.14654300  | -1.13616500 | -3.64000700 |
| O | -1.60371300 | -2.28023500 | 5.09950900  |
| H | -1.34306500 | -2.66957700 | 5.94022200  |
| B | -1.23858900 | -3.08410700 | 4.05243600  |
| O | -1.52813000 | -2.72665100 | 2.77280300  |
| H | -2.08997400 | -1.94334400 | 2.69987500  |
| O | -0.56064700 | -4.24092100 | 4.30536800  |
| H | -0.37017900 | -4.72200600 | 3.49368400  |

**TS3'**

|    |             |             |             |
|----|-------------|-------------|-------------|
| Pd | 0.11156300  | -0.50767600 | -0.75743500 |
| P  | 2.08287500  | 0.47593000  | 0.19277000  |
| P  | -1.74026400 | 0.99434700  | -0.33919200 |
| C  | 2.73140900  | 2.06411200  | -0.47954500 |
| C  | 4.08938900  | 2.41241700  | -0.43480500 |
| C  | 1.82330500  | 2.96130100  | -1.05583600 |
| C  | 4.52210200  | 3.63605300  | -0.94304800 |
| H  | 4.81582500  | 1.71604600  | -0.00879700 |
| C  | 2.25622400  | 4.18763200  | -1.55772000 |
| H  | 0.76510500  | 2.69660500  | -1.10850600 |
| C  | 3.60667200  | 4.52765300  | -1.50227200 |
| H  | 5.58376900  | 3.89298900  | -0.90362400 |
| H  | 1.53125000  | 4.87642600  | -1.99817300 |
| H  | 3.94869000  | 5.48591000  | -1.90147800 |
| C  | 3.57997000  | -0.58879900 | 0.14256300  |
| C  | 4.13133500  | -1.17934600 | 1.28529200  |
| C  | 4.15643300  | -0.85813300 | -1.10683200 |
| C  | 5.24661200  | -2.01170600 | 1.18118200  |
| H  | 3.69335500  | -0.98595700 | 2.26702500  |
| C  | 5.27570100  | -1.67844800 | -1.20576600 |
| H  | 3.72170200  | -0.42975200 | -2.01345700 |
| C  | 5.82482300  | -2.25838700 | -0.06186300 |
| H  | 5.66778200  | -2.46439700 | 2.08255500  |
| H  | 5.71053900  | -1.87910500 | -2.18760800 |
| H  | 6.70062300  | -2.90738000 | -0.14122100 |
| C  | -1.00622900 | -2.11809700 | -1.45297100 |
| C  | -1.76932800 | -2.10347200 | -2.63697700 |
| C  | -1.41305400 | -3.01213700 | -0.44129900 |
| C  | -2.87544600 | -2.93391700 | -2.80052400 |
| H  | -1.48629800 | -1.44167200 | -3.45894300 |
| C  | -2.51556700 | -3.84809900 | -0.60677000 |
| H  | -0.86180800 | -3.06069700 | 0.50103100  |
| C  | -3.25588200 | -3.81951400 | -1.78878600 |
| H  | -3.44230600 | -2.89387300 | -3.73510400 |
| H  | -2.79902400 | -4.52312800 | 0.20573500  |
| H  | -4.11357300 | -4.48290200 | -1.92582200 |
| C  | -1.59507200 | 2.72607900  | 0.29417600  |
| C  | -0.79515300 | 2.96532900  | 1.42137200  |
| C  | -2.21828800 | 3.81758900  | -0.32679200 |
| C  | -0.64117900 | 4.25433800  | 1.92812100  |
| H  | -0.27311800 | 2.13838700  | 1.90597300  |
| C  | -2.05178300 | 5.10864400  | 0.17352500  |
| H  | -2.83780100 | 3.66394700  | -1.21218300 |



|   |             |             |             |
|---|-------------|-------------|-------------|
| C | -1.26733300 | 5.33162700  | 1.30377600  |
| H | -0.01379200 | 4.41274300  | 2.80852500  |
| H | -2.54393200 | 5.94672700  | -0.32667800 |
| H | -1.13904900 | 6.34463100  | 1.69326200  |
| C | -2.60880600 | 1.26917400  | -1.93595400 |
| C | -3.99667300 | 1.41145400  | -2.05605000 |
| C | -1.81339800 | 1.38680700  | -3.08356300 |
| C | -4.57446900 | 1.65965500  | -3.30072600 |
| H | -4.63301200 | 1.32548600  | -1.17209100 |
| C | -2.39015300 | 1.64908500  | -4.32461000 |
| H | -0.72924200 | 1.25916400  | -2.99686700 |
| C | -3.77386800 | 1.78111800  | -4.43597600 |
| H | -5.65963800 | 1.76099300  | -3.38243800 |
| H | -1.75626700 | 1.73932000  | -5.21019900 |
| H | -4.22988900 | 1.97549500  | -5.40997000 |
| C | -3.02482700 | 0.26566700  | 0.75944600  |
| C | -3.18469200 | 0.68080600  | 2.08971300  |
| C | -3.77217000 | -0.83036700 | 0.30025300  |
| C | -4.06915800 | 0.01617600  | 2.93999300  |
| H | -2.61845300 | 1.53191500  | 2.47262500  |
| C | -4.66856500 | -1.47884600 | 1.14813900  |
| H | -3.65324300 | -1.19047400 | -0.72442600 |
| C | -4.81741500 | -1.06416700 | 2.47083300  |
| H | -4.16864000 | 0.34483800  | 3.97699900  |
| H | -5.23831400 | -2.33019100 | 0.76840500  |
| H | -5.50941100 | -1.58384400 | 3.13786700  |
| C | 2.38706200  | 2.04745500  | 4.02416800  |
| C | 2.59187100  | 1.82933400  | 2.66209000  |
| C | 1.90444800  | 0.80639200  | 1.99694700  |
| C | 1.01045600  | 0.00521800  | 2.72297300  |
| C | 0.80571500  | 0.22423200  | 4.08573700  |
| C | 1.49366200  | 1.24809900  | 4.73704800  |
| H | 2.92681000  | 2.85241200  | 4.52982300  |
| H | 3.28172900  | 2.47241300  | 2.11084400  |
| H | 0.44812000  | -0.78323900 | 2.21157400  |
| H | 0.08731500  | -0.39231100 | 4.63174300  |
| H | 1.32737100  | 1.42790500  | 5.80225100  |
| C | 1.61930800  | -3.16733900 | -1.14619900 |
| C | 2.58487900  | -3.91708900 | -1.81131200 |
| C | 2.92203600  | -3.62928400 | -3.13501400 |
| C | 2.28214400  | -2.56978200 | -3.77823900 |
| C | 1.30892800  | -1.82481700 | -3.11392200 |
| C | 0.94799100  | -2.10456100 | -1.78013800 |
| H | 1.36520900  | -3.42911500 | -0.11586400 |

|             |             |             |             |
|-------------|-------------|-------------|-------------|
| H           | 3.08132100  | -4.73837300 | -1.28701700 |
| H           | 3.67175100  | -4.22675900 | -3.65956800 |
| H           | 2.53177900  | -2.32596100 | -4.81511400 |
| H           | 0.80117500  | -1.02099100 | -3.65537100 |
| O           | -1.81158000 | -1.88019100 | 5.21565900  |
| H           | -1.58173500 | -2.16938900 | 6.10436600  |
| B           | -1.38641800 | -2.78426600 | 4.27972300  |
| O           | -1.61544600 | -2.57129800 | 2.95590000  |
| H           | -2.16214900 | -1.79565400 | 2.77548300  |
| O           | -0.71108100 | -3.89793600 | 4.68821100  |
| H           | -0.46849700 | -4.45632500 | 3.94296100  |
| <b>FS3'</b> |             |             |             |
| Pd          | 0.01290200  | -0.23982400 | -0.49150800 |
| P           | -2.18486300 | 0.32011100  | -0.82727300 |
| P           | 1.91624600  | -1.49452700 | -0.26995500 |
| C           | -2.60383600 | 1.14921700  | -2.41495300 |
| C           | -3.70219300 | 2.00395200  | -2.57249000 |
| C           | -1.77186800 | 0.89740300  | -3.51475100 |
| C           | -3.96609200 | 2.58951400  | -3.81052600 |
| H           | -4.35138400 | 2.21948200  | -1.71989800 |
| C           | -2.04345200 | 1.47548700  | -4.75326900 |
| H           | -0.90008500 | 0.24817800  | -3.38167800 |
| C           | -3.14042200 | 2.32433800  | -4.90247000 |
| H           | -4.82257200 | 3.25944200  | -3.92131600 |
| H           | -1.38897400 | 1.26957300  | -5.60399400 |
| H           | -3.34840700 | 2.78635600  | -5.87089600 |
| C           | -3.05621800 | 1.36727900  | 0.41453600  |
| C           | -4.23003200 | 0.97013800  | 1.06627600  |
| C           | -2.48208700 | 2.60272000  | 0.74721200  |
| C           | -4.81666000 | 1.79492900  | 2.02938200  |
| H           | -4.68764900 | 0.00676400  | 0.83131100  |
| C           | -3.07246900 | 3.42794900  | 1.70017400  |
| H           | -1.55383900 | 2.91955400  | 0.26514400  |
| C           | -4.24118200 | 3.02438000  | 2.34741500  |
| H           | -5.73149200 | 1.46941600  | 2.53164200  |
| H           | -2.60513900 | 4.38335400  | 1.95008600  |
| H           | -4.70085700 | 3.66709900  | 3.10240900  |
| C           | 1.60713300  | 3.59660000  | 1.46594500  |
| C           | 1.73365300  | 4.54482300  | 2.49421000  |
| C           | 0.97893700  | 2.37781100  | 1.76829500  |
| C           | 1.25494400  | 4.28263800  | 3.77556600  |
| H           | 2.19127500  | 5.51398000  | 2.28094200  |
| C           | 0.49039700  | 2.11640700  | 3.04723800  |
| H           | 0.86808900  | 1.60629100  | 0.99268700  |

|   |             |             |             |
|---|-------------|-------------|-------------|
| C | 0.63079400  | 3.06773200  | 4.05761000  |
| H | 1.36027400  | 5.04005600  | 4.55675500  |
| H | -0.01076100 | 1.16430700  | 3.24434100  |
| H | 0.24817200  | 2.86529600  | 5.06124300  |
| C | 2.04918100  | -2.83547600 | -1.52503300 |
| C | 0.85644700  | -3.35080200 | -2.05204700 |
| C | 3.27055400  | -3.35892900 | -1.96640600 |
| C | 0.88477000  | -4.38463000 | -2.98600100 |
| H | -0.09668000 | -2.92009300 | -1.72742400 |
| C | 3.29652500  | -4.38463400 | -2.91104200 |
| H | 4.20953600  | -2.95790200 | -1.57754500 |
| C | 2.10559100  | -4.90213200 | -3.41902400 |
| H | -0.05281700 | -4.77876800 | -3.38595400 |
| H | 4.25617000  | -4.78021500 | -3.25348100 |
| H | 2.12925700  | -5.70521100 | -4.16010100 |
| C | 3.57998500  | -0.71360700 | -0.29285800 |
| C | 4.67677500  | -1.21763000 | 0.41967700  |
| C | 3.74264700  | 0.44235200  | -1.06629700 |
| C | 5.91432600  | -0.57988900 | 0.34796400  |
| H | 4.56090300  | -2.10872600 | 1.04223800  |
| C | 4.98108800  | 1.07731600  | -1.13916200 |
| H | 2.88334200  | 0.85811900  | -1.59966400 |
| C | 6.06875000  | 0.56610800  | -0.43240200 |
| H | 6.76261600  | -0.97849900 | 0.91035000  |
| H | 5.08505300  | 1.98632500  | -1.73640400 |
| H | 7.03842600  | 1.06820200  | -0.48017200 |
| C | 1.93651200  | -2.41740600 | 1.32566300  |
| C | 1.87229100  | -3.81225300 | 1.40945000  |
| C | 1.94950500  | -1.66615400 | 2.51296500  |
| C | 1.81536600  | -4.44405100 | 2.65377100  |
| H | 1.86065100  | -4.41251400 | 0.49675600  |
| C | 1.90412100  | -2.29979000 | 3.75269200  |
| H | 1.99330700  | -0.57385000 | 2.46476600  |
| C | 1.83028800  | -3.69345300 | 3.82630000  |
| H | 1.75754800  | -5.53432600 | 2.70244500  |
| H | 1.91887500  | -1.70058300 | 4.66663500  |
| H | 1.78230700  | -4.18995300 | 4.79833500  |
| C | -5.00216500 | -2.61033000 | -1.69045900 |
| C | -4.26973400 | -1.42326300 | -1.74481200 |
| C | -3.21251400 | -1.20734300 | -0.85398600 |
| C | -2.89949900 | -2.20004700 | 0.08585700  |
| C | -3.64395600 | -3.37469600 | 0.15208800  |
| C | -4.69578600 | -3.58420100 | -0.74105300 |
| H | -5.82077100 | -2.77244900 | -2.39641800 |

|   |             |             |             |
|---|-------------|-------------|-------------|
| H | -4.52108400 | -0.66430300 | -2.48968500 |
| H | -2.05640600 | -2.04099400 | 0.76445500  |
| H | -3.38955100 | -4.12571300 | 0.90385600  |
| H | -5.27446000 | -4.51060500 | -0.70076700 |
| C | 1.45557900  | 3.37266300  | -1.03424200 |
| C | 1.91243600  | 3.66158700  | -2.31807800 |
| C | 3.03658900  | 4.46652400  | -2.50125100 |
| C | 3.70073100  | 4.97564500  | -1.38530200 |
| C | 3.24110200  | 4.68770800  | -0.10249300 |
| C | 2.10669200  | 3.88534800  | 0.09962500  |
| H | 0.57462600  | 2.73515900  | -0.91641600 |
| H | 1.37691700  | 3.25709100  | -3.18089900 |
| H | 3.39288900  | 4.69683000  | -3.50844100 |
| H | 4.58929000  | 5.59933100  | -1.51352700 |
| H | 3.78682300  | 5.07405800  | 0.76153300  |
| O | -2.46634400 | -3.04849800 | 3.61953600  |
| H | -3.35700000 | -3.35128700 | 3.82209300  |
| B | -2.43680600 | -1.68687900 | 3.49409100  |
| O | -1.26793900 | -1.04948600 | 3.19770600  |
| H | -0.52253900 | -1.64719200 | 3.05918300  |
| O | -3.58475500 | -0.97060100 | 3.66300500  |
| H | -3.46304200 | -0.03693100 | 3.45382700  |

(4) The optimized structures involved in Suzuki-Miyaura cross-coupling mechanism catalyzed by ZrO superatom

#### IS1

|    |             |             |             |
|----|-------------|-------------|-------------|
| Zr | 1.35509100  | 0.57317100  | -0.00011900 |
| O  | 2.21661800  | 2.10290700  | 0.00005000  |
| C  | 0.95149400  | -1.58583300 | -1.21713200 |
| C  | -0.24615500 | -0.91727900 | -1.22398100 |
| C  | -0.75683300 | -0.28872700 | 0.00006400  |
| C  | -0.24592300 | -0.91688800 | 1.22417900  |
| C  | 0.95171000  | -1.58557400 | 1.21731300  |
| C  | 1.74378000  | -1.70765800 | 0.00011400  |
| H  | 1.33383100  | -1.99548900 | -2.14494200 |
| H  | -0.81204500 | -0.81073100 | -2.14126400 |
| H  | -0.81157400 | -0.81029400 | 2.14160400  |
| H  | 1.33392500  | -1.99494900 | 2.14530000  |
| H  | 2.61874000  | -2.34190900 | -0.00000100 |
| Br | -2.57108300 | 0.29185800  | 0.00000900  |

#### TS1

|    |             |            |             |
|----|-------------|------------|-------------|
| Zr | 0.12970700  | 1.49213100 | -0.38656700 |
| O  | -0.15861600 | 2.19316800 | 1.17052300  |

|    |             |             |             |
|----|-------------|-------------|-------------|
| C  | 2.13286200  | -1.32151700 | -1.07113100 |
| C  | 0.76016400  | -1.12375200 | -1.11738000 |
| C  | 0.04689500  | -0.81164900 | 0.07189800  |
| C  | 0.76143100  | -0.72592700 | 1.29027600  |
| C  | 2.12988500  | -0.91734700 | 1.29606400  |
| C  | 2.82875500  | -1.23403200 | 0.12777900  |
| H  | 2.65748300  | -1.55600100 | -1.99067300 |
| H  | 0.22017500  | -1.23713000 | -2.05094000 |
| H  | 0.23114500  | -0.48679500 | 2.20263200  |
| H  | 2.66237100  | -0.81879300 | 2.23513800  |
| H  | 3.89867500  | -1.39349300 | 0.15515000  |
| Br | -1.87283300 | -0.99808600 | 0.05606200  |

### FS1

|    |             |             |             |
|----|-------------|-------------|-------------|
| Zr | -0.63361700 | 0.74959300  | -0.39391800 |
| O  | -0.79677800 | 2.31144400  | 0.33176200  |
| C  | 3.09777200  | -1.65877400 | -0.33083500 |
| C  | 1.79069500  | -1.19677600 | -0.40165800 |
| C  | 1.44617000  | 0.10752000  | -0.00963400 |
| C  | 2.47835800  | 0.92777000  | 0.47118600  |
| C  | 3.78608400  | 0.47364100  | 0.54543300  |
| C  | 4.09581200  | -0.81953700 | 0.14283600  |
| H  | 3.33753600  | -2.67134000 | -0.63684800 |
| H  | 1.02475200  | -1.88554600 | -0.75747600 |
| H  | 2.25057700  | 1.93785600  | 0.79808200  |
| H  | 4.56791800  | 1.12431400  | 0.92227400  |
| H  | 5.11835900  | -1.17574800 | 0.20412700  |
| Br | -2.42141700 | -0.93736700 | 0.28767100  |

### IM

|    |             |             |             |
|----|-------------|-------------|-------------|
| C  | -2.97552900 | 1.13310200  | 0.21272600  |
| C  | -1.58936400 | 1.18759900  | 0.17765300  |
| C  | -0.81003700 | 0.03431600  | -0.00063100 |
| C  | -1.50012600 | -1.18148200 | -0.13074400 |
| C  | -2.88677700 | -1.24747900 | -0.09801300 |
| C  | -3.62573900 | -0.08584900 | 0.07328500  |
| H  | -3.55257800 | 2.04075400  | 0.35583700  |
| H  | -1.10059600 | 2.14979500  | 0.30228100  |
| H  | -0.94898100 | -2.11410800 | -0.24571900 |
| H  | -3.39144400 | -2.20266200 | -0.19903000 |
| H  | -4.70903500 | -0.13091200 | 0.10430500  |
| Zr | 1.42009500  | 0.04395800  | -0.26481000 |
| O  | 2.02125300  | 1.58690600  | 0.28262300  |
| O  | 2.26700500  | -1.46046500 | 0.65704900  |

|   |            |             |            |
|---|------------|-------------|------------|
| H | 2.91818400 | -1.55396700 | 1.35169900 |
|---|------------|-------------|------------|

## IS2

|    |             |             |             |
|----|-------------|-------------|-------------|
| C  | -4.44154400 | -0.19632200 | -0.45509900 |
| C  | -3.13896500 | -0.60940700 | -0.70176400 |
| C  | -2.03121800 | 0.10790200  | -0.22481500 |
| C  | -2.30738800 | 1.27268900  | 0.50708600  |
| C  | -3.60519600 | 1.70163400  | 0.75285000  |
| C  | -4.67655000 | 0.96102300  | 0.27402500  |
| H  | -5.27680000 | -0.77368200 | -0.83803000 |
| H  | -2.98044200 | -1.51001400 | -1.28833800 |
| H  | -1.49144800 | 1.88099800  | 0.89621900  |
| H  | -3.78249400 | 2.61137200  | 1.31731200  |
| H  | -5.69295000 | 1.28819700  | 0.46500700  |
| Zr | 0.10551800  | -0.50652600 | -0.64634400 |
| O  | 0.03464700  | -1.73583100 | -1.88882000 |
| O  | 1.39713500  | 1.09156200  | -1.28199300 |
| H  | 1.81436200  | 1.09729700  | -2.15035200 |
| C  | 1.57536600  | -2.23723100 | 1.00497600  |
| C  | 2.37021000  | -1.20163200 | 0.51045300  |
| C  | 2.12933400  | 0.13895500  | 0.85748100  |
| C  | 1.13836900  | 0.39051500  | 1.81814100  |
| C  | 0.32005000  | -0.62873300 | 2.29488200  |
| C  | 0.51237300  | -1.94170300 | 1.85588300  |
| H  | 1.73786800  | -3.25540600 | 0.67260800  |
| H  | 3.13217300  | -1.41364400 | -0.23321400 |
| H  | 0.94869000  | 1.42076100  | 2.09963200  |
| H  | -0.49966200 | -0.40317400 | 2.96664900  |
| H  | -0.15678700 | -2.72763200 | 2.18490400  |
| B  | 2.57947000  | 1.32315300  | -0.18148100 |
| O  | 3.74647400  | 1.07129000  | -0.97016000 |
| H  | 4.51597900  | 1.49892200  | -0.59270500 |
| O  | 2.44219800  | 2.58257600  | 0.44846300  |
| H  | 2.58077300  | 3.30835300  | -0.16303400 |

## TS2

|   |            |            |             |
|---|------------|------------|-------------|
| C | 4.45352800 | 0.89201200 | -0.61211000 |
| C | 3.19267300 | 0.50132400 | -1.04159000 |
| C | 2.20526200 | 0.05904400 | -0.14659300 |
| C | 2.56663600 | 0.02349100 | 1.21024100  |
| C | 3.82683500 | 0.40561200 | 1.65309700  |
| C | 4.77273900 | 0.84456400 | 0.73826600  |
| H | 5.19274200 | 1.23088100 | -1.33081700 |
| H | 2.97237300 | 0.53994600 | -2.10500100 |

|    |             |             |             |
|----|-------------|-------------|-------------|
| H  | 1.85001100  | -0.32117500 | 1.95586800  |
| H  | 4.07236400  | 0.36182500  | 2.70940200  |
| H  | 5.75824700  | 1.14664000  | 1.07630400  |
| Zr | 0.13453700  | -0.63918900 | -0.76548000 |
| O  | 0.04459300  | -0.79939900 | -2.50113400 |
| O  | -0.90670700 | -2.41391500 | 0.06924000  |
| H  | -1.47163600 | -2.92323200 | -0.52159800 |
| C  | -3.60458400 | 1.89185900  | -0.58671300 |
| C  | -2.98636200 | 0.65274100  | -0.62324900 |
| C  | -1.76945600 | 0.41598800  | 0.03059900  |
| C  | -1.19803700 | 1.50377300  | 0.70940100  |
| C  | -1.79895700 | 2.75918900  | 0.74006100  |
| C  | -3.00961600 | 2.94850600  | 0.09533000  |
| H  | -4.54722500 | 2.04504400  | -1.10139900 |
| H  | -3.46464200 | -0.15440000 | -1.17021600 |
| H  | -0.24793900 | 1.38646200  | 1.23632200  |
| H  | -1.32655000 | 3.57929100  | 1.26981500  |
| H  | -3.49066200 | 3.92009700  | 0.11659400  |
| B  | -1.66705700 | -1.67553800 | 1.04646300  |
| O  | -2.99513000 | -2.00371000 | 1.08149100  |
| H  | -3.51914100 | -1.53254500 | 1.73006500  |
| O  | -0.83368500 | -1.29551500 | 2.08328200  |
| H  | -1.20066900 | -0.62188400 | 2.65808900  |

## FS2

|    |             |             |             |
|----|-------------|-------------|-------------|
| C  | 4.04727500  | -1.67446300 | 0.87920000  |
| C  | 2.88339000  | -0.96279000 | 1.13853700  |
| C  | 1.91881300  | -0.72406200 | 0.14724200  |
| C  | 2.20057300  | -1.24300500 | -1.12612200 |
| C  | 3.36101000  | -1.95558600 | -1.40271500 |
| C  | 4.28858100  | -2.17247300 | -0.39421500 |
| H  | 4.76934400  | -1.84481500 | 1.67158000  |
| H  | 2.71645300  | -0.58622200 | 2.14409100  |
| H  | 1.49352100  | -1.10144700 | -1.94508100 |
| H  | 3.54035900  | -2.34628000 | -2.39941300 |
| H  | 5.19595600  | -2.73061000 | -0.59923900 |
| Zr | -0.00694300 | 0.44404100  | 0.46362500  |
| O  | -0.01659200 | 1.01834200  | 2.11830000  |
| O  | 0.99448200  | 2.28763300  | -0.78066700 |
| H  | 1.89220300  | 2.62540400  | -0.81988500 |
| C  | -4.07827500 | -1.66562600 | 0.76660300  |
| C  | -2.93503100 | -0.93146700 | 1.05379200  |
| C  | -1.88722700 | -0.79090500 | 0.13049400  |
| C  | -2.06013600 | -1.43779900 | -1.10299400 |

|   |             |             |             |
|---|-------------|-------------|-------------|
| C | -3.19723000 | -2.17704000 | -1.40566000 |
| C | -4.21176200 | -2.29001800 | -0.46652600 |
| H | -4.86660400 | -1.75837800 | 1.50711800  |
| H | -2.85045200 | -0.46225300 | 2.03059300  |
| H | -1.28079300 | -1.38388600 | -1.86435400 |
| H | -3.29088500 | -2.66887600 | -2.36871600 |
| H | -5.10173400 | -2.86781700 | -0.69233200 |
| B | -0.05957000 | 3.16846000  | -0.70864600 |
| O | 0.10331800  | 4.49515000  | -0.83702200 |
| H | -0.67747300 | 5.04685900  | -0.76301000 |
| O | -1.19632000 | 2.42465400  | -0.49928700 |
| H | -2.02329300 | 2.81954300  | -0.21952000 |

### IS3'

|    |             |             |             |
|----|-------------|-------------|-------------|
| C  | 4.10960600  | -1.58206400 | 0.84465300  |
| C  | 2.93613100  | -0.88626800 | 1.10381900  |
| C  | 1.93313500  | -0.72811100 | 0.13465000  |
| C  | 2.18492400  | -1.31379800 | -1.11592500 |
| C  | 3.35395200  | -2.01259800 | -1.39162200 |
| C  | 4.32107500  | -2.14656300 | -0.40617600 |
| H  | 4.86199000  | -1.68901800 | 1.61974200  |
| H  | 2.79215800  | -0.45861800 | 2.09243500  |
| H  | 1.44596100  | -1.23944900 | -1.91513000 |
| H  | 3.50964300  | -2.45643600 | -2.36985600 |
| H  | 5.23576900  | -2.69267800 | -0.61107300 |
| Zr | 0.00471700  | 0.43673000  | 0.44270800  |
| O  | -0.00958500 | 1.02458400  | 2.09250700  |
| C  | -4.01826000 | -1.74206200 | 0.84617800  |
| C  | -2.86769100 | -1.00905600 | 1.10641300  |
| C  | -1.88183200 | -0.79639400 | 0.13021300  |
| C  | -2.12610500 | -1.36727800 | -1.12845200 |
| C  | -3.27226300 | -2.10255400 | -1.40544700 |
| C  | -4.22319900 | -2.29008600 | -0.41299000 |
| H  | -4.75717800 | -1.89167300 | 1.62718900  |
| H  | -2.72779400 | -0.59625300 | 2.10199200  |
| H  | -1.39922500 | -1.25149700 | -1.93380000 |
| H  | -3.42227200 | -2.53362100 | -2.39026200 |
| H  | -5.11951600 | -2.86554300 | -0.61876700 |
| O  | 0.99068100  | 2.33083700  | -0.74146400 |
| H  | 1.87203600  | 2.71026100  | -0.71127800 |
| B  | -0.10220300 | 3.16502200  | -0.69522600 |
| O  | 0.00971700  | 4.50079400  | -0.77269500 |
| H  | -0.79598300 | 5.01739000  | -0.71401700 |
| O  | -1.21540200 | 2.36819400  | -0.56796100 |



|   |             |            |             |
|---|-------------|------------|-------------|
| H | -2.07338300 | 2.71854200 | -0.32432800 |
|---|-------------|------------|-------------|

**TS3'**

|    |             |             |             |
|----|-------------|-------------|-------------|
| C  | 1.25229400  | 3.22087200  | 0.99818100  |
| C  | 0.89886200  | 1.89039400  | 1.08267200  |
| C  | 0.88059000  | 1.06062400  | -0.06280600 |
| C  | 1.32219300  | 1.63402400  | -1.26858600 |
| C  | 1.69009500  | 2.96744500  | -1.34862900 |
| C  | 1.64897300  | 3.77346100  | -0.21997900 |
| H  | 1.22525600  | 3.83986100  | 1.88898900  |
| H  | 0.60017300  | 1.47402400  | 2.04022700  |
| H  | 1.40208400  | 1.00976100  | -2.15465000 |
| H  | 2.02729600  | 3.37664100  | -2.29554700 |
| H  | 1.94764000  | 4.81376000  | -0.27749200 |
| Zr | -0.76795200 | -0.62246900 | 0.18804100  |
| O  | -1.41880200 | -0.53156500 | 1.82719600  |
| C  | 3.35047200  | -1.82065300 | 0.87288900  |
| C  | 2.43093600  | -0.82815100 | 1.07156600  |
| C  | 1.36434400  | -0.60551600 | 0.15441200  |
| C  | 1.32687200  | -1.47925900 | -0.99555400 |
| C  | 2.31418000  | -2.44778200 | -1.20022400 |
| C  | 3.31563600  | -2.63676500 | -0.27723100 |
| H  | 4.12206400  | -1.98253000 | 1.61861200  |
| H  | 2.49948900  | -0.19670800 | 1.95080900  |
| H  | 0.65666200  | -1.27802300 | -1.83518900 |
| H  | 2.28842400  | -3.04527100 | -2.10635100 |
| H  | 4.07555200  | -3.39206100 | -0.43493200 |
| O  | -2.46052500 | 0.76194700  | -0.80329800 |
| H  | -2.60058200 | 1.68941400  | -0.59361900 |
| B  | -3.45298800 | -0.11355500 | -0.40816200 |
| O  | -4.63623100 | 0.33242800  | 0.04889300  |
| H  | -5.25294100 | -0.31849100 | 0.38739700  |
| O  | -3.02027800 | -1.41000500 | -0.61454100 |
| H  | -3.49411300 | -2.11846100 | -0.17535100 |

**FS3'**

|   |             |            |             |
|---|-------------|------------|-------------|
| C | 0.69585600  | 2.95517700 | -1.11086700 |
| C | -0.25123600 | 1.91618500 | -1.12173700 |
| C | -1.01494200 | 1.59163500 | 0.06720700  |
| C | -0.49908600 | 2.17669900 | 1.27458800  |
| C | 0.48425900  | 3.13260000 | 1.25949600  |
| C | 1.07398500  | 3.57234600 | 0.05582700  |
| H | 1.14673100  | 3.25031600 | -2.05353800 |
| H | -0.57016300 | 1.51779600 | -2.08038500 |

|    |             |             |             |
|----|-------------|-------------|-------------|
| H  | -0.97277700 | 1.92435300  | 2.21693000  |
| H  | 0.78573400  | 3.58573000  | 2.19849500  |
| H  | 1.82113100  | 4.35566800  | 0.06064100  |
| Zr | 0.32618500  | -0.31661700 | -0.09065000 |
| O  | 0.34108100  | -1.38564200 | -1.49065200 |
| C  | -3.44477900 | -1.08349700 | -0.96874000 |
| C  | -2.68693300 | 0.04378400  | -1.00374500 |
| C  | -1.87387200 | 0.44681900  | 0.10830000  |
| C  | -1.76345800 | -0.51517600 | 1.20442500  |
| C  | -2.64687300 | -1.63519000 | 1.22654800  |
| C  | -3.44993200 | -1.93459200 | 0.17217100  |
| H  | -4.08239800 | -1.31895600 | -1.81353600 |
| H  | -2.73859500 | 0.69949900  | -1.86624600 |
| H  | -1.40258400 | -0.17513800 | 2.17216000  |
| H  | -2.66983000 | -2.25320200 | 2.11917000  |
| H  | -4.10121300 | -2.79984700 | 0.20010400  |
| O  | 2.74476900  | -0.18225300 | 0.09182400  |
| H  | 3.34554900  | 0.21698500  | -0.54248700 |
| B  | 2.81790400  | -1.55479000 | 0.22329900  |
| O  | 3.80439900  | -2.26486400 | -0.34874300 |
| H  | 3.75545300  | -3.21975100 | -0.27847000 |
| O  | 1.77552300  | -1.97476900 | 1.02840000  |
| H  | 1.48195000  | -2.88535700 | 0.94918500  |

### IS3

|    |             |             |             |
|----|-------------|-------------|-------------|
| C  | -4.06274700 | 0.17581900  | 1.01422000  |
| C  | -2.89293800 | -0.52587100 | 0.76256900  |
| C  | -1.85912600 | 0.01985400  | -0.01316200 |
| C  | -2.06254900 | 1.31324000  | -0.51890400 |
| C  | -3.23027700 | 2.02459000  | -0.27527000 |
| C  | -4.23270600 | 1.45232300  | 0.49384900  |
| H  | -4.84452500 | -0.26908700 | 1.62088600  |
| H  | -2.77475700 | -1.51977300 | 1.18404100  |
| H  | -1.29087400 | 1.80195700  | -1.11449900 |
| H  | -3.35686200 | 3.02412300  | -0.67780300 |
| H  | -5.14582700 | 2.00316300  | 0.69185300  |
| Zr | 0.00001000  | -1.07971100 | -0.59046500 |
| O  | 0.00011600  | -2.55197000 | 0.33115500  |
| C  | 4.06286400  | 0.17570000  | 1.01388400  |
| C  | 2.89301600  | -0.52592900 | 0.76223500  |
| C  | 1.85905700  | 0.02001300  | -0.01315200 |
| C  | 2.06236600  | 1.31355600  | -0.51853700 |
| C  | 3.23012700  | 2.02484600  | -0.27489300 |
| C  | 4.23270900  | 1.45236200  | 0.49386600  |

|   |            |             |             |
|---|------------|-------------|-------------|
| H | 4.84475500 | -0.26937700 | 1.62027900  |
| H | 2.77492000 | -1.51995200 | 1.18344300  |
| H | 1.29056700 | 1.80244100  | -1.11382700 |
| H | 3.35662100 | 3.02450600  | -0.67714100 |
| H | 5.14585700 | 2.00315700  | 0.69187000  |

### TS3

|    |             |             |             |
|----|-------------|-------------|-------------|
| C  | 3.15374800  | -0.53361600 | 1.04307200  |
| C  | 1.86406300  | -0.04271900 | 1.03909700  |
| C  | 1.02644400  | -0.21134300 | -0.08415600 |
| C  | 1.52880200  | -0.96084500 | -1.16013100 |
| C  | 2.82206100  | -1.45950600 | -1.15010300 |
| C  | 3.64243500  | -1.24306300 | -0.05281900 |
| H  | 3.78936900  | -0.36644000 | 1.90593000  |
| H  | 1.49269800  | 0.50498500  | 1.89990600  |
| H  | 0.88054700  | -1.18552000 | -2.00358900 |
| H  | 3.18451000  | -2.03724800 | -1.99376200 |
| H  | 4.64959200  | -1.64307800 | -0.03715400 |
| Zr | -0.42218400 | 1.60453200  | -0.33817800 |
| O  | -0.36553800 | 2.61079800  | 1.08919700  |
| C  | -2.18871800 | -1.97379800 | 1.31816300  |
| C  | -1.08570600 | -1.16836200 | 1.33631600  |
| C  | -0.71643800 | -0.39220000 | 0.20025500  |
| C  | -1.56618100 | -0.52640800 | -0.97101700 |
| C  | -2.65329000 | -1.41084100 | -0.96908400 |
| C  | -2.98442700 | -2.11642100 | 0.16031000  |
| H  | -2.46023600 | -2.51376100 | 2.21928200  |
| H  | -0.48320900 | -1.09372100 | 2.23453500  |
| H  | -1.23794600 | -0.16838800 | -1.95129300 |
| H  | -3.22626400 | -1.54233900 | -1.88150800 |
| H  | -3.83415500 | -2.78742200 | 0.16175500  |

### FS3

|   |            |             |             |
|---|------------|-------------|-------------|
| C | 2.84123500 | 0.01299000  | 1.21363000  |
| C | 1.43827200 | -0.09730600 | 1.25736500  |
| C | 0.73142900 | -0.97880700 | 0.34779200  |
| C | 1.52507100 | -1.44148700 | -0.75851600 |
| C | 2.88193700 | -1.24276000 | -0.81535700 |
| C | 3.57434500 | -0.54589100 | 0.19753500  |
| H | 3.33724200 | 0.57952500  | 1.99516200  |
| H | 0.91740900 | 0.29634600  | 2.12466100  |
| H | 1.05102100 | -2.05102400 | -1.51968900 |
| H | 3.43700300 | -1.67057500 | -1.64397400 |
| H | 4.64986600 | -0.43385100 | 0.15357900  |

|    |             |             |             |
|----|-------------|-------------|-------------|
| Zr | 0.11758500  | 1.08563300  | -0.48800600 |
| O  | -0.74859900 | 2.26748300  | 0.45214600  |
| C  | -2.89170800 | -0.70608500 | 1.31230200  |
| C  | -1.54261900 | -0.81731600 | 1.42019100  |
| C  | -0.69983900 | -0.95213600 | 0.26574100  |
| C  | -1.35173800 | -0.80162500 | -1.03296400 |
| C  | -2.77717500 | -0.76143100 | -1.08586100 |
| C  | -3.53106300 | -0.69340000 | 0.04183300  |
| H  | -3.49288300 | -0.65433600 | 2.21287200  |
| H  | -1.08153000 | -0.86432900 | 2.40060600  |
| H  | -0.85437200 | -1.17583400 | -1.92396700 |
| H  | -3.25572200 | -0.79233500 | -2.05935700 |
| H  | -4.61151800 | -0.64723900 | -0.01897700 |

(5) The optimized structures involved in Suzuki-Miyaura cross-coupling mechanism catalyzed by (ZrO)<sub>2</sub> cluster

**IS1**

|    |             |             |             |
|----|-------------|-------------|-------------|
| C  | -0.71872100 | 2.27011000  | -0.64322100 |
| C  | 0.45751300  | 1.66600600  | -0.95335700 |
| C  | 1.01742400  | 0.71803500  | -0.00587100 |
| C  | 0.72168100  | 0.98511500  | 1.43522300  |
| C  | -0.48821300 | 1.56942300  | 1.69334500  |
| C  | -1.37148400 | 2.00172700  | 0.64983400  |
| H  | -1.16332200 | 2.97893800  | -1.33535900 |
| H  | 0.95114200  | 1.84645000  | -1.90127600 |
| H  | 1.47285100  | 0.86607000  | 2.20809700  |
| H  | -0.78576400 | 1.72924600  | 2.72600700  |
| H  | -2.18802300 | 2.66020800  | 0.93862700  |
| Br | 2.87257800  | 0.05782600  | -0.26688100 |
| Zr | 0.10952500  | -1.20668000 | 0.38050700  |
| Zr | -2.01333000 | -0.00845700 | -0.46469200 |
| O  | -1.83278700 | -1.18808800 | 1.03140500  |
| O  | -0.71523200 | -1.15714500 | -1.40435100 |

**TS1**

|   |             |            |             |
|---|-------------|------------|-------------|
| C | -0.96320900 | 2.09744900 | -0.84304000 |
| C | 0.24522900  | 1.52259200 | -1.08170200 |
| C | 0.90403300  | 0.81450700 | 0.00602700  |
| C | 0.64364200  | 1.37378400 | 1.35503100  |
| C | -0.57996400 | 1.90280000 | 1.56522800  |
| C | -1.56927100 | 1.98944300 | 0.49624100  |
| H | -1.46843500 | 2.63771900 | -1.63923900 |
| H | 0.69700900  | 1.54016000 | -2.06600200 |

|    |             |             |             |
|----|-------------|-------------|-------------|
| H  | 1.40608700  | 1.34794400  | 2.12319800  |
| H  | -0.84205500 | 2.27335300  | 2.55045300  |
| H  | -2.41275300 | 2.65232100  | 0.68539200  |
| Br | 2.77271500  | 0.23763800  | -0.27350000 |
| Zr | 0.34651200  | -1.33221300 | 0.35463700  |
| Zr | -2.08847900 | -0.13274400 | -0.36098500 |
| O  | -1.45883200 | -1.10500900 | 1.17212100  |
| O  | -0.64479400 | -1.19173900 | -1.27388200 |

### FS1

|    |             |             |             |
|----|-------------|-------------|-------------|
| C  | -2.98347300 | 0.95226400  | -1.20912000 |
| C  | -1.65667100 | 1.32115400  | -1.21287500 |
| C  | -0.83001300 | 1.24366200  | 0.00017900  |
| C  | -1.65675200 | 1.32082500  | 1.21320500  |
| C  | -2.98356000 | 0.95195400  | 1.20925900  |
| C  | -3.63964200 | 0.54431200  | -0.00000400 |
| H  | -3.52706700 | 0.90305300  | -2.14752700 |
| H  | -1.19049700 | 1.55098900  | -2.16399800 |
| H  | -1.19063200 | 1.55038200  | 2.16442100  |
| H  | -3.52721900 | 0.90249900  | 2.14761500  |
| H  | -4.69610900 | 0.31810700  | -0.00007000 |
| Br | 3.53378300  | 0.32937600  | 0.00001800  |
| Zr | 0.96882900  | -0.12287600 | 0.00001800  |
| Zr | -1.60958800 | -0.81509100 | -0.00009700 |
| O  | -0.08876400 | -1.07763600 | 1.31204800  |
| O  | -0.08872000 | -1.07730100 | -1.31227200 |

### IM

|    |             |             |             |
|----|-------------|-------------|-------------|
| C  | 2.44650400  | 0.71909000  | 1.20906100  |
| C  | 1.18104600  | 1.25987600  | 1.21216900  |
| C  | 0.34505200  | 1.28510400  | 0.00112100  |
| C  | 1.18086000  | 1.26191800  | -1.21010500 |
| C  | 2.44631300  | 0.72113900  | -1.20812600 |
| C  | 3.04328700  | 0.22036200  | 0.00000000  |
| H  | 2.98043200  | 0.60290200  | 2.14731700  |
| H  | 0.75171600  | 1.55065500  | 2.16426500  |
| H  | 0.75136800  | 1.55434400  | -2.16162300 |
| H  | 2.98010400  | 0.60659300  | -2.14666100 |
| H  | 4.06521800  | -0.13006700 | -0.00037600 |
| Zr | -1.63921900 | 0.15117800  | 0.00025100  |
| Zr | 0.85113700  | -0.85397600 | -0.00070100 |
| O  | -0.68305000 | -0.93121800 | -1.31557600 |
| O  | -0.68285200 | -0.93356000 | 1.31414900  |
| O  | -3.55727100 | 0.64439400  | 0.00016300  |

|   |             |            |            |
|---|-------------|------------|------------|
| H | -4.47856500 | 0.88561900 | 0.00049100 |
|---|-------------|------------|------------|

## IS2

|    |             |             |             |
|----|-------------|-------------|-------------|
| C  | 3.29354200  | 1.19883200  | 1.37449700  |
| C  | 1.92236800  | 1.13099300  | 1.48032200  |
| C  | 1.05425600  | 1.05267000  | 0.29483100  |
| C  | 1.71868300  | 1.64283700  | -0.87694600 |
| C  | 3.09006800  | 1.71349000  | -0.97738200 |
| C  | 3.93973400  | 1.28219500  | 0.09546400  |
| H  | 3.90360400  | 1.12467500  | 2.26979700  |
| H  | 1.49121100  | 1.00046900  | 2.46670100  |
| H  | 1.12646200  | 1.91343900  | -1.74405200 |
| H  | 3.54207100  | 2.03837100  | -1.90977400 |
| H  | 5.01086800  | 1.40774200  | 0.03039300  |
| Zr | -0.26574300 | -0.77927900 | 0.01915200  |
| Zr | 2.40050700  | -0.62011500 | -0.18880900 |
| O  | 0.96713900  | -1.05852800 | -1.49875700 |
| O  | 1.16608800  | -1.61638700 | 1.04813600  |
| O  | -1.98163200 | -1.79792800 | -1.03418900 |
| H  | -2.34096700 | -1.79487300 | -1.92213400 |
| C  | -2.98277700 | 2.52338600  | 1.14966100  |
| C  | -2.94411900 | 1.13723900  | 1.18165300  |
| C  | -2.86943700 | 0.37579500  | 0.00773500  |
| C  | -2.81271700 | 1.07893600  | -1.20235400 |
| C  | -2.84714300 | 2.46554500  | -1.24456300 |
| C  | -2.93473100 | 3.19044000  | -0.06541600 |
| H  | -3.04088700 | 3.08600300  | 2.07493200  |
| H  | -2.96731800 | 0.62451800  | 2.13791100  |
| H  | -2.74598200 | 0.53371100  | -2.14019500 |
| H  | -2.80386100 | 2.98128000  | -2.19757300 |
| H  | -2.95603100 | 4.27410800  | -0.09336500 |
| B  | -2.88973100 | -1.25936400 | 0.05703700  |
| O  | -2.01290600 | -1.58414500 | 1.25885500  |
| H  | -2.08021500 | -2.51528400 | 1.49121100  |
| O  | -4.13845800 | -1.91675700 | 0.02352200  |
| H  | -4.84906500 | -1.36580000 | 0.35168800  |

## TS2

|   |            |            |             |
|---|------------|------------|-------------|
| C | 3.62773000 | 0.65773900 | 1.52439900  |
| C | 2.26672100 | 0.72224500 | 1.72512800  |
| C | 1.33851400 | 1.13753500 | 0.66320100  |
| C | 2.02742200 | 1.98302000 | -0.32431100 |
| C | 3.38750000 | 1.91459300 | -0.52456800 |
| C | 4.21759300 | 1.06411300 | 0.28097500  |

|    |             |             |             |
|----|-------------|-------------|-------------|
| H  | 4.26236700  | 0.22821900  | 2.29378800  |
| H  | 1.86968400  | 0.33008100  | 2.65491000  |
| H  | 1.44026200  | 2.58797800  | -1.00639800 |
| H  | 3.83569100  | 2.46288800  | -1.34776800 |
| H  | 5.29145000  | 1.07513200  | 0.16223100  |
| Zr | -0.23371900 | -0.32271500 | -0.08742600 |
| Zr | 2.41936500  | -0.45327000 | -0.43101700 |
| O  | 0.86929000  | -0.26762300 | -1.70326500 |
| O  | 1.14827500  | -1.64692900 | 0.53812800  |
| O  | -1.72955100 | -2.16485300 | -0.98153300 |
| H  | -2.31097200 | -2.17736000 | -1.74621700 |
| C  | -4.05141900 | 1.94396200  | 1.18495700  |
| C  | -3.02069800 | 1.01389300  | 1.20198400  |
| C  | -2.47994100 | 0.47192500  | 0.02692700  |
| C  | -3.03748400 | 0.92978100  | -1.17574200 |
| C  | -4.06533200 | 1.86352300  | -1.21321300 |
| C  | -4.57697400 | 2.37016100  | -0.02737700 |
| H  | -4.44463400 | 2.34193500  | 2.11507100  |
| H  | -2.62735500 | 0.70067300  | 2.16760700  |
| H  | -2.66496800 | 0.55141400  | -2.12851300 |
| H  | -4.47034000 | 2.19435300  | -2.16416200 |
| H  | -5.38247000 | 3.09618900  | -0.04750300 |
| B  | -2.39013700 | -1.92172100 | 0.22463400  |
| O  | -1.48319400 | -1.82484700 | 1.30715300  |
| H  | -0.74727600 | -2.45867300 | 1.28984800  |
| O  | -3.71296500 | -2.18943800 | 0.35196000  |
| H  | -4.06326100 | -1.97024700 | 1.21798800  |

## FS2

|    |             |             |             |
|----|-------------|-------------|-------------|
| C  | -3.59015700 | -0.07642700 | 1.52728200  |
| C  | -2.24037400 | -0.00372600 | 1.79465300  |
| C  | -1.26662700 | -0.86639700 | 1.11333500  |
| C  | -1.90678100 | -2.09763800 | 0.62468500  |
| C  | -3.25409800 | -2.15962200 | 0.35168800  |
| C  | -4.11886100 | -1.04349200 | 0.61080700  |
| H  | -4.26024800 | 0.65868500  | 1.96256300  |
| H  | -1.88842700 | 0.79941400  | 2.43201500  |
| H  | -1.28756600 | -2.94505200 | 0.35237000  |
| H  | -3.66309500 | -3.04507200 | -0.12518400 |
| H  | -5.18561200 | -1.13125400 | 0.46329200  |
| Zr | 0.36860600  | -0.00196700 | -0.16635100 |
| Zr | -2.28274700 | -0.00837200 | -0.65760300 |
| O  | -0.66045900 | -0.75864300 | -1.61851300 |
| O  | -1.08239400 | 1.52093200  | -0.33782000 |

|   |             |             |             |
|---|-------------|-------------|-------------|
| O | 1.71214500  | 1.87207300  | -0.00563400 |
| H | 2.64775300  | 1.63536100  | 0.05134100  |
| C | 4.68913500  | -1.15499100 | 1.12614300  |
| C | 3.42805900  | -0.57782400 | 1.04078400  |
| C | 2.47627200  | -0.96611800 | 0.08254500  |
| C | 2.88227800  | -1.98852200 | -0.79216100 |
| C | 4.13956800  | -2.57622400 | -0.72281800 |
| C | 5.04888800  | -2.15830400 | 0.23825600  |
| H | 5.38965700  | -0.82751400 | 1.88790600  |
| H | 3.18139700  | 0.19008300  | 1.77578600  |
| H | 2.19797700  | -2.34622000 | -1.55990000 |
| H | 4.41218700  | -3.36229200 | -1.42000800 |
| H | 6.03144400  | -2.61385700 | 0.29687700  |
| B | 1.46254400  | 3.26381600  | 0.01582800  |
| O | 0.21212600  | 3.71761600  | -0.06257600 |
| H | -0.44339400 | 2.96260800  | -0.16249300 |
| O | 2.57363600  | 4.04272200  | 0.12700500  |
| H | 2.35662100  | 4.97773200  | 0.13355700  |

**IS3'**

|    |             |             |             |
|----|-------------|-------------|-------------|
| C  | 4.40110000  | -1.31630000 | 0.06430000  |
| C  | 3.04660000  | -1.29500000 | 0.36260000  |
| C  | 2.14760000  | -0.51000000 | -0.36860000 |
| C  | 2.67380000  | 0.24930000  | -1.42140000 |
| C  | 4.02910000  | 0.23770000  | -1.73030000 |
| C  | 4.89350000  | -0.54730000 | -0.98310000 |
| H  | 5.07720000  | -1.93560000 | 0.64440000  |
| H  | 2.68650000  | -1.91600000 | 1.17990000  |
| H  | 2.02020000  | 0.87260000  | -2.03520000 |
| H  | 4.40790000  | 0.83480000  | -2.55290000 |
| H  | 5.95200000  | -0.56420000 | -1.21800000 |
| Zr | -0.05160000 | -0.14890000 | -0.19130000 |
| Zr | -2.11970000 | -2.08700000 | -1.06390000 |
| O  | -0.80070000 | -0.98530000 | -1.83870000 |
| O  | -1.52410000 | -1.35600000 | 0.58320000  |
| C  | 0.06970000  | 4.36050000  | -0.13480000 |
| C  | 0.39510000  | 3.01130000  | -0.09800000 |
| C  | -0.56520000 | 2.01590000  | -0.32720000 |
| C  | -1.87320000 | 2.43960000  | -0.59650000 |
| C  | -2.20840000 | 3.78590000  | -0.63520000 |
| C  | -1.23540000 | 4.74800000  | -0.40360000 |
| H  | 0.83310000  | 5.11040000  | 0.04400000  |
| H  | 1.42910000  | 2.74020000  | 0.10810000  |
| H  | -2.65300000 | 1.70480000  | -0.78700000 |



|   |             |             |             |
|---|-------------|-------------|-------------|
| H | -3.22870000 | 4.08640000  | -0.84840000 |
| H | -1.49380000 | 5.80090000  | -0.43410000 |
| O | -1.37110000 | -0.97300000 | 3.23550000  |
| H | -1.64210000 | -1.20570000 | 2.32160000  |
| B | -0.17460000 | -0.37610000 | 3.26890000  |
| O | 0.48180000  | -0.03030000 | 4.40550000  |
| H | -0.00300000 | -0.26970000 | 5.19890000  |
| O | 0.50190000  | -0.06720000 | 2.06980000  |
| H | 1.39050000  | 0.27080000  | 2.23260000  |

**TS3'**

|    |             |             |             |
|----|-------------|-------------|-------------|
| C  | 2.19870000  | -1.95280000 | 2.68230000  |
| C  | 1.63090000  | -0.96420000 | 1.91090000  |
| C  | 1.49580000  | -1.10900000 | 0.50910000  |
| C  | 2.03510000  | -2.27270000 | -0.06650000 |
| C  | 2.61710000  | -3.26040000 | 0.71060000  |
| C  | 2.69620000  | -3.11260000 | 2.08670000  |
| H  | 2.25820000  | -1.82820000 | 3.75790000  |
| H  | 1.26180000  | -0.06660000 | 2.40190000  |
| H  | 2.00500000  | -2.39290000 | -1.14510000 |
| H  | 3.02060000  | -4.14820000 | 0.23600000  |
| H  | 3.15510000  | -3.88300000 | 2.69490000  |
| Zr | -0.33880000 | 0.08100000  | -0.34340000 |
| Zr | -3.01840000 | -1.18560000 | -0.53070000 |
| O  | -1.39200000 | -1.25020000 | -1.46510000 |
| O  | -2.20390000 | 0.11840000  | 0.57990000  |
| C  | 3.55120000  | 1.95330000  | -0.82690000 |
| C  | 2.81610000  | 1.18640000  | 0.03860000  |
| C  | 1.78860000  | 0.32260000  | -0.43130000 |
| C  | 1.58040000  | 0.28720000  | -1.86180000 |
| C  | 2.40710000  | 1.01780000  | -2.72150000 |
| C  | 3.37180000  | 1.86090000  | -2.22260000 |
| H  | 4.29760000  | 2.63170000  | -0.42730000 |
| H  | 3.02400000  | 1.22320000  | 1.10350000  |
| H  | 0.92280000  | -0.45540000 | -2.32570000 |
| H  | 2.27730000  | 0.91130000  | -3.79330000 |
| H  | 3.99710000  | 2.43860000  | -2.89140000 |
| O  | -2.29660000 | 2.56710000  | 1.64920000  |
| H  | -2.46690000 | 1.65190000  | 1.32730000  |
| B  | -1.05560000 | 2.98340000  | 1.37910000  |
| O  | -0.55840000 | 4.19860000  | 1.72720000  |
| H  | -1.20450000 | 4.73880000  | 2.18820000  |
| O  | -0.15390000 | 2.13820000  | 0.69860000  |
| H  | 0.72290000  | 2.53040000  | 0.57690000  |

**FS3'**

|    |             |             |             |
|----|-------------|-------------|-------------|
| C  | 1.89900000  | 2.05340000  | 1.96900000  |
| C  | 0.57260000  | 1.76470000  | 1.53820000  |
| C  | 0.08740000  | 2.34560000  | 0.28560000  |
| C  | 1.09360000  | 2.90070000  | -0.57420000 |
| C  | 2.37960000  | 3.06300000  | -0.15510000 |
| C  | 2.79250000  | 2.66360000  | 1.14470000  |
| H  | 2.19320000  | 1.75730000  | 2.96990000  |
| H  | -0.14930000 | 1.49820000  | 2.30900000  |
| H  | 0.79550000  | 3.26340000  | -1.55170000 |
| H  | 3.09270000  | 3.54100000  | -0.81710000 |
| H  | 3.80820000  | 2.84910000  | 1.47020000  |
| Zr | 0.05610000  | 0.07540000  | -0.10180000 |
| Zr | 2.27740000  | -1.87200000 | -0.51360000 |
| O  | 1.54290000  | -0.32110000 | -1.33380000 |
| O  | 0.91260000  | -1.68050000 | 0.75130000  |
| C  | -3.55020000 | 1.45270000  | 0.38870000  |
| C  | -2.33060000 | 1.93700000  | 0.76230000  |
| C  | -1.23990000 | 2.05250000  | -0.16200000 |
| C  | -1.46970000 | 1.50010000  | -1.48940000 |
| C  | -2.75650000 | 1.05520000  | -1.85010000 |
| C  | -3.77790000 | 0.98330000  | -0.93360000 |
| H  | -4.36240000 | 1.43990000  | 1.10670000  |
| H  | -2.19050000 | 2.31730000  | 1.76830000  |
| H  | -0.74750000 | 1.67940000  | -2.28190000 |
| H  | -2.92680000 | 0.73650000  | -2.87310000 |
| H  | -4.75650000 | 0.62210000  | -1.22380000 |
| O  | -1.24780000 | -3.11020000 | 1.35920000  |
| H  | -0.34230000 | -2.73560000 | 1.25700000  |
| B  | -2.17100000 | -2.36890000 | 0.73930000  |
| O  | -3.48820000 | -2.69400000 | 0.66330000  |
| H  | -3.67760000 | -3.53390000 | 1.08810000  |
| O  | -1.82190000 | -1.15160000 | 0.11410000  |
| H  | -2.59880000 | -0.70040000 | -0.27980000 |

**IS3**

|   |             |             |             |
|---|-------------|-------------|-------------|
| C | 0.01137300  | -4.31061700 | -0.42586900 |
| C | -0.35759100 | -2.97342000 | -0.38097700 |
| C | 0.55630200  | -1.96778200 | -0.03204900 |
| C | 1.86403800  | -2.37315000 | 0.27171600  |
| C | 2.24092100  | -3.70823200 | 0.23607400  |
| C | 1.31295200  | -4.67860300 | -0.11484000 |
| H | -0.71530300 | -5.06730400 | -0.70210100 |

|    |             |             |             |
|----|-------------|-------------|-------------|
| H  | -1.38616600 | -2.71747000 | -0.62711100 |
| H  | 2.61384200  | -1.63157400 | 0.54077400  |
| H  | 3.25933600  | -3.99310200 | 0.47787200  |
| H  | 1.60446800  | -5.72275500 | -0.14740100 |
| Zr | 0.04919900  | 0.20797900  | -0.09658900 |
| Zr | 2.14597200  | 2.22863600  | 0.09165300  |
| O  | 0.97379700  | 1.30552900  | 1.26669100  |
| O  | 1.30005900  | 1.19531500  | -1.26180100 |
| C  | -4.40273000 | 1.28135700  | -0.64398100 |
| C  | -3.05835600 | 1.36015600  | -0.96581400 |
| C  | -2.10766800 | 0.60978900  | -0.26729300 |
| C  | -2.56621600 | -0.20925000 | 0.76906200  |
| C  | -3.91342400 | -0.29512200 | 1.10762400  |
| C  | -4.83050100 | 0.45468400  | 0.39188200  |
| H  | -5.12888900 | 1.86745900  | -1.19714900 |
| H  | -2.74617100 | 2.01709900  | -1.77187800 |
| H  | -1.86857600 | -0.82654500 | 1.35353500  |
| H  | -4.24029000 | -0.93701100 | 1.91808300  |
| H  | -5.88455000 | 0.40096600  | 0.64048300  |

### TS3

|    |             |             |             |
|----|-------------|-------------|-------------|
| C  | 1.59162700  | 3.20696200  | -0.98381400 |
| C  | 1.20759900  | 1.88840300  | -1.06991300 |
| C  | 1.18953500  | 1.05042200  | 0.07090200  |
| C  | 1.65784600  | 1.60151200  | 1.27723600  |
| C  | 2.06028100  | 2.92444000  | 1.35626100  |
| C  | 2.02296400  | 3.73676900  | 0.23346900  |
| H  | 1.56133400  | 3.83471800  | -1.86755500 |
| H  | 0.89268000  | 1.49732800  | -2.03611300 |
| H  | 1.71846100  | 0.97338800  | 2.16058000  |
| H  | 2.41492200  | 3.32122600  | 2.30132600  |
| H  | 2.34288700  | 4.77011200  | 0.29416000  |
| Zr | -0.42284900 | -0.62513900 | -0.14809800 |
| Zr | -3.28083300 | -0.04087500 | 0.04218800  |
| O  | -1.84864100 | -0.29245200 | 1.24260200  |
| O  | -1.98936200 | -0.34432900 | -1.32949800 |
| C  | 3.69813600  | -1.77222900 | -0.95969400 |
| C  | 2.81097900  | -0.73805500 | -1.09668900 |
| C  | 1.72766600  | -0.57440300 | -0.19588300 |
| C  | 1.61287400  | -1.55633300 | 0.85623300  |
| C  | 2.59020300  | -2.54274500 | 1.03033000  |
| C  | 3.61475300  | -2.66973300 | 0.12450300  |
| H  | 4.48820900  | -1.89208600 | -1.69297200 |
| H  | 2.93495700  | -0.02090900 | -1.90129600 |

|   |            |             |            |
|---|------------|-------------|------------|
| H | 0.90235900 | -1.42743500 | 1.68316400 |
| H | 2.52870400 | -3.20570800 | 1.88669500 |
| H | 4.36001900 | -3.44587500 | 0.24594500 |

### FS3

|    |             |             |             |
|----|-------------|-------------|-------------|
| C  | 1.43260900  | 2.76633400  | -1.27057000 |
| C  | 1.58860000  | 1.35697100  | -1.23723500 |
| C  | 2.14491000  | 0.71192800  | -0.05198300 |
| C  | 2.16215400  | 1.53849900  | 1.12363800  |
| C  | 1.88924500  | 2.87903400  | 1.07027700  |
| C  | 1.56115300  | 3.52567100  | -0.14458300 |
| H  | 1.17501800  | 3.23157600  | -2.21609200 |
| H  | 1.63011500  | 0.84510300  | -2.19321100 |
| H  | 2.48331000  | 1.10510300  | 2.06363900  |
| H  | 1.96462500  | 3.46306200  | 1.98103300  |
| H  | 1.40139600  | 4.59563100  | -0.16954100 |
| Zr | -0.04982300 | 0.00003900  | -0.00001100 |
| Zr | -2.98140800 | 0.00036100  | 0.00001300  |
| O  | -1.58572300 | 0.75502100  | 1.03248400  |
| O  | -1.58590700 | -0.75459300 | -1.03248800 |
| C  | 1.88820700  | -2.87953800 | -1.07028200 |
| C  | 2.16156600  | -1.53909100 | -1.12365200 |
| C  | 2.14468100  | -0.71252200 | 0.05197800  |
| C  | 1.58819200  | -1.35738600 | 1.23724200  |
| C  | 1.43171600  | -2.76669000 | 1.27058100  |
| C  | 1.55995800  | -3.52607200 | 0.14458600  |
| H  | 1.96333200  | -3.46358100 | -1.98104900 |
| H  | 2.48282200  | -1.10580700 | -2.06367000 |
| H  | 1.62986700  | -0.84551500 | 2.19320900  |
| H  | 1.17399300  | -3.23184600 | 2.21611000  |
| H  | 1.39983100  | -4.59597600 | 0.16954500  |

(6) The optimized structures involved in Suzuki-Miyaura cross-coupling mechanism catalyzed by (ZrO)<sub>3</sub> cluster

### IS1

|    |             |             |             |
|----|-------------|-------------|-------------|
| Zr | 2.89523800  | 0.75390200  | -0.27504100 |
| Zr | -0.25905700 | 0.62049600  | 0.09086800  |
| Zr | 1.93841200  | -1.65393700 | 0.43305900  |
| O  | 1.27722900  | 1.71801700  | -0.61356200 |
| O  | 0.05474600  | -1.35810100 | 0.31259100  |
| O  | 3.13864000  | -1.05630700 | -1.01345000 |
| C  | -1.91782300 | 2.41873600  | -0.58075000 |
| C  | -1.60682600 | 2.67110200  | 0.72099900  |

|    |             |             |             |
|----|-------------|-------------|-------------|
| C  | -1.57766100 | 1.59496100  | 1.70727700  |
| C  | -2.47268500 | 0.49594100  | 1.34514100  |
| C  | -2.78358700 | 0.26261800  | 0.04024200  |
| C  | -2.22119000 | 1.06254800  | -1.04264200 |
| H  | -1.81608100 | 3.20297000  | -1.32159300 |
| H  | -1.26203900 | 3.65734600  | 1.00855000  |
| H  | -1.46931900 | 1.84110300  | 2.75411800  |
| H  | -2.80093600 | -0.19775800 | 2.10879700  |
| H  | -2.59917400 | 0.91925700  | -2.04442100 |
| Br | -3.80921400 | -1.24873400 | -0.43106200 |

### TS1

|    |             |             |             |
|----|-------------|-------------|-------------|
| Zr | 1.86163700  | 1.34535000  | -0.79248300 |
| Zr | -0.25578500 | 0.02943600  | 0.44524000  |
| Zr | 2.60573400  | -0.79683800 | 0.66871700  |
| O  | 0.23781700  | 1.90151500  | 0.21449400  |
| O  | 0.84404000  | -1.34674800 | 1.33527800  |
| O  | 3.11680500  | -0.21519300 | -1.09227600 |
| C  | -3.42793300 | 1.99923400  | -0.47574300 |
| C  | -3.64037600 | 2.11312300  | 0.89759700  |
| C  | -3.34712000 | 1.05099700  | 1.73825500  |
| C  | -2.85110400 | -0.14880600 | 1.22763100  |
| C  | -2.67383100 | -0.25173300 | -0.16495200 |
| C  | -2.94429000 | 0.82338900  | -1.02232700 |
| H  | -3.63264000 | 2.83922500  | -1.12851500 |
| H  | -4.02085700 | 3.03876600  | 1.31070000  |
| H  | -3.49865600 | 1.14020500  | 2.80756900  |
| H  | -2.70032100 | -1.00731800 | 1.87149200  |
| H  | -2.77573100 | 0.72505600  | -2.08655400 |
| Br | -2.06047500 | -1.88821900 | -0.92846800 |

### FS1

|    |             |             |             |
|----|-------------|-------------|-------------|
| Zr | 2.10139900  | -0.73524000 | 1.33964900  |
| Zr | -0.47048800 | 0.52104400  | -0.00000100 |
| Zr | 2.10121200  | -0.73574500 | -1.33952500 |
| O  | 0.44018800  | 0.16177300  | 1.72303700  |
| O  | 0.43999500  | 0.16120100  | -1.72302000 |
| O  | 3.39832600  | -0.09899900 | -0.00015700 |
| C  | -3.99992400 | -2.00996500 | 1.20089900  |
| C  | -4.57516700 | -2.40168000 | 0.00023900  |
| C  | -4.00028800 | -2.00945600 | -1.20042800 |
| C  | -2.85255400 | -1.22896800 | -1.19578400 |
| C  | -2.24867300 | -0.81728200 | 0.00022800  |
| C  | -2.85219600 | -1.22946900 | 1.19624700  |

|    |             |             |             |
|----|-------------|-------------|-------------|
| H  | -4.44719500 | -2.31456600 | 2.14134900  |
| H  | -5.47097700 | -3.01317000 | 0.00024400  |
| H  | -4.44783800 | -2.31365600 | -2.14087400 |
| H  | -2.42087900 | -0.93860400 | -2.15071600 |
| H  | -2.42023900 | -0.93949800 | 2.15116800  |
| Br | -1.17523000 | 2.96875000  | -0.00038200 |

## IM

|    |             |             |             |
|----|-------------|-------------|-------------|
| Zr | -1.94456300 | 1.26819100  | -0.71542600 |
| Zr | 0.54515100  | 0.11086600  | 0.97552800  |
| Zr | -1.95858700 | -1.38179400 | -0.40274400 |
| O  | -0.36592100 | 1.74085100  | 0.28007100  |
| O  | -0.37427900 | -1.62755000 | 0.66778400  |
| O  | -3.29847700 | 0.01463000  | -0.01657400 |
| C  | 4.53737100  | 1.06534200  | -0.93747200 |
| C  | 5.08067200  | -0.16740800 | -1.27021700 |
| C  | 4.36791100  | -1.32711500 | -1.00177200 |
| C  | 3.11757800  | -1.24887600 | -0.40238600 |
| C  | 2.54142100  | -0.02038600 | -0.05306500 |
| C  | 3.28633900  | 1.13136700  | -0.33859300 |
| H  | 5.09027400  | 1.97567200  | -1.14559100 |
| H  | 6.05738300  | -0.22395600 | -1.73862600 |
| H  | 4.78773800  | -2.29372600 | -1.26098600 |
| H  | 2.58172200  | -2.17475300 | -0.20622000 |
| H  | 2.88690900  | 2.11325000  | -0.09299500 |
| O  | 0.85599000  | 0.33462900  | 2.86383600  |
| H  | 0.78967200  | 0.41498700  | 3.81021700  |

## IS2

|    |             |             |             |
|----|-------------|-------------|-------------|
| Zr | -0.78453000 | -1.46177000 | -1.24466600 |
| Zr | 0.88594400  | 0.27656400  | 0.38164700  |
| Zr | 1.42670300  | -2.70945600 | 0.03651600  |
| O  | -0.26001400 | 0.40280800  | -1.21838500 |
| O  | 1.74386200  | -1.28422200 | 1.29407900  |
| O  | -0.33346000 | -3.27879600 | -0.43351700 |
| C  | 4.69827600  | 2.69372700  | 0.62861500  |
| C  | 4.61766100  | 3.60551300  | -0.41455300 |
| C  | 3.54055600  | 3.55672400  | -1.28883500 |
| C  | 2.54973400  | 2.59972300  | -1.11662900 |
| C  | 2.59934500  | 1.66218400  | -0.07352500 |
| C  | 3.70237600  | 1.73955700  | 0.79094000  |
| H  | 5.54105300  | 2.72424300  | 1.31183000  |
| H  | 5.39463400  | 4.35064000  | -0.54778800 |
| H  | 3.47601100  | 4.26535000  | -2.10835500 |

|   |             |             |             |
|---|-------------|-------------|-------------|
| H | 1.72002800  | 2.57918800  | -1.81872600 |
| H | 3.80080800  | 1.02873400  | 1.60975000  |
| O | -2.69220300 | -0.29929500 | 2.67972700  |
| H | -3.57321000 | 0.03980500  | 2.83741300  |
| C | -3.60661400 | 3.41079000  | -0.13053300 |
| C | -2.80148300 | 2.52405700  | 0.57000600  |
| C | -3.04939300 | 1.15105900  | 0.56389100  |
| C | -4.14955700 | 0.70283000  | -0.17281600 |
| C | -4.96258900 | 1.58094800  | -0.87583500 |
| C | -4.69028900 | 2.94093500  | -0.85797300 |
| H | -3.38464300 | 4.47240300  | -0.11385500 |
| H | -1.95347900 | 2.90841900  | 1.12745900  |
| H | -4.37834900 | -0.35921700 | -0.19521700 |
| H | -5.80901100 | 1.20412400  | -1.44023200 |
| H | -5.31898300 | 3.63128400  | -1.40940000 |
| B | -2.17737500 | 0.11777800  | 1.41619400  |
| O | -1.92735300 | -1.14806700 | 0.58109200  |
| O | -0.76393500 | 0.68134000  | 1.73614500  |
| H | -0.69597400 | 0.65886500  | 2.69685200  |
| H | -1.88001800 | -1.90467300 | 1.17977800  |

## TS2

|    |             |             |             |
|----|-------------|-------------|-------------|
| Zr | -2.36379300 | -0.35151400 | -1.12915600 |
| Zr | 0.35124400  | -0.18808300 | -0.00382900 |
| Zr | -2.12152600 | -1.43644700 | 1.40039200  |
| O  | -0.53871900 | -0.27426700 | -1.80276000 |
| O  | -0.36265300 | -0.72287800 | 1.77556900  |
| O  | -3.43847500 | -0.30393100 | 0.62072000  |
| C  | 3.99723800  | -2.76975900 | 0.62580900  |
| C  | 4.35575400  | -3.21660700 | -0.63828700 |
| C  | 3.57842200  | -2.87117900 | -1.73505300 |
| C  | 2.44932000  | -2.08121500 | -1.56405100 |
| C  | 2.06009100  | -1.61062400 | -0.30172600 |
| C  | 2.86638900  | -1.97989100 | 0.78510500  |
| H  | 4.59958200  | -3.03958400 | 1.48744000  |
| H  | 5.23770600  | -3.83474400 | -0.76798800 |
| H  | 3.85312700  | -3.22116500 | -2.72508700 |
| H  | 1.85247700  | -1.83082400 | -2.43752300 |
| H  | 2.60698500  | -1.65046800 | 1.78947800  |
| O  | -0.38691400 | 2.54375600  | -2.13136300 |
| H  | -0.32061400 | 1.62283500  | -2.42233100 |
| C  | 2.39637600  | 2.78864900  | 2.11698600  |
| C  | 1.22984800  | 2.27243300  | 1.57156500  |
| C  | 1.10488800  | 2.00102900  | 0.19613900  |

|   |             |            |             |
|---|-------------|------------|-------------|
| C | 2.23460400  | 2.26293400 | -0.59684400 |
| C | 3.40682900  | 2.77908900 | -0.06268700 |
| C | 3.48706100  | 3.04393700 | 1.29702600  |
| H | 2.45590600  | 2.99543200 | 3.18022300  |
| H | 0.38940000  | 2.08694300 | 2.23570800  |
| H | 2.18529900  | 2.08448900 | -1.66751600 |
| H | 4.25755100  | 2.97709400 | -0.70578800 |
| H | 4.40087800  | 3.44780200 | 1.71895600  |
| B | -0.72762200 | 2.62515300 | -0.79793000 |
| O | -1.74689200 | 1.67041900 | -0.33773600 |
| O | -0.90336200 | 3.84909200 | -0.18493300 |
| H | -2.17778800 | 1.94817500 | 0.47940600  |
| H | -0.32419800 | 4.51968700 | -0.55143700 |

## FS2

|    |             |             |             |
|----|-------------|-------------|-------------|
| Zr | 1.26559100  | -1.60681500 | 1.22303200  |
| Zr | -0.83097400 | 0.17259400  | -0.11798400 |
| Zr | 0.52373100  | -2.37824500 | -1.30587300 |
| O  | -0.00259900 | -0.24478800 | 1.66354400  |
| O  | -0.50044200 | -0.80917300 | -1.81635600 |
| O  | 2.25191400  | -2.44378100 | -0.45599000 |
| C  | -5.29959500 | 0.12606300  | -0.68543500 |
| C  | -5.84610000 | -0.01343400 | 0.58215200  |
| C  | -5.00888600 | -0.13621300 | 1.68269600  |
| C  | -3.63128100 | -0.11867400 | 1.51142400  |
| C  | -3.04596800 | 0.02116800  | 0.24533700  |
| C  | -3.91992300 | 0.14100000  | -0.84459100 |
| H  | -5.94956900 | 0.22064100  | -1.54938000 |
| H  | -6.92288600 | -0.02787000 | 0.71244600  |
| H  | -5.43294500 | -0.24677000 | 2.67565800  |
| H  | -2.99832000 | -0.22112800 | 2.38953000  |
| H  | -3.52216000 | 0.24264100  | -1.85307000 |
| O  | 3.07592900  | 2.09799300  | 1.04461000  |
| H  | 2.11066900  | 2.11640100  | 1.01525600  |
| C  | 0.88875600  | 4.09042300  | -1.76515800 |
| C  | 0.45105800  | 2.77857300  | -1.64466100 |
| C  | -0.07364300 | 2.28015100  | -0.44308000 |
| C  | -0.13305100 | 3.17701500  | 0.63651400  |
| C  | 0.30372400  | 4.49247500  | 0.52744800  |
| C  | 0.81631600  | 4.94979500  | -0.67725000 |
| H  | 1.28906100  | 4.44646500  | -2.70890100 |
| H  | 0.51811500  | 2.12810500  | -2.51334600 |
| H  | -0.53172700 | 2.84858600  | 1.59537400  |
| H  | 0.24518300  | 5.15914400  | 1.38150000  |



|   |            |             |             |
|---|------------|-------------|-------------|
| H | 1.16221900 | 5.97360300  | -0.76771400 |
| B | 3.66094700 | 0.97351300  | 0.60746800  |
| O | 2.91992700 | -0.22080300 | 0.49941400  |
| O | 4.98462400 | 0.99800200  | 0.30450700  |
| H | 5.37802600 | 0.14595800  | 0.11267300  |
| H | 3.17242100 | -0.90432700 | -0.16459500 |

**IS3'**

|    |             |             |             |
|----|-------------|-------------|-------------|
| Zr | 1.83230000  | -1.29990000 | 0.69650000  |
| Zr | -0.85210000 | -0.00250000 | -0.16990000 |
| Zr | 0.89360000  | -2.06570000 | -1.75660000 |
| O  | 0.54400000  | 0.02240000  | 1.30240000  |
| O  | -0.69560000 | -0.98470000 | -1.89060000 |
| O  | 2.61360000  | -1.36370000 | -1.12090000 |
| C  | -5.08180000 | -1.41010000 | 0.62080000  |
| C  | -5.27340000 | -1.20270000 | 1.97960000  |
| C  | -4.23420000 | -0.70460000 | 2.75250000  |
| C  | -3.01040000 | -0.41640000 | 2.16320000  |
| C  | -2.78340000 | -0.61320000 | 0.79350000  |
| C  | -3.85390000 | -1.11870000 | 0.04220000  |
| H  | -5.89160000 | -1.80000000 | 0.01260000  |
| H  | -6.23100000 | -1.42980000 | 2.43560000  |
| H  | -4.37910000 | -0.54100000 | 3.81550000  |
| H  | -2.21390000 | -0.03110000 | 2.79660000  |
| H  | -3.73260000 | -1.29530000 | -1.02430000 |
| C  | -1.21840000 | 3.82910000  | -2.57390000 |
| C  | -1.14140000 | 2.50030000  | -2.17840000 |
| C  | -0.89260000 | 2.13880000  | -0.84640000 |
| C  | -0.71960000 | 3.18570000  | 0.07040000  |
| C  | -0.79330000 | 4.51790000  | -0.31430000 |
| C  | -1.04440000 | 4.84100000  | -1.64020000 |
| H  | -1.41470000 | 4.07760000  | -3.61200000 |
| H  | -1.27850000 | 1.72700000  | -2.93040000 |
| H  | -0.51700000 | 2.96830000  | 1.11720000  |
| H  | -0.65380000 | 5.30490000  | 0.41970000  |
| H  | -1.10330000 | 5.88020000  | -1.94550000 |
| O  | 2.37120000  | 1.73380000  | 2.45930000  |
| H  | 1.59970000  | 1.20740000  | 2.15870000  |
| B  | 3.51090000  | 1.46240000  | 1.81490000  |
| O  | 3.58390000  | 0.27710000  | 1.03540000  |
| O  | 4.57920000  | 2.29100000  | 1.93800000  |
| H  | 5.40470000  | 1.97960000  | 1.56630000  |
| H  | 4.21650000  | 0.27350000  | 0.31030000  |

**TS3'**

|    |             |             |             |
|----|-------------|-------------|-------------|
| Zr | 2.29000000  | -0.46490000 | 1.05100000  |
| Zr | -0.45210000 | -0.15160000 | -0.25890000 |
| Zr | 1.83460000  | -2.00040000 | -1.18350000 |
| O  | 0.58350000  | 0.39360000  | 1.44480000  |
| O  | 0.02370000  | -1.45090000 | -1.66390000 |
| O  | 3.45000000  | -1.16930000 | -0.45450000 |
| C  | -4.21540000 | -2.40720000 | 0.62580000  |
| C  | -4.65230000 | -1.98700000 | 1.88170000  |
| C  | -4.08590000 | -0.85390000 | 2.44830000  |
| C  | -3.09550000 | -0.15410000 | 1.78110000  |
| C  | -2.61250000 | -0.57380000 | 0.52630000  |
| C  | -3.23280000 | -1.71180000 | -0.04530000 |
| H  | -4.64830000 | -3.29260000 | 0.17170000  |
| H  | -5.43290000 | -2.53050000 | 2.40080000  |
| H  | -4.42470000 | -0.50510000 | 3.41840000  |
| H  | -2.68440000 | 0.74150000  | 2.23700000  |
| H  | -2.90980000 | -2.06580000 | -1.02060000 |
| C  | -3.68320000 | 2.12550000  | -2.16170000 |
| C  | -3.33300000 | 0.90860000  | -1.62940000 |
| C  | -2.37420000 | 0.81440000  | -0.59580000 |
| C  | -1.79070000 | 2.03550000  | -0.14380000 |
| C  | -2.19410000 | 3.26500000  | -0.66320000 |
| C  | -3.13350000 | 3.31930000  | -1.67070000 |
| H  | -4.40320000 | 2.16110000  | -2.97260000 |
| H  | -3.80460000 | 0.00330000  | -1.99560000 |
| H  | -1.09770000 | 2.05310000  | 0.69950000  |
| H  | -1.76090000 | 4.17580000  | -0.26330000 |
| H  | -3.44730000 | 4.27260000  | -2.07810000 |
| O  | 1.57710000  | 2.93920000  | 1.40630000  |
| H  | 1.12700000  | 2.07710000  | 1.57340000  |
| B  | 2.63730000  | 2.83480000  | 0.59920000  |
| O  | 3.15750000  | 1.53570000  | 0.34910000  |
| O  | 3.21580000  | 3.94160000  | 0.06900000  |
| H  | 4.02950000  | 3.80800000  | -0.41760000 |
| H  | 3.73080000  | 1.40040000  | -0.41370000 |

**FS3'**

|    |             |             |             |
|----|-------------|-------------|-------------|
| Zr | -1.20260000 | -0.08760000 | 0.63250000  |
| Zr | 1.07460000  | 0.13070000  | -1.03940000 |
| Zr | 0.04750000  | 2.78330000  | 0.20060000  |
| O  | -0.71190000 | -0.54230000 | -1.33110000 |
| O  | 1.08090000  | 2.12860000  | -1.25890000 |
| O  | -1.58330000 | 1.86710000  | 0.61220000  |

|   |             |             |             |
|---|-------------|-------------|-------------|
| C | -0.50820000 | -0.61220000 | 2.97070000  |
| C | -1.54220000 | -1.49800000 | 2.54520000  |
| C | -1.11720000 | -2.51300000 | 1.60610000  |
| C | 0.05660000  | -2.41400000 | 0.92330000  |
| C | 0.98370000  | -1.28190000 | 1.09420000  |
| C | 0.67380000  | -0.47410000 | 2.27820000  |
| H | -0.70030000 | 0.06720000  | 3.79470000  |
| H | -2.41710000 | -1.65500000 | 3.15970000  |
| H | -1.77070000 | -3.35400000 | 1.40240000  |
| H | 0.30790000  | -3.17890000 | 0.19920000  |
| H | 1.38070000  | 0.27110000  | 2.61220000  |
| C | 4.58100000  | -0.44750000 | 0.29990000  |
| C | 3.36570000  | -0.46940000 | 0.92760000  |
| C | 2.26910000  | -1.25370000 | 0.44000000  |
| C | 2.48850000  | -1.86660000 | -0.86300000 |
| C | 3.79120000  | -1.91010000 | -1.41790000 |
| C | 4.82580000  | -1.20850000 | -0.87130000 |
| H | 5.38260000  | 0.13830000  | 0.73550000  |
| H | 3.24960000  | 0.08370000  | 1.85110000  |
| H | 1.75880000  | -2.57870000 | -1.24280000 |
| H | 3.94560000  | -2.50190000 | -2.31430000 |
| H | 5.80940000  | -1.22020000 | -1.32300000 |
| O | -2.96230000 | -1.26080000 | -2.41880000 |
| H | -2.03360000 | -1.03470000 | -2.14300000 |
| B | -3.84630000 | -0.99470000 | -1.46300000 |
| O | -3.37290000 | -0.53690000 | -0.20030000 |
| O | -5.18010000 | -1.17260000 | -1.68190000 |
| H | -5.77340000 | -0.98540000 | -0.95530000 |
| H | -4.06230000 | -0.30260000 | 0.42450000  |

### IS3

|    |             |             |             |
|----|-------------|-------------|-------------|
| Zr | 2.40754500  | -0.36900000 | 1.35382600  |
| Zr | -0.42812300 | -0.02192500 | -0.00159400 |
| Zr | 2.42249200  | -0.34045600 | -1.33303900 |
| O  | 0.53688700  | -0.10149300 | 1.73664600  |
| O  | 0.55544600  | -0.05985400 | -1.72953200 |
| O  | 3.40171200  | 0.69400100  | 0.02639400  |
| C  | -3.51953600 | -3.07465000 | -1.25302600 |
| C  | -4.00967200 | -3.59512100 | -0.06370300 |
| C  | -3.48393600 | -3.16232600 | 1.14551100  |
| C  | -2.47168700 | -2.21216400 | 1.15949000  |
| C  | -1.95496000 | -1.66465900 | -0.02328800 |
| C  | -2.50744900 | -2.12450000 | -1.22706800 |
| H  | -3.92777800 | -3.41032400 | -2.20081400 |

|   |             |             |             |
|---|-------------|-------------|-------------|
| H | -4.80039700 | -4.33743500 | -0.07913000 |
| H | -3.86451800 | -3.56698300 | 2.07777000  |
| H | -2.07687100 | -1.89542600 | 2.12252500  |
| H | -2.14216100 | -1.73713200 | -2.17597300 |
| C | -2.28790200 | 3.94741000  | -1.16115400 |
| C | -1.62304500 | 2.72843900  | -1.16875700 |
| C | -1.42481400 | 1.98773700  | 0.00514700  |
| C | -1.92715900 | 2.53785100  | 1.19292600  |
| C | -2.59438700 | 3.75525700  | 1.21200200  |
| C | -2.77572200 | 4.46215700  | 0.03163900  |
| H | -2.42634400 | 4.49825200  | -2.08588900 |
| H | -1.24757800 | 2.35039900  | -2.11682700 |
| H | -1.79375600 | 2.01069700  | 2.13538500  |
| H | -2.97264300 | 4.15507600  | 2.14724200  |
| H | -3.29524100 | 5.41430300  | 0.04160900  |

### TS3

|    |             |             |             |
|----|-------------|-------------|-------------|
| Zr | 2.60799700  | -0.27637100 | 1.32986700  |
| Zr | -0.14673400 | 0.04981900  | -0.05108800 |
| Zr | 2.64255900  | -0.17593800 | -1.35299600 |
| O  | 0.72663300  | -0.24888400 | 1.74554300  |
| O  | 0.74596800  | -0.21178800 | -1.79774500 |
| O  | 3.68441100  | 0.77040600  | 0.03896600  |
| C  | -3.61498100 | -2.60389100 | -1.05006700 |
| C  | -4.24263600 | -2.92809000 | 0.15277000  |
| C  | -3.90952500 | -2.22059700 | 1.29899800  |
| C  | -2.96057300 | -1.21376200 | 1.25412900  |
| C  | -2.28735500 | -0.88593500 | 0.05987400  |
| C  | -2.67624700 | -1.59699900 | -1.10361900 |
| H  | -3.86401600 | -3.15024200 | -1.95391100 |
| H  | -4.99000600 | -3.71177800 | 0.18709000  |
| H  | -4.40063100 | -2.44919700 | 2.23918800  |
| H  | -2.73403700 | -0.66044800 | 2.16055200  |
| H  | -2.20490600 | -1.36853900 | -2.05617900 |
| C  | -3.47741200 | 2.72821100  | -1.01029600 |
| C  | -3.02734400 | 1.43523500  | -1.11322200 |
| C  | -2.15442300 | 0.88790300  | -0.14699000 |
| C  | -1.76062200 | 1.74203100  | 0.92771600  |
| C  | -2.27649100 | 3.03326700  | 1.04647500  |
| C  | -3.12649000 | 3.53359900  | 0.08478700  |
| H  | -4.12114200 | 3.12904500  | -1.78606200 |
| H  | -3.35210400 | 0.81386700  | -1.94075400 |
| H  | -1.13482300 | 1.37564200  | 1.74714600  |
| H  | -2.00079900 | 3.63919800  | 1.90327400  |

|   |             |            |            |
|---|-------------|------------|------------|
| H | -3.52188600 | 4.53833600 | 0.17090600 |
|---|-------------|------------|------------|

### FS3

|    |             |             |             |
|----|-------------|-------------|-------------|
| Zr | 0.44824700  | 2.74916200  | 0.33657400  |
| Zr | 1.35992200  | -0.27800600 | -0.51255500 |
| Zr | -1.48980000 | 0.26777000  | -0.41372800 |
| O  | 1.79210200  | 1.70255500  | -0.47948300 |
| O  | -0.19608400 | -0.18753300 | -1.78859700 |
| O  | -1.27176900 | 2.23330500  | -0.29322500 |
| C  | 2.53618700  | -2.49173000 | -0.58260800 |
| C  | 3.31214000  | -1.71960300 | 0.35455200  |
| C  | 2.69423800  | -1.22291700 | 1.48262000  |
| C  | 1.28647200  | -1.27341600 | 1.63776800  |
| C  | 0.49429200  | -2.12385500 | 0.73563100  |
| C  | 1.19611100  | -2.78426800 | -0.30569100 |
| H  | 3.02324800  | -2.96205400 | -1.42632500 |
| H  | 4.36868400  | -1.56298500 | 0.18232200  |
| H  | 3.26962400  | -0.64218700 | 2.19530500  |
| H  | 0.85344900  | -0.88708900 | 2.54569200  |
| H  | 0.65221200  | -3.38615800 | -1.02182800 |
| C  | -3.02126400 | -1.92309500 | -0.57205100 |
| C  | -1.76216200 | -2.41696400 | -0.36265700 |
| C  | -0.91422900 | -1.91345800 | 0.69816500  |
| C  | -1.59724400 | -1.10635100 | 1.68637700  |
| C  | -2.89553200 | -0.65899500 | 1.48188600  |
| C  | -3.58448000 | -0.92017700 | 0.27593400  |
| H  | -3.58258300 | -2.26207900 | -1.43556800 |
| H  | -1.35760200 | -3.11959700 | -1.07748900 |
| H  | -1.08399100 | -0.81467700 | 2.59030900  |
| H  | -3.34281600 | -0.00600600 | 2.22321400  |
| H  | -4.59612900 | -0.57181300 | 0.12363000  |

(7) The optimized structures involved in Suzuki-Miyaura cross-coupling mechanism catalyzed by (ZrO)<sub>4</sub> cluster

### IS1

|    |             |             |             |
|----|-------------|-------------|-------------|
| Zr | 2.16183900  | -0.88896400 | -1.19538300 |
| Zr | -0.36246500 | -1.23771400 | 0.35146200  |
| O  | 3.14363700  | -0.62207800 | 0.50144600  |
| O  | 1.69168700  | 0.83632400  | -1.90729700 |
| O  | 0.78305300  | -2.23456200 | -0.97010800 |
| Zr | 1.92736800  | 0.18736700  | 1.76121900  |
| Zr | 0.29924200  | 1.40922500  | -0.54040200 |
| O  | 1.50285900  | 1.88576200  | 1.06840800  |
| C  | -1.72858700 | 2.21125400  | 0.58983300  |

|    |             |             |             |
|----|-------------|-------------|-------------|
| C  | -1.64548600 | 0.80237000  | 0.97083700  |
| C  | -2.23265600 | -0.19402100 | 0.06657600  |
| C  | -1.70676700 | 0.12146400  | -1.27500500 |
| C  | -1.78883700 | 1.51394400  | -1.71950100 |
| C  | -1.91988700 | 2.52541600  | -0.75364800 |
| H  | -1.72227900 | 2.98305800  | 1.34849800  |
| H  | -1.70458300 | 0.62392100  | 2.04732100  |
| H  | -1.82174000 | -0.61671100 | -2.06667900 |
| H  | -1.85506000 | 1.74198400  | -2.77607400 |
| H  | -2.05645400 | 3.55648500  | -1.06212300 |
| Br | -4.07759500 | -0.79689700 | 0.30340200  |

### TS1

|    |             |             |             |
|----|-------------|-------------|-------------|
| Zr | 2.01071200  | -0.86947100 | -1.28662500 |
| Zr | -0.67925600 | -1.13002500 | 0.07764000  |
| O  | 2.91846500  | -1.09880700 | 0.45966100  |
| O  | 1.85404500  | 1.01360200  | -1.67989800 |
| O  | 0.41504200  | -1.95304900 | -1.40211000 |
| Zr | 1.72825400  | -0.33461100 | 1.77173200  |
| Zr | 0.48606700  | 1.55993000  | -0.29041000 |
| O  | 1.65110700  | 1.51745800  | 1.40275800  |
| C  | -1.43270600 | 2.50803000  | 0.97677500  |
| C  | -1.63308500 | 1.06549900  | 1.06304400  |
| C  | -2.11455800 | 0.36452300  | -0.08052000 |
| C  | -1.69721000 | 0.90234600  | -1.34172800 |
| C  | -1.51096500 | 2.34393000  | -1.45346700 |
| C  | -1.48369500 | 3.11384100  | -0.27711400 |
| H  | -1.29842000 | 3.09637200  | 1.87444400  |
| H  | -1.78791500 | 0.64180000  | 2.05398500  |
| H  | -1.85284900 | 0.33491300  | -2.25328100 |
| H  | -1.47494500 | 2.82008700  | -2.42499800 |
| H  | -1.38915900 | 4.19229800  | -0.35254100 |
| Br | -3.70010800 | -1.07831500 | 0.18982000  |

### FS1

|    |             |             |             |
|----|-------------|-------------|-------------|
| Zr | 0.53778300  | -1.89323800 | -1.24384200 |
| Zr | -1.29284200 | 0.50688500  | -0.49512700 |
| O  | 0.03711500  | -2.98656700 | 0.32805400  |
| O  | 2.22019800  | -0.93996000 | -1.02378900 |
| O  | -0.84828700 | -0.70723300 | -1.96562100 |
| Zr | -0.23316100 | -1.50120300 | 1.56776100  |
| Zr | 1.87048900  | 0.44364400  | 0.37088000  |
| O  | 1.38538000  | -0.57333000 | 2.01056300  |
| C  | 2.06805900  | 2.91439500  | 1.08080300  |

|    |             |            |             |
|----|-------------|------------|-------------|
| C  | 0.74320700  | 2.67428700 | 0.79671400  |
| C  | 0.31249500  | 2.00892300 | -0.42429200 |
| C  | 1.34466100  | 2.08120000 | -1.46009500 |
| C  | 2.66838500  | 2.34852000 | -1.18484700 |
| C  | 3.10905500  | 2.56236300 | 0.14958400  |
| H  | 2.34475900  | 3.30301900 | 2.05517600  |
| H  | 0.00796800  | 2.87074000 | 1.57242500  |
| H  | 1.07837300  | 1.80437700 | -2.47429700 |
| H  | 3.40234900  | 2.28011000 | -1.98078600 |
| H  | 4.14018700  | 2.80686600 | 0.36121500  |
| Br | -3.71699400 | 1.10885500 | 0.11253000  |

## IM

|    |             |             |             |
|----|-------------|-------------|-------------|
| Zr | -1.42258900 | -0.90329300 | -1.35822700 |
| Zr | -0.51421400 | 1.86099000  | -0.12725500 |
| O  | -2.55630200 | -1.44656800 | 0.17601200  |
| O  | 0.34562500  | -1.71840100 | -1.37655000 |
| O  | -1.30431400 | 1.01870100  | -1.72216000 |
| Zr | -1.45039200 | -0.60622200 | 1.54889700  |
| Zr | 1.33225900  | -0.92077400 | 0.16521200  |
| O  | 0.28787300  | -1.39413000 | 1.79010600  |
| C  | 3.44038600  | 0.21629000  | 1.10658600  |
| C  | 2.46513100  | 1.17980000  | 1.01820000  |
| C  | 1.64881400  | 1.36770900  | -0.17655300 |
| C  | 2.31834800  | 0.80528200  | -1.35629500 |
| C  | 3.31480200  | -0.13972200 | -1.27457100 |
| C  | 3.74809600  | -0.64555600 | -0.01155000 |
| H  | 3.93424000  | 0.03983000  | 2.05640400  |
| H  | 2.20732700  | 1.73038200  | 1.91905700  |
| H  | 1.94123700  | 1.06762100  | -2.33882000 |
| H  | 3.69626400  | -0.59250100 | -2.18384900 |
| H  | 4.56853200  | -1.34613100 | 0.04977200  |
| O  | -1.06600900 | 3.62957400  | 0.47390300  |
| H  | -1.41858700 | 4.45651100  | 0.78691900  |

## IS2

|    |             |             |             |
|----|-------------|-------------|-------------|
| Zr | -0.79374900 | -1.80327900 | 1.56217500  |
| Zr | 0.36661600  | 0.99629000  | 1.04120200  |
| O  | 0.51909200  | -2.74610900 | 0.44164600  |
| O  | -2.45900000 | -1.52355000 | 0.57377200  |
| O  | -0.30086900 | -0.17919600 | 2.52286700  |
| Zr | 0.93071700  | -1.33655600 | -0.88588900 |
| Zr | -2.01929500 | -0.23092100 | -0.85590300 |
| O  | -0.69761200 | -1.11018700 | -1.98447000 |

|   |             |             |             |
|---|-------------|-------------|-------------|
| C | -2.73187200 | 1.97271300  | -2.08095100 |
| C | -1.57983600 | 2.24391600  | -1.37561600 |
| C | -1.41072500 | 1.91032400  | 0.02178400  |
| C | -2.69561600 | 1.67395500  | 0.67289900  |
| C | -3.86569900 | 1.43629600  | -0.02357400 |
| C | -3.86906500 | 1.38858600  | -1.43778400 |
| H | -2.75406700 | 2.12724500  | -3.15479600 |
| H | -0.71553700 | 2.59923100  | -1.93024300 |
| H | -2.71842000 | 1.57122800  | 1.75296400  |
| H | -4.76711000 | 1.17341800  | 0.51967500  |
| H | -4.77926400 | 1.20021200  | -1.98959700 |
| O | 2.30822400  | -0.38324200 | -2.44838400 |
| H | 2.12188600  | 0.38806600  | -2.98455700 |
| C | 1.61927800  | 3.11916700  | 0.32023300  |
| C | 1.99354600  | 2.15522000  | -0.59009400 |
| C | 2.47028300  | 0.83984700  | -0.20974600 |
| C | 2.83571700  | 0.78465100  | 1.20167600  |
| C | 2.51585300  | 1.78321200  | 2.11389600  |
| C | 1.76773800  | 2.91610600  | 1.73486000  |
| H | 1.16807100  | 4.03896200  | -0.03214400 |
| H | 1.81782900  | 2.35420400  | -1.64344100 |
| H | 3.32241100  | -0.10858700 | 1.57882500  |
| H | 2.75515200  | 1.63204600  | 3.16105800  |
| H | 1.54395800  | 3.70611300  | 2.43628400  |
| B | 3.24204300  | -0.12475100 | -1.29093300 |
| O | 4.54047700  | 0.27960200  | -1.66277000 |
| H | 4.82526000  | 1.06498000  | -1.19584400 |
| O | 3.16152800  | -1.55498500 | -0.76698900 |
| H | 3.72565700  | -1.74731600 | -0.01779700 |

## TS2

|    |             |             |             |
|----|-------------|-------------|-------------|
| Zr | 1.39291200  | -1.54822800 | -1.58064600 |
| Zr | -0.57623500 | 0.58888900  | -0.81557000 |
| O  | 0.63811200  | -2.81226200 | -0.28814200 |
| O  | 2.96887500  | -0.69608300 | -0.82941400 |
| O  | 0.02901100  | -0.39294900 | -2.42431000 |
| Zr | -0.01584900 | -1.62655600 | 1.14908500  |
| Zr | 2.20534800  | 0.47697100  | 0.62007300  |
| O  | 1.53729100  | -0.83384700 | 1.97069900  |
| C  | 2.27482300  | 2.81323300  | 1.69349800  |
| C  | 1.01644100  | 2.65119000  | 1.14732700  |
| C  | 0.80289000  | 2.19334300  | -0.21158400 |
| C  | 2.00211600  | 2.37371300  | -1.03067000 |
| C  | 3.26259600  | 2.56477900  | -0.49466900 |



|   |             |             |             |
|---|-------------|-------------|-------------|
| C | 3.45909700  | 2.60151500  | 0.90701700  |
| H | 2.37755100  | 3.03012700  | 2.75155400  |
| H | 0.16096000  | 2.73832200  | 1.81329600  |
| H | 1.92242600  | 2.23626800  | -2.10415500 |
| H | 4.12617600  | 2.56611300  | -1.15116400 |
| H | 4.43919700  | 2.77047500  | 1.32997900  |
| O | -1.91785000 | -0.98866500 | 2.33258700  |
| H | -2.14424600 | -0.26928500 | 2.92442500  |
| C | -3.98229200 | 2.67500200  | 0.14763000  |
| C | -2.96148700 | 1.77675700  | 0.43411700  |
| C | -2.82987000 | 0.53921800  | -0.22322400 |
| C | -3.78622400 | 0.27785200  | -1.22658800 |
| C | -4.82254000 | 1.15576500  | -1.51168300 |
| C | -4.92678900 | 2.35618000  | -0.81667800 |
| H | -4.04871100 | 3.61649500  | 0.68259800  |
| H | -2.24543600 | 2.04776600  | 1.21255300  |
| H | -3.72121700 | -0.63979300 | -1.81048200 |
| H | -5.54401000 | 0.91558000  | -2.28596700 |
| H | -5.73517000 | 3.04405800  | -1.03693200 |
| B | -2.83680700 | -1.19485200 | 1.26241300  |
| O | -4.16017700 | -1.02222500 | 1.56651900  |
| H | -4.73427600 | -0.87189600 | 0.81328500  |
| O | -2.26311600 | -2.28110600 | 0.55302600  |
| H | -2.62597800 | -2.50718400 | -0.30343500 |

## FS2

|    |             |             |             |
|----|-------------|-------------|-------------|
| Zr | 1.35140100  | -2.10516500 | -0.86215100 |
| Zr | -0.25981100 | 0.38907500  | -1.35894400 |
| O  | 0.17580300  | -2.70549100 | 0.60725200  |
| O  | 2.92437100  | -1.20834900 | -0.16352300 |
| O  | 0.45757200  | -1.16955500 | -2.34348300 |
| Zr | -0.41016100 | -1.01678900 | 1.40485900  |
| Zr | 2.21708600  | 0.50009600  | 0.62725300  |
| O  | 1.12420700  | -0.13071200 | 2.16356200  |
| C  | 2.49179100  | 3.04765900  | 0.87191100  |
| C  | 1.32760100  | 2.83384100  | 0.16521800  |
| C  | 1.25659100  | 1.94506400  | -0.98164900 |
| C  | 2.58747900  | 1.70685100  | -1.55167000 |
| C  | 3.75910200  | 1.94350500  | -0.86159100 |
| C  | 3.73373100  | 2.43684500  | 0.46959200  |
| H  | 2.46340100  | 3.62025200  | 1.79313000  |
| H  | 0.40372000  | 3.24107600  | 0.56897600  |
| H  | 2.65815900  | 1.22288500  | -2.52050900 |
| H  | 4.70549200  | 1.63926100  | -1.29615600 |

|   |             |             |             |
|---|-------------|-------------|-------------|
| H | 4.64984100  | 2.65689700  | 0.99902400  |
| O | -1.88149700 | 0.08029600  | 3.06464200  |
| H | -1.74909800 | 0.85424900  | 3.61760200  |
| C | -4.58206600 | 1.98205800  | -0.91440600 |
| C | -3.19995600 | 1.82919500  | -0.97300500 |
| C | -2.57877800 | 0.61066500  | -1.30221000 |
| C | -3.46475700 | -0.44755500 | -1.60151800 |
| C | -4.85027600 | -0.31970800 | -1.52495200 |
| C | -5.41718000 | 0.89806400  | -1.17069200 |
| H | -5.01238700 | 2.94850300  | -0.66815500 |
| H | -2.58872000 | 2.69883800  | -0.73528700 |
| H | -3.06233300 | -1.41268200 | -1.90742100 |
| H | -5.48810300 | -1.16786000 | -1.75349200 |
| H | -6.49442400 | 1.00852000  | -1.11740300 |
| B | -2.91685600 | 0.13644100  | 2.14883800  |
| O | -3.82016500 | 1.12380800  | 2.14076500  |
| H | -4.34276200 | 1.20191000  | 1.32985700  |
| O | -2.81214700 | -0.96682800 | 1.32040000  |
| H | -3.22394700 | -0.86697100 | 0.43783200  |

### IS3'

|    |             |             |             |
|----|-------------|-------------|-------------|
| Zr | -0.97230000 | -1.00340000 | 2.03520000  |
| Zr | 1.21850000  | 0.07710000  | -0.00440000 |
| O  | -1.60020000 | -2.39400000 | 0.79100000  |
| O  | -2.19460000 | 0.47520000  | 2.12880000  |
| O  | 0.92750000  | -0.62630000 | 1.81160000  |
| Zr | -1.58730000 | -1.43870000 | -0.91670000 |
| Zr | -2.13740000 | 1.18240000  | 0.22620000  |
| O  | -3.12700000 | -0.27070000 | -0.77710000 |
| C  | -1.67970000 | 2.21950000  | -2.06020000 |
| C  | -0.60850000 | 1.40790000  | -1.51800000 |
| C  | 0.09220000  | 1.94050000  | -0.30400000 |
| C  | -0.46310000 | 3.03570000  | 0.34880000  |
| C  | -1.72100000 | 3.57180000  | -0.00970000 |
| C  | -2.25280000 | 3.21040000  | -1.31130000 |
| H  | -2.09610000 | 1.97230000  | -3.03040000 |
| H  | -0.02180000 | 0.86600000  | -2.25990000 |
| H  | 0.00180000  | 3.39430000  | 1.26330000  |
| H  | -2.14320000 | 4.41030000  | 0.52750000  |
| H  | -3.11930000 | 3.73800000  | -1.69280000 |
| C  | 5.56370000  | 1.19010000  | -0.84160000 |
| C  | 4.20110000  | 0.92920000  | -0.92110000 |
| C  | 3.47740000  | 0.37670000  | 0.14730000  |
| C  | 4.21050000  | 0.09580000  | 1.31000000  |

|   |             |             |             |
|---|-------------|-------------|-------------|
| C | 5.57450000  | 0.34200000  | 1.40050000  |
| C | 6.25540000  | 0.89210000  | 0.32320000  |
| H | 6.08620000  | 1.62620000  | -1.68740000 |
| H | 3.69310000  | 1.18170000  | -1.85160000 |
| H | 3.70170000  | -0.32940000 | 2.17150000  |
| H | 6.11040000  | 0.10580000  | 2.31450000  |
| H | 7.32000000  | 1.08840000  | 0.39150000  |
| O | 1.48350000  | -3.05220000 | -1.29760000 |
| H | 1.19160000  | -3.47390000 | -0.49010000 |
| B | 0.82460000  | -1.82520000 | -1.58610000 |
| O | 1.78580000  | -0.79490000 | -2.00310000 |
| H | 2.69220000  | -1.11870000 | -2.08460000 |
| O | -0.29220000 | -2.02340000 | -2.59190000 |
| H | -0.16230000 | -2.81050000 | -3.13330000 |

### TS3'

|    |             |             |             |
|----|-------------|-------------|-------------|
| Zr | -1.63150000 | -0.08850000 | 2.05120000  |
| Zr | 0.65200000  | -0.91540000 | 0.25550000  |
| O  | -2.98380000 | -0.88620000 | 0.85700000  |
| O  | -1.46320000 | 1.79010000  | 1.67550000  |
| O  | 0.05980000  | -1.07020000 | 2.15330000  |
| Zr | -2.16050000 | -0.65280000 | -0.91770000 |
| Zr | -0.74820000 | 1.88660000  | -0.23110000 |
| O  | -2.31320000 | 1.25040000  | -1.29860000 |
| C  | 0.73390000  | 2.25350000  | -2.29210000 |
| C  | 1.06090000  | 1.05240000  | -1.62130000 |
| C  | 1.47610000  | 1.08510000  | -0.22200000 |
| C  | 1.64170000  | 2.35160000  | 0.37110000  |
| C  | 1.22800000  | 3.53130000  | -0.27530000 |
| C  | 0.73150000  | 3.46600000  | -1.60220000 |
| H  | 0.34230000  | 2.21460000  | -3.30240000 |
| H  | 1.16890000  | 0.13360000  | -2.19040000 |
| H  | 1.89110000  | 2.40130000  | 1.42750000  |
| H  | 1.28460000  | 4.48500000  | 0.23340000  |
| H  | 0.38730000  | 4.36770000  | -2.09390000 |
| C  | 5.17130000  | -0.67380000 | -0.75700000 |
| C  | 3.81610000  | -0.49170000 | -0.98010000 |
| C  | 2.91150000  | -0.39870000 | 0.08300000  |
| C  | 3.43310000  | -0.45640000 | 1.38720000  |
| C  | 4.78820000  | -0.65070000 | 1.61180000  |
| C  | 5.66430000  | -0.75780000 | 0.54020000  |
| H  | 5.85110000  | -0.75010000 | -1.59970000 |
| H  | 3.45680000  | -0.41550000 | -2.00300000 |
| H  | 2.77150000  | -0.35520000 | 2.24620000  |

|   |             |             |             |
|---|-------------|-------------|-------------|
| H | 5.16270000  | -0.71080000 | 2.62850000  |
| H | 6.72530000  | -0.89660000 | 0.71360000  |
| O | -0.76260000 | -3.87890000 | -0.73040000 |
| H | -1.34210000 | -3.93860000 | 0.02800000  |
| B | -0.55090000 | -2.54310000 | -1.19540000 |
| O | 0.86580000  | -2.34470000 | -1.52830000 |
| H | 1.37210000  | -3.16420000 | -1.56440000 |
| O | -1.50910000 | -2.20170000 | -2.32540000 |
| H | -1.87400000 | -2.98670000 | -2.74920000 |

**FS3'**

|    |             |             |             |
|----|-------------|-------------|-------------|
| Zr | -1.63800000 | -0.20960000 | 1.99440000  |
| Zr | 0.60440000  | -0.90790000 | 0.11820000  |
| O  | -3.12280000 | -0.77760000 | 0.80880000  |
| O  | -1.19330000 | 1.65360000  | 1.77070000  |
| O  | 0.04960000  | -1.21740000 | 1.99140000  |
| Zr | -2.17380000 | -0.49650000 | -0.90760000 |
| Zr | -0.43540000 | 1.87100000  | -0.10840000 |
| O  | -2.05500000 | 1.40480000  | -1.19460000 |
| C  | 0.89900000  | 2.49460000  | -2.16850000 |
| C  | 1.41350000  | 1.30730000  | -1.66670000 |
| C  | 1.89040000  | 1.20240000  | -0.26420000 |
| C  | 1.94400000  | 2.49820000  | 0.43000000  |
| C  | 1.37670000  | 3.63910000  | -0.08440000 |
| C  | 0.70990000  | 3.63690000  | -1.35450000 |
| H  | 0.48670000  | 2.49230000  | -3.17090000 |
| H  | 1.52590000  | 0.45610000  | -2.32780000 |
| H  | 2.39320000  | 2.52260000  | 1.41600000  |
| H  | 1.40160000  | 4.55010000  | 0.50170000  |
| H  | 0.31290000  | 4.55300000  | -1.76590000 |
| C  | 4.60820000  | -1.42890000 | -0.59270000 |
| C  | 3.68430000  | -0.45090000 | -0.92140000 |
| C  | 2.91230000  | 0.18390000  | 0.06860000  |
| C  | 3.08450000  | -0.25400000 | 1.39890000  |
| C  | 4.01660000  | -1.22890000 | 1.71910000  |
| C  | 4.78670000  | -1.82090000 | 0.72800000  |
| H  | 5.20190000  | -1.88360000 | -1.37810000 |
| H  | 3.57860000  | -0.13920000 | -1.95370000 |
| H  | 2.47600000  | 0.18280000  | 2.18470000  |
| H  | 4.12800000  | -1.53520000 | 2.75280000  |
| H  | 5.50670000  | -2.59030000 | 0.97970000  |
| O  | -0.88250000 | -3.77000000 | -0.93560000 |
| H  | -1.38290000 | -3.83880000 | -0.12370000 |
| B  | -0.63920000 | -2.42190000 | -1.35190000 |

|   |             |             |             |
|---|-------------|-------------|-------------|
| O | 0.79860000  | -2.25930000 | -1.67740000 |
| H | 1.25580000  | -3.10730000 | -1.72810000 |
| O | -1.58430000 | -2.00300000 | -2.43670000 |
| H | -2.01400000 | -2.75640000 | -2.85750000 |

### IS3

|    |             |             |             |
|----|-------------|-------------|-------------|
| Zr | 0.00004600  | 2.23403500  | -0.40995700 |
| Zr | 0.00000700  | 0.24705100  | 1.75741300  |
| O  | -1.56774400 | 1.52134500  | -1.33016500 |
| O  | 1.56780000  | 1.52126000  | -1.33015200 |
| O  | 0.00004900  | 2.21657400  | 1.57490500  |
| Zr | -1.61318800 | -0.41251300 | -0.86520900 |
| Zr | 1.61312100  | -0.41260900 | -0.86521200 |
| O  | -0.00005500 | -1.20208200 | -1.67838400 |
| C  | 2.99703700  | -2.45533400 | -0.07369000 |
| C  | 2.10462500  | -2.15875800 | 0.93003100  |
| C  | 1.91436000  | -0.81004300 | 1.44629600  |
| C  | 3.08223400  | 0.03028800  | 1.14286100  |
| C  | 3.99599500  | -0.27493600 | 0.15999600  |
| C  | 3.84776800  | -1.44350100 | -0.64070500 |
| H  | 3.00586300  | -3.45134100 | -0.50395000 |
| H  | 1.42386500  | -2.94329200 | 1.25024200  |
| H  | 3.18071000  | 0.98618000  | 1.64812100  |
| H  | 4.77698800  | 0.43769300  | -0.08373800 |
| H  | 4.58667600  | -1.70309000 | -1.38525000 |
| C  | -2.99705200 | -2.45531300 | -0.07373700 |
| C  | -2.10460800 | -2.15879100 | 0.92996800  |
| C  | -1.91431700 | -0.81010100 | 1.44628900  |
| C  | -3.08220100 | 0.03025100  | 1.14293600  |
| C  | -3.99600400 | -0.27492500 | 0.16009400  |
| C  | -3.84780300 | -1.44344700 | -0.64067300 |
| H  | -3.00589700 | -3.45129800 | -0.50404700 |
| H  | -1.42384400 | -2.94334500 | 1.25012300  |
| H  | -3.18066700 | 0.98611300  | 1.64825600  |
| H  | -4.77701600 | 0.43771000  | -0.08356500 |
| H  | -4.58674200 | -1.70300300 | -1.38519900 |

### TS3

|    |             |             |             |
|----|-------------|-------------|-------------|
| Zr | -1.72810100 | -1.49521800 | -1.15969900 |
| Zr | 0.67051500  | -0.96698200 | 0.55076700  |
| O  | -1.69508100 | 0.23041400  | -1.99944300 |
| O  | -2.93598400 | -1.47749800 | 0.41585600  |
| O  | 0.02920500  | -2.26313900 | -0.81313600 |
| Zr | -0.85743500 | 1.45532700  | -0.59879500 |

|    |             |             |             |
|----|-------------|-------------|-------------|
| Zr | -2.09130300 | -0.25393000 | 1.64060600  |
| O  | -2.31251600 | 1.45181700  | 0.81406900  |
| C  | 5.16529100  | -0.07075600 | 1.02880800  |
| C  | 3.82450200  | 0.26254900  | 1.10815600  |
| C  | 2.87105800  | -0.36986200 | 0.29828900  |
| C  | 3.33516700  | -1.31677400 | -0.63598900 |
| C  | 4.67757700  | -1.65797100 | -0.70447600 |
| C  | 5.59968200  | -1.03696700 | 0.12688700  |
| H  | 5.88169300  | 0.42593400  | 1.67512300  |
| H  | 3.51219000  | 1.03437400  | 1.80671200  |
| H  | 2.63702400  | -1.79440600 | -1.32242400 |
| H  | 5.00660900  | -2.40436700 | -1.41999900 |
| H  | 6.65090000  | -1.29317800 | 0.06504800  |
| C  | 0.57149600  | 2.92917100  | 0.88872700  |
| C  | 0.97132200  | 1.56206700  | 0.91024500  |
| C  | 1.41519900  | 0.91109000  | -0.32574900 |
| C  | 1.44682800  | 1.68463400  | -1.49505200 |
| C  | 0.93107400  | 3.00278200  | -1.52743300 |
| C  | 0.49073700  | 3.60985300  | -0.31993800 |
| H  | 0.18010900  | 3.38890900  | 1.78944000  |
| H  | 1.23001900  | 1.10901200  | 1.87130000  |
| H  | 1.66231500  | 1.19114600  | -2.43937800 |
| H  | 0.91806700  | 3.56718400  | -2.45040700 |
| H  | 0.08940000  | 4.61585700  | -0.34421000 |

### FS3

|    |             |             |             |
|----|-------------|-------------|-------------|
| Zr | 1.42576000  | -1.44865500 | 1.34208100  |
| Zr | -0.69814200 | -0.85416200 | -0.72814500 |
| O  | 1.22001600  | 0.33262400  | 2.04803200  |
| O  | 2.94939000  | -1.64999300 | 0.08508800  |
| O  | -0.32592200 | -2.09269900 | 0.72144500  |
| Zr | 0.64683200  | 1.44508800  | 0.44913900  |
| Zr | 2.27271200  | -0.50731000 | -1.34277300 |
| O  | 2.29685800  | 1.28016700  | -0.73100800 |
| C  | -4.03107200 | -1.42688600 | -1.35623500 |
| C  | -3.14130400 | -0.34203300 | -1.29525200 |
| C  | -2.80401800 | 0.26773700  | -0.04758200 |
| C  | -3.44578600 | -0.26798700 | 1.10299300  |
| C  | -4.31280300 | -1.32396000 | 1.01468600  |
| C  | -4.60697300 | -1.93480800 | -0.21777900 |
| H  | -4.27369700 | -1.84692200 | -2.32656100 |
| H  | -2.86566400 | 0.13947300  | -2.23171200 |
| H  | -3.23665100 | 0.15656400  | 2.07653000  |
| H  | -4.77810700 | -1.69742400 | 1.92012500  |

|   |             |             |             |
|---|-------------|-------------|-------------|
| H | -5.28478700 | -2.77744300 | -0.26620600 |
| C | -0.44213800 | 3.03724200  | -1.18722700 |
| C | -1.14755900 | 1.82430000  | -1.20386000 |
| C | -1.79873100 | 1.31605100  | 0.02553500  |
| C | -1.65708900 | 2.18788600  | 1.17988800  |
| C | -0.87744800 | 3.32791900  | 1.17659100  |
| C | -0.17868700 | 3.73822300  | -0.00307500 |
| H | 0.03533400  | 3.35641800  | -2.10631900 |
| H | -1.40803000 | 1.42082500  | -2.17436300 |
| H | -2.13773400 | 1.89854800  | 2.10545900  |
| H | -0.79489200 | 3.91607700  | 2.08177600  |
| H | 0.39665100  | 4.65250500  | -0.01131800 |

(8) The optimized structures involved in Suzuki-Miyaura cross-coupling mechanism catalyzed by (ZrO)<sub>12</sub> cluster

**IS1**

|    |             |             |             |
|----|-------------|-------------|-------------|
| Zr | 0.19561300  | -2.80509900 | 0.30258700  |
| Zr | 1.37031100  | -0.50705500 | 2.10063800  |
| Zr | 2.22333400  | -0.54796400 | -0.91599500 |
| Zr | 1.50520700  | 2.13158500  | 0.42407900  |
| Zr | 0.18794100  | 1.35743000  | -2.41575400 |
| Zr | -1.57247500 | 2.77834700  | -0.41262900 |
| Zr | -0.42689000 | -1.73647000 | -2.44813300 |
| Zr | -2.64972900 | 0.47743200  | -2.09805000 |
| Zr | -2.64895400 | -2.15782700 | -0.39537600 |
| Zr | -3.38456900 | 0.62427600  | 0.93902800  |
| Zr | -1.60586600 | -1.37382100 | 2.45365600  |
| Zr | -0.91057200 | 1.58571400  | 2.41295300  |
| O  | 0.19474200  | -2.21091700 | 2.45231900  |
| O  | -2.53439200 | 0.53630400  | 2.90562400  |
| O  | -3.44155800 | -1.44772400 | 1.32816900  |
| O  | -1.05758100 | -3.37653400 | -1.15278700 |
| O  | -2.56594900 | -1.51168000 | -2.39936300 |
| O  | -3.47670200 | 1.82336600  | -0.66955400 |
| O  | 1.16406200  | -0.56115500 | -2.76122900 |
| O  | -0.22419100 | 3.14362700  | 1.03925700  |
| O  | 2.02018700  | 1.48779000  | -1.41551700 |
| O  | 1.22566700  | 1.47696700  | 2.43817700  |
| O  | 2.04164100  | -1.82123200 | 0.66680800  |
| O  | -1.57558200 | 2.30537600  | -2.52174300 |
| C  | 3.62887300  | 0.59740400  | 0.87123400  |
| C  | 3.88131600  | 1.99953900  | 1.15577700  |
| C  | 4.36663500  | 2.85246900  | 0.18342600  |
| C  | 4.93551900  | 2.30925500  | -1.01653100 |

|    |            |             |             |
|----|------------|-------------|-------------|
| C  | 5.02930800 | 0.95592800  | -1.18372200 |
| C  | 4.37112200 | -0.00303400 | -0.32390700 |
| H  | 3.70761500 | -0.03480400 | 1.78030900  |
| H  | 3.71376500 | 2.37259200  | 2.17301000  |
| H  | 4.49965700 | 3.91422900  | 0.41101200  |
| H  | 5.36427700 | 2.98319100  | -1.76092600 |
| H  | 5.61076200 | 0.55719700  | -2.02095100 |
| Br | 5.55230100 | -1.53934700 | 0.11823900  |

### TS1

|    |             |             |             |
|----|-------------|-------------|-------------|
| Zr | 0.06339500  | -2.53734700 | 1.28258400  |
| Zr | 1.19796400  | 0.20403100  | 2.31784500  |
| Zr | 2.39856300  | -0.94602300 | -0.46875200 |
| Zr | 1.65412400  | 2.18224000  | -0.07527600 |
| Zr | 0.41834500  | 0.43619700  | -2.61367500 |
| Zr | -1.37855200 | 2.48206900  | -1.42905400 |
| Zr | -0.28061600 | -2.48413700 | -1.70477700 |
| Zr | -2.44346000 | -0.22542100 | -2.32508200 |
| Zr | -2.70743300 | -2.12173100 | 0.17426600  |
| Zr | -3.39944600 | 0.96361000  | 0.43649300  |
| Zr | -1.86021200 | -0.42515300 | 2.64599900  |
| Zr | -1.01113700 | 2.29825000  | 1.68665800  |
| O  | -0.09261100 | -1.23860800 | 3.07868400  |
| O  | -2.72417700 | 1.55255000  | 2.40244600  |
| O  | -3.60447500 | -0.86797600 | 1.48817500  |
| O  | -1.11747800 | -3.54120500 | 0.02127000  |
| O  | -2.41084200 | -2.19754500 | -1.89738100 |
| O  | -3.29224300 | 1.52397500  | -1.49087700 |
| O  | 1.39755900  | -1.52100400 | -2.22523800 |
| O  | -0.13221200 | 3.26917900  | -0.04636600 |
| O  | 2.12601700  | 0.84387900  | -1.51561900 |
| O  | 1.10374200  | 2.20195300  | 2.01243700  |
| O  | 1.92774000  | -1.50299900 | 1.44376500  |
| O  | -1.25756600 | 1.32079000  | -3.25946600 |
| C  | 3.79036200  | 0.89959700  | 0.99821300  |
| C  | 3.88653700  | 2.30833900  | 1.07061800  |
| C  | 4.12465500  | 3.05702600  | -0.09585600 |
| C  | 4.81187700  | 2.36452400  | -1.17299900 |
| C  | 4.99110900  | 1.01159300  | -1.17084400 |
| C  | 4.28413400  | 0.19335100  | -0.21981600 |
| H  | 3.77751700  | 0.33150100  | 1.93996500  |
| H  | 3.66832800  | 2.81383900  | 2.01499000  |
| H  | 4.19437200  | 4.14635200  | -0.03542600 |
| H  | 5.18095800  | 2.95168000  | -2.01851600 |



|    |            |             |             |
|----|------------|-------------|-------------|
| H  | 5.51989400 | 0.52401700  | -1.99405400 |
| Br | 5.16794000 | -1.75946300 | 0.18438400  |

**FS1**

|    |             |             |             |
|----|-------------|-------------|-------------|
| Zr | 0.17726400  | 2.28620400  | -1.59508200 |
| Zr | 1.35790700  | -0.56440300 | -2.26888700 |
| Zr | 2.55465700  | 0.82671300  | 0.26820200  |
| Zr | 1.80053400  | -2.19965900 | 0.22863100  |
| Zr | 0.69571300  | -0.31885100 | 2.64657900  |
| Zr | -1.11980300 | -2.48102400 | 1.71937100  |
| Zr | -0.12933800 | 2.53503900  | 1.40792400  |
| Zr | -2.22431000 | 0.25521100  | 2.37816200  |
| Zr | -2.64673600 | 1.83306800  | -0.36109100 |
| Zr | -3.24663000 | -1.15766900 | -0.24572200 |
| Zr | -1.78642300 | 0.01614000  | -2.65189600 |
| Zr | -0.79904000 | -2.64114000 | -1.44130700 |
| O  | -0.04174200 | 0.81896300  | -3.14784800 |
| O  | -2.57315800 | -1.94133300 | -2.09101100 |
| O  | -3.58615400 | 0.50576200  | -1.53278200 |
| O  | -1.10493300 | 3.27218100  | -0.36354000 |
| O  | -2.16159800 | 2.15163100  | 1.70822200  |
| O  | -3.05308500 | -1.59295900 | 1.71410500  |
| O  | 1.54084400  | 1.54805000  | 1.99278100  |
| O  | 0.03555300  | -3.42416500 | 0.34877400  |
| O  | 2.41696500  | -0.81917600 | 1.55497000  |
| O  | 1.25176900  | -2.53563900 | -1.84183700 |
| O  | 1.99974000  | 1.29251300  | -1.63894200 |
| O  | -0.97646100 | -1.15455800 | 3.41122100  |
| C  | 3.69461300  | -1.06921200 | -1.02491200 |
| C  | 4.01390200  | -2.46150600 | -0.66291100 |
| C  | 5.15105200  | -2.73688200 | 0.14770500  |
| C  | 5.89697900  | -1.73136300 | 0.71326400  |
| C  | 5.49637400  | -0.37749900 | 0.50164000  |
| C  | 4.47599000  | -0.00087200 | -0.34273500 |
| H  | 3.57020700  | -0.89523200 | -2.15028200 |
| H  | 3.68322400  | -3.25421800 | -1.34879100 |
| H  | 5.43166200  | -3.78351400 | 0.30779600  |
| H  | 6.76071100  | -1.96198300 | 1.34105700  |
| H  | 6.02187500  | 0.39984000  | 1.07199500  |
| Br | 1.90929000  | 3.97725100  | 0.01364500  |

**IM**

|    |             |            |             |
|----|-------------|------------|-------------|
| Zr | -0.51435200 | 2.53883500 | -1.49468000 |
| Zr | 1.47639600  | 0.11110000 | -2.18354500 |

|    |             |             |             |
|----|-------------|-------------|-------------|
| Zr | 2.43225900  | 1.56945100  | 0.32992100  |
| Zr | 2.43085600  | -1.46771100 | 0.21641100  |
| Zr | 0.75465900  | 0.07377500  | 2.56975900  |
| Zr | -0.34388400 | -2.50985400 | 1.67721100  |
| Zr | -0.85396800 | 2.61671400  | 1.39153000  |
| Zr | -2.18241900 | -0.20587500 | 2.37662000  |
| Zr | -3.08630000 | 1.21075600  | -0.33181700 |
| Zr | -2.74096200 | -1.83602200 | -0.28614500 |
| Zr | -1.68548400 | -0.27598500 | -2.62666000 |
| Zr | -0.00893400 | -2.53030600 | -1.46991900 |
| O  | -0.25545400 | 1.07160100  | -3.02482300 |
| O  | -1.87789700 | -2.38344300 | -2.17626700 |
| O  | -3.55343000 | -0.31394900 | -1.56574700 |
| O  | -2.14771700 | 3.04581100  | -0.38068000 |
| O  | -2.67695300 | 1.62679700  | 1.71907900  |
| O  | -2.43280400 | -2.20360200 | 1.67798800  |
| O  | 1.09009600  | 2.13548500  | 1.83044300  |
| O  | 1.05377100  | -3.08312000 | 0.31836800  |
| O  | 2.66784600  | -0.01453200 | 1.62012800  |
| O  | 1.94069200  | -1.82767900 | -1.82943000 |
| O  | 1.54409300  | 2.06075600  | -1.42457300 |
| O  | -0.54898300 | -1.21024600 | 3.38846100  |
| C  | 3.95347500  | 0.13323900  | -1.05065800 |
| C  | 4.62235200  | -1.14605100 | -0.75079900 |
| C  | 5.81996200  | -1.15563600 | 0.01259200  |
| C  | 6.32582900  | -0.01239500 | 0.58686600  |
| C  | 5.60116300  | 1.20625400  | 0.43309600  |
| C  | 4.48340000  | 1.34429400  | -0.36077100 |
| H  | 3.73288200  | 0.28758500  | -2.16824500 |
| H  | 4.45981100  | -1.98400100 | -1.44266000 |
| H  | 6.34734700  | -2.10798500 | 0.13415800  |
| H  | 7.23959600  | -0.04339100 | 1.18429900  |
| H  | 5.94532400  | 2.07348900  | 1.01230200  |
| O  | 0.10856500  | 4.02795300  | 0.00119900  |
| H  | 1.02867400  | 4.30633300  | 0.07757800  |

## IS2

|    |             |             |             |
|----|-------------|-------------|-------------|
| Zr | 2.44137300  | 0.61948600  | 0.32008000  |
| Zr | -0.20152400 | 1.61079800  | 1.90105000  |
| Zr | -0.33469800 | 2.59845400  | -0.99264800 |
| Zr | -2.82422700 | 1.51461100  | 0.38020400  |
| Zr | -1.79313300 | 0.15115100  | -2.40093400 |
| Zr | -3.13050700 | -1.65292300 | -0.48935200 |
| Zr | 1.45210700  | -0.17490400 | -2.40481000 |

|    |             |             |             |
|----|-------------|-------------|-------------|
| Zr | -0.74997800 | -2.59644800 | -2.10786900 |
| Zr | 1.82125600  | -2.35132500 | -0.25951400 |
| Zr | -0.82523200 | -3.24614300 | 0.98105300  |
| Zr | 0.95946100  | -1.30606100 | 2.48092400  |
| Zr | -2.05482700 | -0.80531500 | 2.35554000  |
| O  | 1.62454800  | 0.57003100  | 2.30807200  |
| O  | -0.87705300 | -2.32594500 | 2.92487100  |
| O  | 1.26655900  | -3.18895200 | 1.49023300  |
| O  | 3.07571400  | -0.89465400 | -1.04215900 |
| O  | 1.22370900  | -2.25443400 | -2.31213800 |
| O  | -2.02286600 | -3.45487400 | -0.62533000 |
| O  | 0.07091900  | 1.32843100  | -2.59873200 |
| O  | -3.64740900 | -0.34717800 | 0.97910100  |
| O  | -2.24751000 | 2.03097800  | -1.49587500 |
| O  | -2.13906200 | 1.29744200  | 2.39318200  |
| O  | 1.10866600  | 2.23992500  | 0.39645200  |
| O  | -2.64214300 | -1.66057100 | -2.59120100 |
| C  | -1.60371300 | 3.71725400  | 0.85019700  |
| C  | -3.05149600 | 3.81917800  | 1.10300400  |
| C  | -3.83521100 | 4.74813600  | 0.37302700  |
| C  | -3.30241700 | 5.51071000  | -0.64288100 |
| C  | -1.92952400 | 5.33455200  | -0.97881800 |
| C  | -1.06044500 | 4.51952000  | -0.28323900 |
| H  | -0.96743000 | 3.75276600  | 1.80477000  |
| H  | -3.42922700 | 3.49330400  | 2.08177200  |
| H  | -4.89187600 | 4.85627800  | 0.64085900  |
| H  | -3.92683900 | 6.20900100  | -1.20438400 |
| H  | -1.55720000 | 5.86177900  | -1.86754800 |
| O  | 2.71472000  | 1.46563200  | -1.74300200 |
| H  | 2.52572100  | 2.39597000  | -1.91158800 |
| C  | 5.21364400  | 0.03379000  | 1.02125000  |
| C  | 4.92949900  | 0.14811100  | 2.38625100  |
| C  | 4.58655800  | 1.39070800  | 2.92462100  |
| C  | 4.51042400  | 2.50753600  | 2.09175500  |
| C  | 4.80932700  | 2.39097100  | 0.72988300  |
| C  | 5.18000700  | 1.15396000  | 0.16515500  |
| H  | 5.48996200  | -0.93954200 | 0.60790200  |
| H  | 4.98479000  | -0.73223400 | 3.03164800  |
| H  | 4.34618100  | 1.48097600  | 3.98572800  |
| H  | 4.21524700  | 3.47614800  | 2.50196400  |
| H  | 4.77514500  | 3.27613100  | 0.08976200  |
| B  | 5.57133300  | 1.02054200  | -1.37244400 |
| O  | 5.34294000  | -0.10457400 | -2.07884600 |
| O  | 6.21702600  | 2.08916600  | -1.92081200 |

|   |            |             |             |
|---|------------|-------------|-------------|
| H | 6.38742300 | 1.93163600  | -2.85682100 |
| H | 4.55861300 | -0.59012600 | -1.70257300 |

## TS2

|    |             |             |             |
|----|-------------|-------------|-------------|
| Zr | 2.42769500  | 0.40934200  | 0.23720400  |
| Zr | -0.01513000 | 1.61553700  | 1.92116700  |
| Zr | -0.23777700 | 2.63440100  | -0.96922000 |
| Zr | -2.70664200 | 1.70161500  | 0.51092500  |
| Zr | -1.86610700 | 0.26788100  | -2.30050800 |
| Zr | -3.27855200 | -1.44433000 | -0.35603000 |
| Zr | 1.27325100  | -0.33952900 | -2.49036400 |
| Zr | -1.04370100 | -2.55881000 | -2.06626800 |
| Zr | 1.63546500  | -2.54089700 | -0.35142500 |
| Zr | -1.03541100 | -3.20892400 | 1.01970100  |
| Zr | 0.93347200  | -1.41674900 | 2.43916500  |
| Zr | -2.00602000 | -0.68815300 | 2.42494300  |
| O  | 1.73680900  | 0.40805400  | 2.23612700  |
| O  | -0.95968000 | -2.30756100 | 2.96850000  |
| O  | 1.06442200  | -3.30173100 | 1.42958400  |
| O  | 2.87844600  | -1.10291700 | -1.20915100 |
| O  | 0.93225500  | -2.38469300 | -2.36877100 |
| O  | -2.31832500 | -3.31854000 | -0.53917300 |
| O  | 0.09395600  | 1.33815400  | -2.57011100 |
| O  | -3.63148300 | -0.09337800 | 1.12520500  |
| O  | -2.19289400 | 2.17919400  | -1.40248900 |
| O  | -1.94753300 | 1.42227200  | 2.47771700  |
| O  | 1.25738900  | 2.13296200  | 0.31873500  |
| O  | -2.87415400 | -1.45752000 | -2.47171000 |
| C  | -1.32090300 | 3.80627200  | 0.95120400  |
| C  | -2.74252900 | 4.00639300  | 1.27854700  |
| C  | -3.48143000 | 5.02621100  | 0.62585700  |
| C  | -2.93875300 | 5.78325400  | -0.38851100 |
| C  | -1.60825800 | 5.50184900  | -0.81216000 |
| C  | -0.77772800 | 4.59065900  | -0.19353800 |
| H  | -0.63618900 | 3.78331600  | 1.87632200  |
| H  | -3.09510000 | 3.67883500  | 2.26613700  |
| H  | -4.50960500 | 5.21066500  | 0.95534200  |
| H  | -3.52814000 | 6.55661500  | -0.88569000 |
| H  | -1.24154400 | 6.02588400  | -1.70493300 |
| O  | 2.89166500  | 1.35935400  | -1.95803600 |
| H  | 2.68777700  | 2.30151200  | -2.05600600 |
| C  | 5.41481700  | -0.29527700 | 0.63944600  |
| C  | 6.45740100  | -0.30272000 | 1.56872100  |
| C  | 6.80292100  | 0.87453700  | 2.23071800  |

|   |            |             |             |
|---|------------|-------------|-------------|
| C | 6.10249200 | 2.05225300  | 1.95878100  |
| C | 5.06021500 | 2.04494500  | 1.03266700  |
| C | 4.68315400 | 0.87340900  | 0.34042500  |
| H | 5.17929000 | -1.22694300 | 0.11061900  |
| H | 7.01026600 | -1.22550400 | 1.76682000  |
| H | 7.62131300 | 0.87732900  | 2.95561200  |
| H | 6.37263200 | 2.97876900  | 2.47318200  |
| H | 4.53028300 | 2.98428400  | 0.83597000  |
| B | 4.37030900 | 1.22400400  | -1.90322500 |
| O | 4.90708600 | 0.07048600  | -2.37881200 |
| O | 4.95765300 | 2.45518200  | -2.04593300 |
| H | 5.91596100 | 2.38162700  | -2.08907000 |
| H | 4.34653500 | -0.66695000 | -2.04620800 |

## FS2

|    |             |             |             |
|----|-------------|-------------|-------------|
| Zr | -2.41452300 | 1.29182000  | -0.39325100 |
| Zr | 0.53977200  | 2.25791600  | -1.11423000 |
| Zr | 0.61841600  | 2.04378500  | 1.91320700  |
| Zr | 3.04254500  | 1.27103200  | 0.25620900  |
| Zr | 1.74746400  | -0.95715200 | 2.21805200  |
| Zr | 2.97832100  | -1.98920000 | -0.25213900 |
| Zr | -1.38368000 | -1.10227600 | 2.18664900  |
| Zr | 0.38593800  | -3.18452700 | 0.83140600  |
| Zr | -1.95285800 | -1.80543900 | -0.60728500 |
| Zr | 0.60139100  | -2.52965100 | -2.23294400 |
| Zr | -0.89776100 | 0.06633200  | -2.88602100 |
| Zr | 2.14771700  | 0.05572800  | -2.50310000 |
| O  | -1.34515400 | 1.86901900  | -2.09262300 |
| O  | 0.83657800  | -0.94486900 | -3.64860000 |
| O  | -1.39541100 | -1.98708200 | -2.55541300 |
| O  | -2.81282100 | -0.32832600 | 0.80584900  |
| O  | -1.62213000 | -2.95902700 | 1.18667500  |
| O  | 1.63403900  | -3.55295000 | -0.83082000 |
| O  | -0.08781500 | 0.27680000  | 2.79533600  |
| O  | 3.70845600  | -0.26585100 | -1.02365600 |
| O  | 2.41158600  | 1.06367400  | 2.18691800  |
| O  | 2.46317100  | 1.96972400  | -1.65434100 |
| O  | -0.86699000 | 2.28089900  | 0.51588600  |
| O  | 2.38594500  | -2.77256900 | 1.67335300  |
| C  | 2.06514900  | 3.62665500  | 0.68041900  |
| C  | 3.52830400  | 3.65165400  | 0.51006800  |
| C  | 4.35482300  | 4.12109000  | 1.55754000  |
| C  | 3.84160700  | 4.49729100  | 2.78232900  |
| C  | 2.44168800  | 4.37658800  | 2.99862500  |

|   |             |             |             |
|---|-------------|-------------|-------------|
| C | 1.53841400  | 3.99262300  | 2.02603500  |
| H | 1.50054200  | 4.10485000  | -0.19989200 |
| H | 3.93117600  | 3.68032600  | -0.51085700 |
| H | 5.43209900  | 4.19252800  | 1.37262900  |
| H | 4.50002200  | 4.84511500  | 3.58107900  |
| H | 2.06938600  | 4.57094400  | 4.01363400  |
| O | -3.29774800 | -1.70293300 | 3.47701600  |
| H | -3.18424700 | -2.14320900 | 4.32951600  |
| C | -5.61033700 | 1.78612800  | -0.20650400 |
| C | -6.84435500 | 2.39975200  | -0.43200100 |
| C | -6.93791200 | 3.46691200  | -1.32456600 |
| C | -5.79564000 | 3.91055200  | -1.99186900 |
| C | -4.56808800 | 3.28795600  | -1.76113900 |
| C | -4.43314400 | 2.21042000  | -0.85982200 |
| H | -5.58076600 | 0.94935100  | 0.50162700  |
| H | -7.73677900 | 2.04425100  | 0.09132200  |
| H | -7.90147000 | 3.95270600  | -1.50136700 |
| H | -5.86463500 | 4.74520300  | -2.69559100 |
| H | -3.68926100 | 3.65431100  | -2.30509200 |
| B | -4.63591600 | -1.82622600 | 3.03619500  |
| O | -5.01431500 | -1.28103900 | 1.87718300  |
| O | -5.45566900 | -2.51221000 | 3.87142600  |
| H | -6.35441500 | -2.56792300 | 3.53037600  |
| H | -4.26857900 | -0.82392900 | 1.40138300  |

### IS3'

|    |             |             |             |
|----|-------------|-------------|-------------|
| Zr | -1.19056000 | -0.05702700 | -2.15830400 |
| Zr | -0.88914700 | 2.31474700  | -0.03771800 |
| Zr | -2.36215300 | -0.65090200 | 0.79992500  |
| Zr | -0.12109700 | 1.14080900  | 2.70073200  |
| Zr | 0.29030300  | -1.94428100 | 2.23518000  |
| Zr | 2.73797100  | -0.18486200 | 2.36351200  |
| Zr | -0.45488000 | -2.64049800 | -0.85772900 |
| Zr | 2.55751900  | -2.41327000 | 0.34599700  |
| Zr | 1.65754000  | -1.16250000 | -2.41668400 |
| Zr | 3.65017500  | 0.39764600  | -0.54700800 |
| Zr | 1.35533900  | 1.93634600  | -2.08678700 |
| Zr | 1.97146400  | 2.55494000  | 0.90132100  |
| O  | -0.63559200 | 2.08936800  | -2.24475800 |
| O  | 3.04225200  | 2.42035800  | -0.77081600 |
| O  | 2.86835900  | 0.46605900  | -2.50038500 |
| O  | -0.28214800 | -1.75247500 | -2.82710800 |
| O  | 1.61258800  | -2.99021600 | -1.33592300 |
| O  | 4.05592400  | -0.95676900 | 0.88091900  |

|   |             |             |             |
|---|-------------|-------------|-------------|
| O | -1.28684400 | -2.45488000 | 1.00071300  |
| O | 1.91981800  | 1.59786000  | 2.82058100  |
| O | -1.25356500 | -0.51369400 | 2.68953700  |
| O | -0.03974800 | 2.98509600  | 1.66528800  |
| O | -2.24814200 | 0.86085200  | -0.58304200 |
| O | 2.27128000  | -2.27467000 | 2.48482900  |
| C | -5.64853600 | -0.40998700 | 0.87913300  |
| C | -6.90866400 | -0.24554700 | 1.45600400  |
| C | -7.03859700 | -0.18527800 | 2.84474100  |
| C | -5.90317600 | -0.28981400 | 3.64634600  |
| C | -4.64624700 | -0.44948400 | 3.05565500  |
| C | -4.47679500 | -0.51437800 | 1.65625000  |
| H | -5.57970700 | -0.46779800 | -0.21314500 |
| H | -7.79723200 | -0.16975700 | 0.82184900  |
| H | -8.02503600 | -0.06038500 | 3.30039100  |
| H | -5.99742100 | -0.24878700 | 4.73590500  |
| H | -3.77032100 | -0.53062800 | 3.71105600  |
| C | -2.74280700 | -3.25724900 | -1.32951900 |
| C | -2.85731600 | -3.88028300 | -2.58334200 |
| C | -3.13621700 | -3.15545600 | -3.74014600 |
| C | -3.45652200 | -1.79706400 | -3.60012700 |
| C | -3.36750000 | -1.15422500 | -2.36220400 |
| C | -2.85518400 | -1.80251300 | -1.15667600 |
| H | -2.78617300 | -3.90213000 | -0.43794100 |
| H | -2.77236300 | -4.97159900 | -2.64172700 |
| H | -3.19745800 | -3.64842200 | -4.71184000 |
| H | -3.84640900 | -1.24345800 | -4.46171300 |
| H | -3.84169800 | -0.16220500 | -2.27886200 |
| O | -2.08532800 | 4.25278600  | -0.37917600 |
| H | -2.36696700 | 4.82011900  | 0.35170600  |
| B | -2.58405700 | 4.70676100  | -1.62780700 |
| O | -2.26141500 | 4.07870700  | -2.75725300 |
| O | -3.38061100 | 5.80176200  | -1.55026200 |
| H | -3.70414500 | 6.07298900  | -2.41543100 |
| H | -1.64302200 | 3.29880600  | -2.66041800 |

### TS3'

|    |             |             |             |
|----|-------------|-------------|-------------|
| Zr | 1.52170400  | 0.50724400  | 1.73360500  |
| Zr | 0.43193500  | 2.47415400  | -0.52486700 |
| Zr | 2.05077200  | -0.27072900 | -1.23505000 |
| Zr | -0.56941000 | 0.83104600  | -2.86665800 |
| Zr | -0.33705800 | -2.20635100 | -2.06585000 |
| Zr | -3.01219100 | -0.86885800 | -1.82739600 |
| Zr | 1.04903400  | -2.38705400 | 0.80845000  |

|    |             |             |             |
|----|-------------|-------------|-------------|
| Zr | -2.09245900 | -2.80648200 | 0.31805800  |
| Zr | -1.02360700 | -1.04803500 | 2.72373600  |
| Zr | -3.47170900 | -0.13081700 | 1.16816500  |
| Zr | -1.30928700 | 1.92029400  | 2.02830600  |
| Zr | -2.52759600 | 2.08732300  | -0.86738100 |
| O  | 0.61889300  | 2.45423600  | 1.74453400  |
| O  | -3.20406300 | 1.96360000  | 1.02990300  |
| O  | -2.43403400 | 0.34326600  | 2.98934600  |
| O  | 1.08543000  | -1.28318500 | 2.57121200  |
| O  | -0.71134900 | -2.99948200 | 1.76039100  |
| O  | -3.87973900 | -1.67544100 | -0.05653200 |
| O  | 1.56419800  | -2.32284400 | -1.16254500 |
| O  | -2.70572400 | 0.94687000  | -2.63484200 |
| O  | 0.83538800  | -0.59723800 | -2.96201900 |
| O  | -0.87081100 | 2.79718300  | -2.03283200 |
| O  | 2.16097300  | 1.39564500  | -0.03441200 |
| O  | -2.22139400 | -2.87498000 | -1.83910200 |
| C  | 5.09381200  | 0.67124200  | -0.97048700 |
| C  | 6.32520500  | 0.78979900  | -1.60852300 |
| C  | 6.87891200  | -0.30218300 | -2.28111300 |
| C  | 6.18150600  | -1.51156300 | -2.31141000 |
| C  | 4.95108300  | -1.63014600 | -1.66976300 |
| C  | 4.36535200  | -0.53968000 | -0.99328100 |
| H  | 4.67617800  | 1.53933000  | -0.45144100 |
| H  | 6.86081700  | 1.74308900  | -1.57848600 |
| H  | 7.85163900  | -0.21326800 | -2.77092100 |
| H  | 6.60567700  | -2.37391900 | -2.83326700 |
| H  | 4.43274700  | -2.59374800 | -1.69460100 |
| C  | 3.56287700  | -2.46308400 | 0.95625500  |
| C  | 4.11950000  | -2.93354900 | 2.14839300  |
| C  | 4.53238300  | -2.07037600 | 3.16410800  |
| C  | 4.44400500  | -0.69847400 | 2.91968100  |
| C  | 3.89124700  | -0.19505900 | 1.74081000  |
| C  | 3.37865600  | -1.04225900 | 0.66231500  |
| H  | 3.41814700  | -3.18754100 | 0.14280000  |
| H  | 4.23596000  | -4.01486800 | 2.27780700  |
| H  | 4.94440600  | -2.45280600 | 4.09880900  |
| H  | 4.82581200  | 0.01095100  | 3.66141800  |
| H  | 4.03315500  | 0.87628000  | 1.53584500  |
| O  | 1.17153500  | 4.67204800  | -0.56120100 |
| H  | 1.12368000  | 5.21239400  | -1.36113500 |
| B  | 1.62362900  | 5.40698500  | 0.56086600  |
| O  | 1.66431300  | 4.84929700  | 1.77030800  |
| O  | 1.99428100  | 6.68541700  | 0.29005700  |



|   |            |            |            |
|---|------------|------------|------------|
| H | 2.27969600 | 7.14809300 | 1.08450700 |
| H | 1.29844200 | 3.91857900 | 1.83961900 |

**FS3'**

|    |             |             |             |
|----|-------------|-------------|-------------|
| Zr | -1.65972800 | 0.71510800  | -1.66984100 |
| Zr | -0.21080600 | 2.50768500  | 0.53339200  |
| Zr | -2.05246800 | 0.03211700  | 1.40499900  |
| Zr | 0.71637100  | 0.80690300  | 2.86318800  |
| Zr | 0.12337600  | -2.20333900 | 2.07422100  |
| Zr | 2.89399600  | -1.18330000 | 1.73206600  |
| Zr | -1.45851400 | -2.19778100 | -0.73462300 |
| Zr | 1.66216600  | -3.01145100 | -0.36264400 |
| Zr | 0.72870700  | -1.11737200 | -2.73303700 |
| Zr | 3.28373700  | -0.48247000 | -1.30183900 |
| Zr | 1.35840700  | 1.77183600  | -2.09467300 |
| Zr | 2.69436500  | 1.81098600  | 0.77683100  |
| O  | -0.48428800 | 2.53012900  | -1.70369700 |
| O  | 3.26383900  | 1.63262300  | -1.15708900 |
| O  | 2.26950700  | 0.10410100  | -3.11429600 |
| O  | -1.36530200 | -1.09788900 | -2.49603600 |
| O  | 0.21410500  | -3.01153500 | -1.74861800 |
| O  | 3.56139700  | -2.05684100 | -0.07205900 |
| O  | -1.83179600 | -2.03983200 | 1.24721900  |
| O  | 2.82964400  | 0.66249600  | 2.54690600  |
| O  | -0.83435700 | -0.46160500 | 3.02965800  |
| O  | 1.17500300  | 2.72132600  | 1.99487000  |
| O  | -2.08489100 | 1.64428900  | 0.12664800  |
| O  | 1.89686000  | -3.10218000 | 1.79814700  |
| C  | -4.62223800 | 0.82910100  | 1.06797100  |
| C  | -5.08860700 | 1.11223500  | 2.35935400  |
| C  | -5.33150300 | 0.09823400  | 3.27914200  |
| C  | -5.08131300 | -1.22221000 | 2.87936800  |
| C  | -4.61885200 | -1.51837700 | 1.60491400  |
| C  | -4.38674900 | -0.50860700 | 0.61852200  |
| H  | -4.48386400 | 1.66467200  | 0.38463600  |
| H  | -5.27113500 | 2.15569100  | 2.62992300  |
| H  | -5.69548400 | 0.32237800  | 4.28328700  |
| H  | -5.25057900 | -2.04467500 | 3.57899900  |
| H  | -4.43163500 | -2.56159200 | 1.35919100  |
| C  | -3.84554000 | -2.25339900 | -1.17318800 |
| C  | -4.04625800 | -2.54460600 | -2.54234300 |
| C  | -4.16427700 | -1.57858700 | -3.52855400 |
| C  | -4.22019600 | -0.22778800 | -3.12879600 |
| C  | -4.07835200 | 0.16751300  | -1.80278000 |

|   |             |             |             |
|---|-------------|-------------|-------------|
| C | -3.84818800 | -0.81709900 | -0.71381500 |
| H | -4.20014800 | -3.01835600 | -0.47348600 |
| H | -4.13477300 | -3.60012600 | -2.82324300 |
| H | -4.27099500 | -1.85406400 | -4.57806900 |
| H | -4.45372100 | 0.54179500  | -3.87265700 |
| H | -4.43658700 | 1.16867100  | -1.53723800 |
| O | -0.47892600 | 4.80598400  | 0.56542700  |
| H | -0.21579500 | 5.30909300  | 1.34761300  |
| B | -0.81465800 | 5.62761600  | -0.53524300 |
| O | -1.05670000 | 5.08986900  | -1.73099200 |
| O | -0.86262000 | 6.95719900  | -0.26290000 |
| H | -1.07458600 | 7.47364000  | -1.04712800 |
| H | -0.89118800 | 4.10433800  | -1.80154900 |

### IS3

|    |             |             |             |
|----|-------------|-------------|-------------|
| Zr | -1.05570600 | 1.65608300  | 1.36609800  |
| Zr | -0.27523100 | -1.08580300 | 2.73800400  |
| Zr | -2.73915300 | -0.59586300 | -0.16892300 |
| Zr | 0.19391600  | -3.12515100 | 0.14474100  |
| Zr | -0.30755700 | -1.19870600 | -2.25869100 |
| Zr | 2.48404800  | -1.94956300 | -1.61548800 |
| Zr | -1.19921500 | 1.82845600  | -1.55027000 |
| Zr | 1.76558200  | 0.83643400  | -2.58604100 |
| Zr | 1.35397300  | 2.74583600  | -0.12469500 |
| Zr | 3.57730700  | 0.58528900  | -0.02397500 |
| Zr | 1.95242300  | 1.12569000  | 2.46906800  |
| Zr | 2.38513900  | -1.66192800 | 1.49479700  |
| O  | 0.05349400  | 0.89857500  | 3.15939800  |
| O  | 3.64137200  | -0.16430500 | 1.99813800  |
| O  | 2.96626400  | 2.31143800  | 1.04398500  |
| O  | -0.66598900 | 3.15902500  | 0.04351800  |
| O  | 0.72014700  | 2.50993100  | -2.15538800 |
| O  | 3.53353500  | -0.15131700 | -1.91200200 |
| O  | -2.06774800 | -0.00218800 | -2.01304700 |
| O  | 2.23784000  | -3.22966900 | -0.04299300 |
| O  | -1.40373200 | -2.21365700 | -0.63664900 |
| O  | 0.47885100  | -2.85955700 | 2.17929300  |
| O  | -1.81001000 | -0.38307200 | 1.65558600  |
| O  | 1.39865500  | -1.17695000 | -3.32251400 |
| C  | -6.03613200 | -0.68558700 | 0.22184600  |
| C  | -7.28721100 | -1.29980900 | 0.29154300  |
| C  | -7.40582400 | -2.67338900 | 0.07275600  |
| C  | -6.26882400 | -3.42584800 | -0.21630500 |
| C  | -5.02143500 | -2.79893700 | -0.28246000 |

|   |             |             |             |
|---|-------------|-------------|-------------|
| C | -4.86315000 | -1.41339900 | -0.06494600 |
| H | -5.96842400 | 0.39409200  | 0.39237000  |
| H | -8.17796800 | -0.70532200 | 0.51559600  |
| H | -8.38560500 | -3.15627100 | 0.12623300  |
| H | -6.35429800 | -4.50243600 | -0.39136000 |
| H | -4.14746700 | -3.42206100 | -0.51630200 |
| C | -3.53503000 | 2.45076400  | -1.14449600 |
| C | -3.64671200 | 3.84095500  | -1.06012300 |
| C | -3.56531800 | 4.51420300  | 0.16737000  |
| C | -3.49637300 | 3.75094400  | 1.33139500  |
| C | -3.36340900 | 2.35255400  | 1.29409000  |
| C | -3.24883500 | 1.60965500  | 0.02658800  |
| H | -3.87091200 | 1.97723000  | -2.08010800 |
| H | -3.87527000 | 4.40983900  | -1.96854700 |
| H | -3.64810500 | 5.60121000  | 0.21436500  |
| H | -3.59959600 | 4.24590500  | 2.30378800  |
| H | -3.62529600 | 1.80814700  | 2.21681500  |

### TS3

|    |             |             |             |
|----|-------------|-------------|-------------|
| Zr | 1.44070100  | 1.31351600  | -1.58797200 |
| Zr | 0.10276700  | -1.43406200 | -2.42620100 |
| Zr | 2.14041300  | -1.17804400 | 0.10586200  |
| Zr | -0.59013500 | -3.00932500 | 0.03702100  |
| Zr | 0.07175800  | -1.20614300 | 2.52204800  |
| Zr | -2.77664600 | -1.39209600 | 1.61090200  |
| Zr | 1.41553000  | 1.49917000  | 1.49991000  |
| Zr | -1.62384400 | 1.28315900  | 2.51518800  |
| Zr | -0.89025900 | 2.87299400  | -0.11448200 |
| Zr | -3.39400300 | 1.18098500  | -0.06075400 |
| Zr | -1.59367300 | 1.21127800  | -2.56028300 |
| Zr | -2.75110400 | -1.53153300 | -1.53431600 |
| O  | 0.21725700  | 0.65387600  | -3.17051100 |
| O  | -3.45944000 | 0.30363500  | -1.97930900 |
| O  | -2.50458700 | 2.71138400  | -1.28004000 |
| O  | 1.23957500  | 2.73376900  | -0.15821400 |
| O  | -0.25777800 | 2.65411800  | 1.98754000  |
| O  | -3.54219900 | 0.57890800  | 1.85409700  |
| O  | 1.95873900  | -0.38181900 | 2.05911000  |
| O  | -2.72525400 | -2.79063300 | 0.16306600  |
| O  | 1.01243100  | -2.64257800 | 1.17950000  |
| O  | -1.18144100 | -2.92030300 | -2.05256500 |
| O  | 2.00115500  | -0.68483500 | -1.87131000 |
| O  | -1.68927400 | -0.71544900 | 3.34769500  |
| C  | 5.10937000  | -1.37971400 | -1.16237900 |

|   |            |             |             |
|---|------------|-------------|-------------|
| C | 6.29915800 | -2.10194200 | -1.12418300 |
| C | 6.89035800 | -2.42160100 | 0.10047500  |
| C | 6.27679200 | -2.01175200 | 1.28567700  |
| C | 5.08929700 | -1.28445600 | 1.24589000  |
| C | 4.46565400 | -0.96446200 | 0.02177400  |
| H | 4.66013000 | -1.14317500 | -2.13169100 |
| H | 6.77158300 | -2.41859800 | -2.05842500 |
| H | 7.82855400 | -2.98102000 | 0.13018700  |
| H | 6.73101700 | -2.25605300 | 2.25001300  |
| H | 4.62994400 | -0.96559500 | 2.18703100  |
| C | 3.91360000 | 1.59051600  | 1.15606100  |
| C | 4.53085300 | 2.84167300  | 1.07873400  |
| C | 4.81463100 | 3.45019400  | -0.14406400 |
| C | 4.52544900 | 2.73096300  | -1.30579200 |
| C | 3.90615200 | 1.48062500  | -1.26267000 |
| C | 3.53318500 | 0.80972100  | -0.01795400 |
| H | 3.87988300 | 1.10227200  | 2.14035800  |
| H | 4.80155200 | 3.34831100  | 2.01119200  |
| H | 5.27926100 | 4.43592300  | -0.19042100 |
| H | 4.79728300 | 3.14574800  | -2.28209800 |
| H | 3.88015800 | 0.89703100  | -2.19490300 |

### FS3

|    |             |             |             |
|----|-------------|-------------|-------------|
| Zr | 1.57750100  | 1.38042900  | -1.52979000 |
| Zr | 0.00071600  | -1.15451000 | -2.59066300 |
| Zr | 2.07547300  | -1.40608400 | -0.16966500 |
| Zr | -0.72796600 | -2.98456600 | -0.31082900 |
| Zr | 0.12957500  | -1.52701100 | 2.35570900  |
| Zr | -2.73714200 | -1.43412300 | 1.54079600  |
| Zr | 1.66294800  | 1.18761800  | 1.54339000  |
| Zr | -1.37198400 | 1.04067000  | 2.70022000  |
| Zr | -0.66113000 | 2.87018700  | 0.22498800  |
| Zr | -3.23776900 | 1.35495700  | 0.18149000  |
| Zr | -1.54752800 | 1.57843900  | -2.35144500 |
| Zr | -2.82689400 | -1.19758300 | -1.60459900 |
| O  | 0.21204400  | 0.97722600  | -3.09140900 |
| O  | -3.44100400 | 0.71220400  | -1.82638900 |
| O  | -2.31998000 | 2.98374700  | -0.89061000 |
| O  | 1.42438900  | 2.61642800  | 0.05543900  |
| O  | 0.05442300  | 2.37126700  | 2.24175400  |
| O  | -3.34564000 | 0.52964100  | 2.01901200  |
| O  | 2.04868300  | -0.77910700 | 1.82797100  |
| O  | -2.83215000 | -2.65322100 | -0.06878400 |
| O  | 0.93310300  | -2.87215800 | 0.79842300  |

|   |             |             |             |
|---|-------------|-------------|-------------|
| O | -1.36197200 | -2.60010000 | -2.34926100 |
| O | 1.97301000  | -0.59614000 | -2.04603300 |
| O | -1.56310600 | -1.04377900 | 3.30859900  |
| C | 4.58353200  | -1.33734100 | -1.19412200 |
| C | 5.05199200  | -2.65884200 | -1.17778400 |
| C | 5.39574000  | -3.28857600 | 0.01284600  |
| C | 5.24722100  | -2.56516400 | 1.20432000  |
| C | 4.78324100  | -1.25778800 | 1.20444000  |
| C | 4.44851600  | -0.56259800 | 0.00048800  |
| H | 4.36568000  | -0.88827800 | -2.16136500 |
| H | 5.15469900  | -3.18710600 | -2.12942200 |
| H | 5.76084600  | -4.31708100 | 0.02184900  |
| H | 5.49838200  | -3.03215300 | 2.16009600  |
| H | 4.67355800  | -0.75412400 | 2.16239300  |
| C | 4.02342200  | 1.61603800  | 1.28115200  |
| C | 4.23022100  | 3.01670000  | 1.19187800  |
| C | 4.24217800  | 3.72250800  | 0.00392200  |
| C | 4.18851100  | 2.99090100  | -1.20472900 |
| C | 4.05052200  | 1.60987900  | -1.23350800 |
| C | 3.91366600  | 0.80860300  | 0.00744200  |
| H | 4.48382900  | 1.13499200  | 2.15184800  |
| H | 4.40862100  | 3.55652300  | 2.12880600  |
| H | 4.35404900  | 4.80703000  | -0.00733600 |
| H | 4.34513700  | 3.51346900  | -2.15463400 |
| H | 4.31624800  | 1.09582300  | -2.16406200 |

(9) The optimized structures involved in Suzuki-Miyaura cross-coupling mechanism catalyzed by Pd

### IS1

|    |             |             |             |
|----|-------------|-------------|-------------|
| Pd | -0.51510300 | 1.35232700  | -0.18128700 |
| C  | 0.16944000  | -0.59094000 | 0.01748700  |
| C  | -0.60508100 | -0.33990400 | 1.18700800  |
| C  | -1.92233400 | -0.84233200 | 1.24166600  |
| C  | -2.44905700 | -1.56721800 | 0.19424400  |
| C  | -1.68923500 | -1.78636600 | -0.95935700 |
| C  | -0.40072600 | -1.30489800 | -1.06288700 |
| H  | -0.12111700 | 0.00448100  | 2.09386000  |
| H  | -2.50138800 | -0.68347700 | 2.14451500  |
| H  | -3.45342700 | -1.96745000 | 0.26348700  |
| H  | -2.11041300 | -2.34624900 | -1.78653300 |
| H  | 0.20279800  | -1.50912700 | -1.93824900 |
| Br | 2.08743500  | -0.48900700 | 0.11009100  |

### TS1

|    |             |             |             |
|----|-------------|-------------|-------------|
| Pd | 0.71411700  | -1.20485600 | -0.00007200 |
| C  | -0.52351500 | 0.36415200  | 0.00001800  |
| C  | -1.21823200 | 0.34227600  | -1.21911400 |
| C  | -2.60141700 | 0.24355400  | -1.20172200 |
| C  | -3.29607400 | 0.19681600  | -0.00002900 |
| C  | -2.60144900 | 0.24340400  | 1.20168800  |
| C  | -1.21826500 | 0.34212300  | 1.21912900  |
| H  | -0.67682100 | 0.42644300  | -2.15256100 |
| H  | -3.13974100 | 0.21285300  | -2.14261800 |
| H  | -4.37752300 | 0.13304700  | -0.00004800 |
| H  | -3.13979800 | 0.21258700  | 2.14256600  |
| H  | -0.67687900 | 0.42617100  | 2.15260200  |
| Br | 1.36900200  | 1.24623800  | 0.00010100  |

### FS1

|    |             |             |             |
|----|-------------|-------------|-------------|
| Pd | 0.65975900  | 0.95612700  | -0.19377000 |
| C  | -1.03828400 | 0.11425000  | -0.02394200 |
| C  | -1.72925100 | 0.30373600  | 1.16395300  |
| C  | -3.07843700 | -0.02936600 | 1.20579900  |
| C  | -3.69888400 | -0.57696600 | 0.09228700  |
| C  | -2.97514100 | -0.80284300 | -1.07007800 |
| C  | -1.62600100 | -0.47474600 | -1.13310600 |
| H  | -1.23396400 | 0.69857400  | 2.04357500  |
| H  | -3.63727300 | 0.12670600  | 2.12185800  |
| H  | -4.74751500 | -0.84731000 | 0.13686900  |
| H  | -3.45471400 | -1.25017800 | -1.93365700 |
| H  | -1.05023400 | -0.67652100 | -2.02815700 |
| Br | 1.96145100  | -0.94964300 | 0.20467000  |

### IM

|    |             |             |             |
|----|-------------|-------------|-------------|
| Pd | 1.35034200  | -0.32183100 | 0.13805900  |
| C  | -0.52610600 | -0.00670600 | -0.02959800 |
| C  | -1.26964500 | -1.15881500 | -0.25365000 |
| C  | -2.65853900 | -1.08677800 | -0.22769700 |
| C  | -3.28574700 | 0.12988600  | -0.00703500 |
| C  | -2.52870000 | 1.27693000  | 0.19100400  |
| C  | -1.14066900 | 1.21866400  | 0.17877100  |
| H  | -0.78738800 | -2.11231900 | -0.45602700 |
| H  | -3.24460800 | -1.98334900 | -0.39600200 |
| H  | -4.36784600 | 0.18597100  | 0.00374800  |
| H  | -3.02075800 | 2.22831500  | 0.36188700  |
| H  | -0.54206400 | 2.10799200  | 0.33265600  |
| O  | 2.05916200  | 1.33945500  | -0.48624000 |
| H  | 1.83007300  | 1.42290300  | -1.41780600 |

**IS2**

|    |             |             |             |
|----|-------------|-------------|-------------|
| Pd | 0.17311100  | -0.19906300 | -0.15935600 |
| C  | 2.08295400  | 0.00838500  | -0.00938500 |
| C  | 2.78449300  | 1.06350800  | 0.54665500  |
| C  | 4.16420300  | 0.95252900  | 0.67818700  |
| C  | 4.82335100  | -0.19289300 | 0.25312900  |
| C  | 4.10913100  | -1.24006400 | -0.31027200 |
| C  | 2.72911900  | -1.13568900 | -0.45172100 |
| H  | 2.26492400  | 1.95143900  | 0.88799200  |
| H  | 4.72562000  | 1.76732900  | 1.12241600  |
| H  | 5.89945600  | -0.26888300 | 0.35796600  |
| H  | 4.62046800  | -2.13309200 | -0.65190900 |
| H  | 2.17518800  | -1.95387500 | -0.91394800 |
| C  | -2.55549600 | -0.44789300 | 1.28744700  |
| C  | -2.76719200 | -1.80566400 | 1.43945800  |
| C  | -2.59520800 | -2.66792100 | 0.35754300  |
| C  | -2.23509800 | -2.15567400 | -0.87532600 |
| C  | -2.03195300 | -0.77794500 | -1.02760200 |
| C  | -2.17522800 | 0.11286000  | 0.05501900  |
| H  | -2.71081000 | 0.21107000  | 2.13601700  |
| H  | -3.07012900 | -2.20346600 | 2.40196100  |
| H  | -2.75951500 | -3.73273100 | 0.47894500  |
| H  | -2.13596200 | -2.81426600 | -1.73170600 |
| H  | -1.85017100 | -0.36737600 | -2.01714600 |
| O  | -2.17349500 | 2.13801000  | -1.48081400 |
| H  | -2.56660200 | 3.01274500  | -1.45866000 |
| B  | -1.89444900 | 1.71962200  | -0.14801600 |
| O  | -0.26917300 | 1.76625800  | 0.01840600  |
| H  | 0.05072500  | 2.23489000  | -0.76170500 |
| O  | -2.44537600 | 2.60205700  | 0.82255200  |
| H  | -2.02814900 | 2.52319700  | 1.68026700  |

**TS2**

|    |             |             |             |
|----|-------------|-------------|-------------|
| Pd | -0.27202500 | -0.01596200 | -0.02542600 |
| C  | -2.23890000 | -0.17227500 | 0.00258600  |
| C  | -3.15081600 | 0.81254900  | -0.35282200 |
| C  | -4.51049800 | 0.52314100  | -0.37488300 |
| C  | -4.96171300 | -0.74488600 | -0.03574800 |
| C  | -4.05376200 | -1.72870900 | 0.32792100  |
| C  | -2.69381100 | -1.43815700 | 0.35303600  |
| H  | -2.80787100 | 1.80597700  | -0.62655400 |
| H  | -5.22013000 | 1.29224500  | -0.66144600 |
| H  | -6.02288100 | -0.96617900 | -0.05175000 |

|   |             |             |             |
|---|-------------|-------------|-------------|
| H | -4.40060800 | -2.71984200 | 0.59993700  |
| H | -1.99384900 | -2.21878400 | 0.65328300  |
| C | 2.38807200  | -0.61003600 | -1.26604600 |
| C | 3.36858700  | -1.59036000 | -1.32566900 |
| C | 3.85680900  | -2.15151500 | -0.15349000 |
| C | 3.36176400  | -1.72841400 | 1.07201100  |
| C | 2.37850200  | -0.74881100 | 1.12018200  |
| C | 1.85909500  | -0.17398100 | -0.04579700 |
| H | 2.03886300  | -0.16662900 | -2.19493500 |
| H | 3.75971100  | -1.91095500 | -2.28547100 |
| H | 4.62878600  | -2.91206500 | -0.19531300 |
| H | 3.74762200  | -2.15710000 | 1.99104200  |
| H | 2.02070100  | -0.40471500 | 2.08661300  |
| O | 1.93442400  | 2.19659900  | 1.40965300  |
| H | 2.87878900  | 2.36148200  | 1.38887300  |
| B | 1.43731700  | 1.90455900  | 0.14663700  |
| O | -0.03620000 | 2.00960700  | 0.12862200  |
| H | -0.34805000 | 2.30432600  | 0.99223300  |
| O | 2.08548800  | 2.42060200  | -0.96623500 |
| H | 1.55581200  | 2.39797200  | -1.76412100 |

## FS2

|    |             |             |             |
|----|-------------|-------------|-------------|
| Pd | 0.13963900  | -0.37583300 | 0.02386000  |
| C  | 2.15782200  | -0.48468000 | 0.02562400  |
| C  | 2.95581500  | 0.19425200  | 0.94534700  |
| C  | 4.33466400  | 0.00786000  | 0.97338600  |
| C  | 4.93593500  | -0.85671100 | 0.07137400  |
| C  | 4.15677400  | -1.53244200 | -0.85786000 |
| C  | 2.78069800  | -1.33850100 | -0.88381400 |
| H  | 2.50561700  | 0.86402700  | 1.67626900  |
| H  | 4.93772300  | 0.53581500  | 1.70499600  |
| H  | 6.01014400  | -1.00264300 | 0.08967100  |
| H  | 4.62192400  | -2.20697000 | -1.56933100 |
| H  | 2.19243200  | -1.87023600 | -1.63012300 |
| C  | -2.60518400 | -0.71735600 | 1.26855600  |
| C  | -3.91734300 | -1.17249600 | 1.31820100  |
| C  | -4.59141100 | -1.47159500 | 0.14280100  |
| C  | -3.94953500 | -1.30849400 | -1.07642200 |
| C  | -2.63702900 | -0.85274600 | -1.11436800 |
| C  | -1.91910200 | -0.56834200 | 0.05542900  |
| H  | -2.10538700 | -0.47839000 | 2.20519600  |
| H  | -4.41671600 | -1.28726200 | 2.27487000  |
| H  | -5.61807700 | -1.81930900 | 0.17620100  |
| H  | -4.47449200 | -1.53027800 | -2.00003200 |



|   |             |             |             |
|---|-------------|-------------|-------------|
| H | -2.16404600 | -0.72098800 | -2.08553200 |
| O | -0.10747000 | 4.00212300  | -0.35777600 |
| H | -0.79873700 | 4.66547200  | -0.41809700 |
| B | -0.60608800 | 2.74507500  | -0.22431700 |
| O | 0.34200500  | 1.72305700  | -0.13234500 |
| H | 1.26258300  | 1.99992500  | -0.19492600 |
| O | -1.91669100 | 2.46383300  | -0.17551200 |
| H | -2.10127500 | 1.50917400  | -0.08959900 |

### IS3

|    |             |             |             |
|----|-------------|-------------|-------------|
| Pd | 0.00005800  | -1.33749100 | 0.00000400  |
| C  | -1.45594400 | -0.05289500 | 0.06231600  |
| C  | -2.55237800 | -0.36963200 | -0.73847200 |
| C  | -3.71350700 | 0.39229200  | -0.66633900 |
| C  | -3.78068500 | 1.47936700  | 0.19102000  |
| C  | -2.68398000 | 1.80297500  | 0.97776200  |
| C  | -1.52171800 | 1.04526600  | 0.91520600  |
| H  | -2.51338700 | -1.20494400 | -1.43129300 |
| H  | -4.56153500 | 0.13689500  | -1.29272400 |
| H  | -4.68375900 | 2.07692400  | 0.24262100  |
| H  | -2.73049500 | 2.65347100  | 1.64969700  |
| H  | -0.67205500 | 1.31126600  | 1.53101200  |
| C  | 3.71377600  | 0.39201400  | 0.66567500  |
| C  | 3.78058400  | 1.47963700  | -0.19101800 |
| C  | 2.68355100  | 1.80373000  | -0.97710000 |
| C  | 1.52132000  | 1.04596900  | -0.91455200 |
| C  | 1.45591000  | -0.05272400 | -0.06232900 |
| C  | 2.55268200  | -0.36996200 | 0.73780100  |
| H  | 4.56206500  | 0.13622400  | 1.29154600  |
| H  | 4.68362800  | 2.07723800  | -0.24261200 |
| H  | 2.72978100  | 2.65464800  | -1.64851900 |
| H  | 0.67140900  | 1.31234100  | -1.52985500 |
| H  | 2.51399300  | -1.20571800 | 1.43011100  |

### TS3

|    |             |             |             |
|----|-------------|-------------|-------------|
| Pd | -0.00016500 | 1.60850700  | 0.00004300  |
| C  | 1.03250500  | -0.09703600 | 0.00003700  |
| C  | 1.62402800  | -0.49622800 | -1.20082700 |
| C  | 2.79129600  | -1.24569700 | -1.19846700 |
| C  | 3.37991100  | -1.62326800 | 0.00016300  |
| C  | 2.79063400  | -1.24649000 | 1.19873500  |
| C  | 1.62336300  | -0.49706400 | 1.20096900  |
| H  | 1.16862800  | -0.22815700 | -2.14750200 |
| H  | 3.23983900  | -1.54067600 | -2.14110600 |

|   |             |             |             |
|---|-------------|-------------|-------------|
| H | 4.28715700  | -2.21638400 | 0.00017800  |
| H | 3.23865500  | -1.54210500 | 2.14140300  |
| H | 1.16736200  | -0.22978100 | 2.14753500  |
| C | -2.79103900 | -1.24598000 | 1.19843800  |
| C | -3.37968100 | -1.62352300 | -0.00018600 |
| C | -2.79050100 | -1.24662700 | -1.19877300 |
| C | -1.62330800 | -0.49706500 | -1.20103200 |
| C | -1.03234000 | -0.09716500 | -0.00011400 |
| C | -1.62379000 | -0.49647200 | 1.20077500  |
| H | -3.23950900 | -1.54109000 | 2.14108100  |
| H | -4.28676600 | -2.21693700 | -0.00021900 |
| H | -3.23853700 | -1.54227900 | -2.14144000 |
| H | -1.16741100 | -0.22964100 | -2.14760800 |
| H | -1.16828000 | -0.22857000 | 2.14740200  |

### FS3

|    |             |             |             |
|----|-------------|-------------|-------------|
| Pd | 1.00872500  | 1.31734300  | -0.03256200 |
| C  | 0.19435500  | -0.67606700 | -0.03877900 |
| C  | 0.79739400  | -1.31425000 | -1.15516300 |
| C  | 2.08981000  | -1.79035400 | -1.10144200 |
| C  | 2.86456300  | -1.62279600 | 0.04994100  |
| C  | 2.33553000  | -0.96549900 | 1.14047200  |
| C  | 1.00787900  | -0.48805300 | 1.12398400  |
| H  | 0.19533100  | -1.49468600 | -2.03839600 |
| H  | 2.50227200  | -2.30792300 | -1.96007400 |
| H  | 3.87804300  | -2.00496200 | 0.08420700  |
| H  | 2.92508800  | -0.83843700 | 2.04158600  |
| H  | 0.55096400  | -0.17907800 | 2.05923000  |
| C  | -3.38118300 | -0.55536000 | 1.19455100  |
| C  | -4.06231200 | -0.14700400 | 0.05822000  |
| C  | -3.35177700 | 0.08953100  | -1.11086800 |
| C  | -1.97784400 | -0.07521900 | -1.13949600 |
| C  | -1.27681000 | -0.47850000 | 0.00063000  |
| C  | -2.00533200 | -0.72265800 | 1.16524600  |
| H  | -3.92492100 | -0.75561400 | 2.11114400  |
| H  | -5.13808500 | -0.01711200 | 0.08110600  |
| H  | -3.87150300 | 0.41122900  | -2.00656700 |
| H  | -1.43259200 | 0.13449200  | -2.05308000 |
| H  | -1.49157000 | -1.06833800 | 2.05490400  |

### IS3'

|    |             |             |             |
|----|-------------|-------------|-------------|
| Pd | -0.01972300 | -0.92698200 | -0.25289500 |
| C  | -1.90046000 | -0.46689800 | -0.03078200 |
| C  | -2.68475800 | -0.00455200 | -1.08868600 |

|   |             |             |             |
|---|-------------|-------------|-------------|
| C | -4.06184300 | 0.11435500  | -0.95236700 |
| C | -4.67771500 | -0.20716100 | 0.24871500  |
| C | -3.90729800 | -0.64496000 | 1.31562000  |
| C | -2.52941300 | -0.76465300 | 1.18043400  |
| H | -2.22056700 | 0.26914000  | -2.02967000 |
| H | -4.65555800 | 0.46881300  | -1.78860200 |
| H | -5.75214800 | -0.10759400 | 0.35565500  |
| H | -4.37794000 | -0.88962500 | 2.26226400  |
| H | -1.94504400 | -1.09729500 | 2.03283500  |
| C | 0.77731700  | 2.98492900  | 1.20243700  |
| C | 1.29160400  | 3.63302400  | 0.09055600  |
| C | 1.35366500  | 2.96170400  | -1.12218800 |
| C | 0.91233000  | 1.64820900  | -1.22252400 |
| C | 0.40124600  | 0.98519400  | -0.10551100 |
| C | 0.32379600  | 1.67271500  | 1.10589100  |
| H | 0.71471100  | 3.50245500  | 2.15382800  |
| H | 1.63782600  | 4.65744700  | 0.16626400  |
| H | 1.74871000  | 3.46118100  | -2.00060200 |
| H | 0.97031600  | 1.14290200  | -2.18023400 |
| H | -0.10076600 | 1.19171100  | 1.97924700  |
| O | 4.33317600  | -2.06293900 | 0.14149200  |
| H | 5.08053500  | -1.70781900 | 0.62811500  |
| B | 3.22816500  | -1.27314100 | 0.23854700  |
| O | 2.10325400  | -1.69769300 | -0.46337100 |
| H | 2.28353200  | -2.48607300 | -0.98272500 |
| O | 3.21323500  | -0.14435700 | 0.97277900  |
| H | 2.39468900  | 0.37010200  | 0.90726800  |

**TS3'**

|    |             |             |             |
|----|-------------|-------------|-------------|
| Pd | 0.24111800  | -0.96113500 | -0.11601300 |
| C  | -1.65109500 | -0.38833000 | 0.02029000  |
| C  | -2.43770200 | -0.48764000 | -1.13231400 |
| C  | -3.79989800 | -0.73375100 | -1.04546900 |
| C  | -4.41074000 | -0.86383000 | 0.19378300  |
| C  | -3.64670200 | -0.74665900 | 1.34676100  |
| C  | -2.28449400 | -0.50243500 | 1.26220800  |
| H  | -1.98390700 | -0.36949900 | -2.11010300 |
| H  | -4.38838600 | -0.81797100 | -1.95294200 |
| H  | -5.47737400 | -1.04528000 | 0.26100300  |
| H  | -4.11521300 | -0.84114500 | 2.32066800  |
| H  | -1.70959800 | -0.39558000 | 2.17537100  |
| C  | 0.39507900  | 3.03068000  | 1.14678000  |
| C  | 0.46094800  | 3.74023800  | -0.04292400 |
| C  | 0.20403100  | 3.08290800  | -1.23847300 |

|   |             |             |             |
|---|-------------|-------------|-------------|
| C | -0.11239700 | 1.73303600  | -1.24665600 |
| C | -0.17278600 | 1.00053800  | -0.05610300 |
| C | 0.07379300  | 1.67948200  | 1.14328800  |
| H | 0.58957200  | 3.53003100  | 2.09001400  |
| H | 0.70476600  | 4.79620000  | -0.03888200 |
| H | 0.24932000  | 3.62551200  | -2.17681800 |
| H | -0.31936700 | 1.24578600  | -2.19242400 |
| H | 0.00795600  | 1.15116700  | 2.08780000  |
| O | 4.66554200  | -1.48244200 | 0.02282000  |
| H | 5.37055200  | -0.86170000 | 0.22013800  |
| B | 3.43302400  | -0.90898300 | 0.09511200  |
| O | 2.34596700  | -1.72852000 | -0.18462700 |
| H | 2.60600600  | -2.62012700 | -0.42972600 |
| O | 3.25906400  | 0.38729800  | 0.42199200  |
| H | 2.33631800  | 0.68361400  | 0.41842100  |

### FS3'

|    |             |             |             |
|----|-------------|-------------|-------------|
| Pd | 0.57026500  | -0.92215000 | -0.15972000 |
| C  | -1.47815200 | -0.37072900 | 0.11514800  |
| C  | -1.33159100 | -1.15253200 | -1.07140700 |
| C  | -1.63389100 | -2.53447000 | -1.04580000 |
| C  | -2.07624300 | -3.13944400 | 0.10749000  |
| C  | -2.20847300 | -2.38661700 | 1.28209700  |
| C  | -1.90352100 | -1.04608000 | 1.29354900  |
| H  | -1.21372800 | -0.66500800 | -2.03412300 |
| H  | -1.54301800 | -3.10529400 | -1.96321300 |
| H  | -2.32298800 | -4.19480300 | 0.10864400  |
| H  | -2.56179800 | -2.86115400 | 2.19057200  |
| H  | -2.05342900 | -0.46786600 | 2.19821400  |
| C  | -1.05147500 | 3.25029200  | 1.13107200  |
| C  | -1.51727800 | 3.92058900  | 0.00763700  |
| C  | -1.97239500 | 3.18826600  | -1.07782000 |
| C  | -1.95834100 | 1.80212600  | -1.04441500 |
| C  | -1.48098100 | 1.11466800  | 0.07213100  |
| C  | -1.03527900 | 1.86664200  | 1.16373500  |
| H  | -0.69091300 | 3.81035600  | 1.98675100  |
| H  | -1.52754400 | 5.00402600  | -0.01868900 |
| H  | -2.35099000 | 3.69817400  | -1.95679100 |
| H  | -2.34094900 | 1.24448900  | -1.89150900 |
| H  | -0.64614000 | 1.35589200  | 2.03743800  |
| O  | 4.75040900  | 0.40430500  | 0.24466200  |
| H  | 5.13121900  | 1.27563800  | 0.11460700  |
| B  | 3.40793700  | 0.38615100  | 0.02715900  |
| O  | 2.74583300  | -0.82096800 | 0.18975200  |

|   |            |             |             |
|---|------------|-------------|-------------|
| H | 3.30588500 | -1.54902500 | 0.46787700  |
| O | 2.71175900 | 1.48715900  | -0.33334500 |
| H | 1.76423000 | 1.30246600  | -0.43750900 |

(10) The optimized structures involved in Suzuki-Miyaura cross-coupling mechanism catalyzed by Pd<sub>2</sub> cluster

### IS1

|    |             |             |             |
|----|-------------|-------------|-------------|
| Pd | -0.11384700 | -0.79106300 | 0.07966100  |
| Pd | -2.57341200 | -0.32109800 | -0.11177300 |
| C  | 1.44578900  | 0.65749600  | -0.01305600 |
| C  | 1.22882800  | 1.44784100  | -1.15476300 |
| C  | 0.43610200  | 2.57172000  | -1.04649700 |
| C  | -0.13681100 | 2.92978700  | 0.17592100  |
| C  | 0.07353400  | 2.15331700  | 1.29600500  |
| C  | 0.86878000  | 1.00084800  | 1.22756900  |
| H  | 1.69276400  | 1.17463100  | -2.09346900 |
| H  | 0.26142500  | 3.18082900  | -1.92570000 |
| H  | -0.74614800 | 3.82297600  | 0.24355300  |
| H  | -0.36069000 | 2.43287100  | 2.24869000  |
| H  | 1.16265100  | 0.48153900  | 2.13100600  |
| Br | 2.80304500  | -0.69998400 | -0.05822800 |

### TS1

|    |             |             |             |
|----|-------------|-------------|-------------|
| Pd | -0.28047400 | -0.68206100 | -0.00094200 |
| Pd | -2.64036200 | 0.20051900  | 0.00027600  |
| C  | 1.24180300  | 0.55147100  | 0.00011800  |
| C  | 1.42335100  | 1.20342200  | -1.22015500 |
| C  | 1.66857200  | 2.56750200  | -1.20459000 |
| C  | 1.78802900  | 3.24979900  | 0.00000300  |
| C  | 1.66685400  | 2.56794700  | 1.20466400  |
| C  | 1.42157300  | 1.20388000  | 1.22039000  |
| H  | 1.36723000  | 0.65405200  | -2.15086100 |
| H  | 1.78207500  | 3.09621300  | -2.14425900 |
| H  | 1.99865700  | 4.31266300  | -0.00003900 |
| H  | 1.77905700  | 3.09700300  | 2.14429600  |
| H  | 1.36407500  | 0.65489200  | 2.15121500  |
| Br | 2.02303700  | -1.64937200 | 0.00079100  |

### FS1

|    |             |             |             |
|----|-------------|-------------|-------------|
| Pd | 0.91257000  | -0.14546800 | -0.28533600 |
| Pd | -1.16124900 | 1.42393000  | -0.07873800 |
| C  | -1.06521300 | -0.66593600 | -0.06966300 |
| C  | -1.68583200 | -0.46648600 | 1.19571400  |
| C  | -3.01640000 | -0.86482100 | 1.40336800  |

|    |             |             |             |
|----|-------------|-------------|-------------|
| C  | -3.71934300 | -1.48536800 | 0.39404100  |
| C  | -3.11465100 | -1.71065300 | -0.84635200 |
| C  | -1.81725300 | -1.30455800 | -1.08133700 |
| H  | -1.09873400 | -0.15065600 | 2.05227700  |
| H  | -3.46963800 | -0.71799900 | 2.37763700  |
| H  | -4.73791400 | -1.81487000 | 0.56465000  |
| H  | -3.67303600 | -2.20383400 | -1.63471200 |
| H  | -1.36909200 | -1.47933800 | -2.05281200 |
| Br | 3.20856500  | -0.38444700 | 0.27045000  |

## IM

|    |             |             |             |
|----|-------------|-------------|-------------|
| Pd | 1.49357400  | -0.44522400 | 0.05983800  |
| Pd | -0.38921200 | 1.41424900  | -0.20077300 |
| C  | -0.52638400 | -0.64286600 | 0.05621500  |
| C  | -1.30417100 | -0.26559500 | 1.18790400  |
| C  | -2.68627700 | -0.50584900 | 1.22310000  |
| C  | -3.30633000 | -1.14058400 | 0.16823500  |
| C  | -2.56237700 | -1.52789000 | -0.94987700 |
| C  | -1.20788100 | -1.27262200 | -1.01449700 |
| H  | -0.81554000 | 0.08501900  | 2.09181700  |
| H  | -3.25582000 | -0.21907800 | 2.10059400  |
| H  | -4.37003700 | -1.34659700 | 0.20657900  |
| H  | -3.05623900 | -2.02345800 | -1.77890200 |
| H  | -0.65305000 | -1.56981200 | -1.89860400 |
| O  | 3.38282200  | -0.78588300 | 0.28026500  |
| H  | 3.84799700  | -1.08176000 | -0.50709900 |

## IS2

|    |             |             |             |
|----|-------------|-------------|-------------|
| Pd | -0.41890700 | -0.47231700 | -0.30541000 |
| Pd | 2.06385900  | -1.38228900 | -0.17040900 |
| C  | 1.16505400  | 0.57740400  | 0.01652000  |
| C  | 1.86171800  | 0.22916800  | 1.21986800  |
| C  | 3.14701100  | 0.77731700  | 1.46332900  |
| C  | 3.69791800  | 1.67068000  | 0.57677200  |
| C  | 2.99521800  | 2.04890000  | -0.57874100 |
| C  | 1.75185300  | 1.52747000  | -0.85262000 |
| H  | 1.32940700  | -0.23835400 | 2.04475100  |
| H  | 3.65933200  | 0.53293300  | 2.38741400  |
| H  | 4.66775300  | 2.10907900  | 0.78248400  |
| H  | 3.43965800  | 2.76273200  | -1.26389000 |
| H  | 1.20907600  | 1.84615700  | -1.73427600 |
| C  | -2.00708300 | 1.09539000  | -1.12892500 |
| C  | -1.62601900 | 2.43789100  | -1.28108100 |
| C  | -1.52436400 | 3.24859900  | -0.17351700 |

|   |             |             |             |
|---|-------------|-------------|-------------|
| C | -1.77513900 | 2.72952300  | 1.10266000  |
| C | -2.14544600 | 1.41304300  | 1.25832300  |
| C | -2.32319300 | 0.55392700  | 0.14572700  |
| H | -2.20998400 | 0.50717000  | -2.02028300 |
| H | -1.43368800 | 2.83631700  | -2.27163100 |
| H | -1.24599100 | 4.29072800  | -0.28630800 |
| H | -1.68015200 | 3.37432300  | 1.96985500  |
| H | -2.35444900 | 1.00592600  | 2.24188400  |
| O | -2.89609700 | -1.43391700 | 1.64903100  |
| H | -3.75763500 | -1.73622900 | 1.94220400  |
| B | -3.02150600 | -0.94185500 | 0.30434700  |
| O | -2.08441900 | -1.76056900 | -0.62500700 |
| H | -2.01592000 | -2.64349000 | -0.25137600 |
| O | -4.39035200 | -1.02016400 | -0.11799300 |
| H | -4.50590700 | -0.76484700 | -1.03307100 |

## TS2

|    |             |             |             |
|----|-------------|-------------|-------------|
| Pd | -0.25682300 | -0.73278200 | -0.13885700 |
| Pd | 2.38413700  | -1.01920600 | -0.38199900 |
| C  | 1.08167900  | 0.62059500  | 0.16660900  |
| C  | 2.00285300  | 0.33969200  | 1.22978100  |
| C  | 3.13774400  | 1.16952500  | 1.41244600  |
| C  | 3.33015800  | 2.26651400  | 0.60811200  |
| C  | 2.40488000  | 2.57522500  | -0.40200400 |
| C  | 1.30462500  | 1.77888600  | -0.61930000 |
| H  | 1.72382200  | -0.34150700 | 2.02995500  |
| H  | 3.81844800  | 0.96265200  | 2.23120700  |
| H  | 4.18458100  | 2.91388100  | 0.77012700  |
| H  | 2.56028900  | 3.45510500  | -1.01710300 |
| H  | 0.58415400  | 2.04108300  | -1.38558000 |
| C  | -2.32945700 | 0.92086500  | -1.25416400 |
| C  | -2.73019200 | 2.23630800  | -1.41038200 |
| C  | -2.83303800 | 3.06083700  | -0.29527300 |
| C  | -2.53247100 | 2.56726700  | 0.96729200  |
| C  | -2.12966500 | 1.24998200  | 1.11539700  |
| C  | -2.03828400 | 0.38301800  | 0.01470900  |
| H  | -2.26107300 | 0.28264300  | -2.13081000 |
| H  | -2.96453100 | 2.62419100  | -2.39602700 |
| H  | -3.14962400 | 4.09170400  | -0.41243800 |
| H  | -2.61012100 | 3.21458600  | 1.83418000  |
| H  | -1.91186100 | 0.85660900  | 2.10210700  |
| O  | -2.54559600 | -1.65504200 | 1.75063400  |
| H  | -3.40256800 | -1.63822600 | 2.18172300  |
| B  | -2.70446800 | -1.37441400 | 0.37588700  |

|   |             |             |             |
|---|-------------|-------------|-------------|
| O | -1.79088700 | -2.19316500 | -0.46301700 |
| H | -1.63697300 | -3.02567300 | -0.00557400 |
| O | -4.05466600 | -1.36027500 | -0.03007000 |
| H | -4.15243200 | -1.31794600 | -0.98157200 |

## FS2

|    |             |             |             |
|----|-------------|-------------|-------------|
| Pd | -0.28376600 | -0.45977100 | -0.15162700 |
| Pd | 2.37581100  | -1.19606700 | -0.31510800 |
| C  | 1.30878000  | 0.61782800  | 0.10286400  |
| C  | 2.12032800  | 0.29780000  | 1.23969200  |
| C  | 3.33213500  | 0.99112500  | 1.46553800  |
| C  | 3.72603100  | 1.99679300  | 0.61415100  |
| C  | 2.93447000  | 2.33024900  | -0.49383200 |
| C  | 1.76144900  | 1.65588000  | -0.75196300 |
| H  | 1.71697300  | -0.30972100 | 2.04517400  |
| H  | 3.92286500  | 0.75243900  | 2.34360100  |
| H  | 4.64294700  | 2.54289700  | 0.80580200  |
| H  | 3.25010600  | 3.12901900  | -1.15655900 |
| H  | 1.15453900  | 1.93651400  | -1.60452800 |
| C  | -2.31912400 | 1.31230700  | -1.26714000 |
| C  | -3.26490400 | 2.32959000  | -1.28319100 |
| C  | -3.44957700 | 3.13304300  | -0.16676800 |
| C  | -2.67707900 | 2.91434600  | 0.96302800  |
| C  | -1.72201000 | 1.90200500  | 0.97850700  |
| C  | -1.53534300 | 1.07689000  | -0.13347500 |
| H  | -2.19843100 | 0.69244500  | -2.14957200 |
| H  | -3.86277800 | 2.49150400  | -2.17426900 |
| H  | -4.18963700 | 3.92518600  | -0.17930000 |
| H  | -2.80845200 | 3.53861500  | 1.84078300  |
| H  | -1.11735600 | 1.76052800  | 1.86699700  |
| O  | -3.69023500 | -3.31437800 | 0.42222900  |
| H  | -4.47722400 | -3.31559300 | 0.97181400  |
| B  | -3.07841800 | -2.09667900 | 0.40134600  |
| O  | -1.93954900 | -1.98763600 | -0.38946000 |
| H  | -1.73202000 | -2.81095700 | -0.83904600 |
| O  | -3.54381300 | -1.04798400 | 1.10734300  |
| H  | -3.04564400 | -0.22806200 | 0.96678800  |

## IS3

|    |             |             |            |
|----|-------------|-------------|------------|
| Pd | -0.46452000 | -1.00409700 | 0.04045900 |
| C  | 0.68279700  | 0.55762300  | 0.06027600 |
| C  | 1.56729500  | 0.70894600  | 1.17387200 |
| C  | 2.44427000  | 1.81710400  | 1.22050600 |
| C  | 2.42624700  | 2.76183600  | 0.22154100 |



|    |             |             |             |
|----|-------------|-------------|-------------|
| C  | 1.54697100  | 2.62814300  | -0.86194500 |
| C  | 0.69790900  | 1.54787300  | -0.95224900 |
| H  | 1.42332800  | 0.12198700  | 2.07549800  |
| H  | 3.09657200  | 1.93771100  | 2.07869000  |
| H  | 3.08289900  | 3.62263500  | 0.27835100  |
| H  | 1.53541200  | 3.38391800  | -1.63978200 |
| H  | 0.01384300  | 1.46306100  | -1.78763400 |
| C  | -2.86672600 | 0.16052800  | -1.15845800 |
| C  | -4.17997700 | 0.61434700  | -1.16933900 |
| C  | -4.87523500 | 0.77069700  | 0.02096500  |
| C  | -4.25061800 | 0.47309800  | 1.22325400  |
| C  | -2.93710000 | 0.01942000  | 1.23810600  |
| C  | -2.23693800 | -0.15806000 | 0.04456000  |
| H  | -2.33715000 | 0.05334300  | -2.09963800 |
| H  | -4.65881000 | 0.85085600  | -2.11394800 |
| H  | -5.89815800 | 1.13018500  | 0.01196800  |
| H  | -4.78442400 | 0.60062600  | 2.15933100  |
| H  | -2.46167400 | -0.19447100 | 2.18894300  |
| Pd | 2.26614600  | -0.83023300 | -0.20390000 |

### TS3

|    |             |             |             |
|----|-------------|-------------|-------------|
| Pd | -0.33445600 | -1.36234100 | -0.35496600 |
| C  | 0.18679900  | 0.53282900  | -0.19889700 |
| C  | 0.88335400  | 0.87339100  | 1.00033200  |
| C  | 1.71371800  | 2.02372200  | 1.02068300  |
| C  | 1.82207800  | 2.83075200  | -0.09216000 |
| C  | 1.12350800  | 2.50882500  | -1.26083800 |
| C  | 0.34408800  | 1.37343700  | -1.32257200 |
| H  | 0.59224200  | 0.42342000  | 1.94608200  |
| H  | 2.21841800  | 2.28984200  | 1.94277200  |
| H  | 2.43842000  | 3.72178900  | -0.05679000 |
| H  | 1.19958500  | 3.15338100  | -2.12948000 |
| H  | -0.18816200 | 1.14119000  | -2.23734600 |
| C  | -2.66687900 | 0.27727400  | -1.03565300 |
| C  | -3.98276900 | 0.64381900  | -0.78950900 |
| C  | -4.45350100 | 0.72792900  | 0.51283400  |
| C  | -3.59990400 | 0.44002800  | 1.56865100  |
| C  | -2.28581600 | 0.06810600  | 1.32451900  |
| C  | -1.80577000 | -0.03442800 | 0.01817200  |
| H  | -2.31246200 | 0.23712100  | -2.05981400 |
| H  | -4.64090200 | 0.87122100  | -1.62142000 |
| H  | -5.47822300 | 1.02497600  | 0.70490100  |
| H  | -3.95698500 | 0.50887300  | 2.59073200  |
| H  | -1.63024500 | -0.14188300 | 2.16257800  |

|    |            |             |            |
|----|------------|-------------|------------|
| Pd | 2.24934500 | -0.52513700 | 0.23071400 |
|----|------------|-------------|------------|

### FS3

|    |             |             |             |
|----|-------------|-------------|-------------|
| Pd | -0.51573900 | -0.95640800 | -0.66117800 |
| C  | -0.11384200 | 1.08117500  | 0.07879600  |
| C  | 0.86984300  | 0.73204900  | 1.07661900  |
| C  | 2.19862700  | 1.24723800  | 0.97881700  |
| C  | 2.55935200  | 2.06187000  | -0.09553800 |
| C  | 1.60737600  | 2.39390500  | -1.05398000 |
| C  | 0.30920600  | 1.92497400  | -0.97235100 |
| H  | 0.52682500  | 0.34291500  | 2.02959400  |
| H  | 2.86916800  | 1.14895300  | 1.82735600  |
| H  | 3.56509700  | 2.45988300  | -0.15785400 |
| H  | 1.87834800  | 3.05379300  | -1.87065000 |
| H  | -0.41943200 | 2.26339600  | -1.69887700 |
| C  | -2.40220600 | 0.62446700  | -0.85940100 |
| C  | -3.74708400 | 0.29143400  | -0.70006200 |
| C  | -4.27991100 | 0.09093100  | 0.55888100  |
| C  | -3.45753600 | 0.22285800  | 1.67633800  |
| C  | -2.12074900 | 0.53338600  | 1.53822500  |
| C  | -1.54972600 | 0.74448900  | 0.26688100  |
| H  | -2.03781100 | 0.87778000  | -1.84858500 |
| H  | -4.37635900 | 0.20392700  | -1.57888400 |
| H  | -5.32781200 | -0.15775400 | 0.67778800  |
| H  | -3.87033700 | 0.08318900  | 2.66937400  |
| H  | -1.50640700 | 0.64331800  | 2.42365300  |
| Pd | 2.02570900  | -0.83950700 | 0.28221600  |

### IS3'

|    |             |             |             |
|----|-------------|-------------|-------------|
| Pd | 0.44473000  | 0.24929300  | -0.05778600 |
| C  | -1.01329500 | -1.01578200 | 0.09208300  |
| C  | -1.90022000 | -0.82991300 | 1.20317200  |
| C  | -3.07931600 | -1.60644300 | 1.31082700  |
| C  | -3.36735200 | -2.56394900 | 0.36789200  |
| C  | -2.49668000 | -2.77200500 | -0.71250400 |
| C  | -1.35687300 | -2.01422300 | -0.85459000 |
| H  | -1.57385300 | -0.26769300 | 2.07328000  |
| H  | -3.72671300 | -1.46944900 | 2.17036400  |
| H  | -4.25862100 | -3.17335800 | 0.46701500  |
| H  | -2.72681000 | -3.53930900 | -1.44404500 |
| H  | -0.69062300 | -2.19982800 | -1.68927100 |
| C  | 2.32534300  | -1.79623000 | -1.05696700 |
| C  | 3.46298400  | -2.59432400 | -1.01729300 |
| C  | 4.24820500  | -2.63811300 | 0.12524600  |

|    |             |             |             |
|----|-------------|-------------|-------------|
| C  | 3.88890800  | -1.87728500 | 1.22785100  |
| C  | 2.75288100  | -1.07597800 | 1.18903300  |
| C  | 1.96172100  | -1.02112700 | 0.04204400  |
| H  | 1.72387800  | -1.78172600 | -1.96005600 |
| H  | 3.73207400  | -3.18802000 | -1.88505200 |
| H  | 5.13208500  | -3.26527100 | 0.15792700  |
| H  | 4.49146400  | -1.90913700 | 2.12999100  |
| H  | 2.48568500  | -0.49680200 | 2.06664000  |
| Pd | -2.23197000 | 0.76396800  | -0.22712900 |
| O  | 1.80627400  | 2.00988100  | -0.20558500 |
| H  | 2.74190700  | 1.87976800  | -0.38299400 |
| B  | 1.39788200  | 3.31545500  | -0.01349900 |
| O  | 0.10280400  | 3.57324300  | 0.30047300  |
| H  | -0.43470800 | 2.77130800  | 0.39682700  |
| O  | 2.31835700  | 4.30528200  | -0.14965600 |
| H  | 1.95052500  | 5.17723300  | 0.01036800  |

**TS3'**

|    |             |             |             |
|----|-------------|-------------|-------------|
| Pd | 0.20670500  | -0.77384500 | -0.48163600 |
| C  | -0.83509600 | 0.87018500  | -0.20688800 |
| C  | -0.56074600 | 1.57669200  | 1.00391900  |
| C  | -0.85891100 | 2.95995100  | 1.09256400  |
| C  | -1.44504900 | 3.61933800  | 0.03190600  |
| C  | -1.74014200 | 2.92372600  | -1.14451500 |
| C  | -1.42799400 | 1.58569200  | -1.26829000 |
| H  | -0.36412400 | 1.02884700  | 1.92141600  |
| H  | -0.67093400 | 3.47938900  | 2.02562700  |
| H  | -1.69085100 | 4.67169500  | 0.11646000  |
| H  | -2.21430200 | 3.44093600  | -1.97144600 |
| H  | -1.66574100 | 1.06745300  | -2.18989100 |
| C  | -2.61993900 | -1.38412300 | -0.95077600 |
| C  | -3.77319000 | -2.08978200 | -0.63506200 |
| C  | -4.06615200 | -2.39843700 | 0.68500900  |
| C  | -3.19483000 | -1.99779700 | 1.68813700  |
| C  | -2.03878300 | -1.29786100 | 1.37405800  |
| C  | -1.72569900 | -0.99851200 | 0.04851500  |
| H  | -2.42002500 | -1.13657100 | -1.98724700 |
| H  | -4.44955400 | -2.39248700 | -1.42750600 |
| H  | -4.97233500 | -2.93971700 | 0.93198900  |
| H  | -3.41620400 | -2.22833400 | 2.72488500  |
| H  | -1.37518000 | -0.98778200 | 2.17352100  |
| Pd | 1.36594300  | 1.69777500  | 0.15037600  |
| O  | 1.92121900  | -2.18869300 | -0.72222600 |
| H  | 1.90919400  | -2.99127100 | -1.24919000 |

|   |            |             |            |
|---|------------|-------------|------------|
| B | 3.03323500 | -2.07260500 | 0.10133000 |
| O | 3.17448000 | -1.00054400 | 0.91138500 |
| H | 2.43201900 | -0.36291100 | 0.85538700 |
| O | 3.95621000 | -3.07052800 | 0.04294700 |
| H | 4.69397500 | -2.92332100 | 0.63900100 |

### FS3'

|    |             |             |             |
|----|-------------|-------------|-------------|
| Pd | 0.45858500  | 0.45650200  | -0.50425500 |
| C  | 0.34447500  | -1.63840000 | -0.00621000 |
| C  | -0.66772600 | -1.51808800 | 1.02266100  |
| C  | -1.89956700 | -2.23730600 | 0.91151000  |
| C  | -2.17110300 | -2.97823600 | -0.23425800 |
| C  | -1.21523500 | -3.05392000 | -1.25176000 |
| C  | 0.00245400  | -2.41789400 | -1.14337400 |
| H  | -0.36982400 | -1.15483900 | 1.99982000  |
| H  | -2.55144900 | -2.31534100 | 1.77553200  |
| H  | -3.10301700 | -3.52473100 | -0.31730600 |
| H  | -1.42069700 | -3.65286200 | -2.13193400 |
| H  | 0.74663300  | -2.57560600 | -1.91448600 |
| C  | 2.58001900  | -0.89939300 | -0.87589100 |
| C  | 3.88702400  | -0.45959500 | -0.67812800 |
| C  | 4.39329000  | -0.30440600 | 0.59806800  |
| C  | 3.57875500  | -0.58989800 | 1.69229200  |
| C  | 2.27878600  | -1.01459500 | 1.51504900  |
| C  | 1.73736900  | -1.18897600 | 0.22445900  |
| H  | 2.23699300  | -1.08857700 | -1.88611400 |
| H  | 4.50959400  | -0.24941100 | -1.54091000 |
| H  | 5.41373100  | 0.02792300  | 0.74780300  |
| H  | 3.96986300  | -0.48381000 | 2.69821700  |
| H  | 1.67445200  | -1.24834000 | 2.38298600  |
| Pd | -2.05076700 | -0.12307100 | 0.25700600  |
| O  | 0.24523700  | 2.63754300  | -0.85435300 |
| H  | 0.81466900  | 3.11360100  | -1.46296400 |
| B  | -0.48566800 | 3.46321500  | -0.01402600 |
| O  | -1.28014100 | 2.93528200  | 0.94192800  |
| H  | -1.25091100 | 1.95294200  | 0.96145600  |
| O  | -0.36496200 | 4.80694900  | -0.20421700 |
| H  | -0.89363200 | 5.31117100  | 0.41811400  |

(11) The optimized structures involved in Suzuki-Miyaura cross-coupling mechanism catalyzed by Pd<sub>3</sub> cluster

### IS1

|    |             |             |             |
|----|-------------|-------------|-------------|
| Pd | -0.18855800 | -0.34948500 | -0.19376900 |
| Pd | 2.27000600  | -1.24097600 | 0.08853600  |

|    |             |             |             |
|----|-------------|-------------|-------------|
| Pd | 1.86160400  | 1.16669500  | 0.05964600  |
| C  | -2.20999600 | 0.30276100  | 0.05704900  |
| C  | -2.27665900 | 1.08235900  | 1.22707600  |
| C  | -1.97250900 | 2.42374900  | 1.15591600  |
| C  | -1.60674200 | 3.01337600  | -0.05986100 |
| C  | -1.53033600 | 2.25239400  | -1.20477900 |
| C  | -1.82924700 | 0.87748200  | -1.17499100 |
| H  | -2.57777300 | 0.62311500  | 2.15963900  |
| H  | -2.02081100 | 3.02492700  | 2.05634400  |
| H  | -1.38841200 | 4.07396500  | -0.09924500 |
| H  | -1.26374800 | 2.70694200  | -2.15182500 |
| H  | -1.95040700 | 0.32616900  | -2.09928000 |
| Br | -2.96075200 | -1.45641700 | 0.06368300  |

### TS1

|    |             |             |             |
|----|-------------|-------------|-------------|
| Pd | -0.23386500 | -0.16523100 | -0.00026400 |
| Pd | 2.11360600  | 0.99176000  | 0.00090500  |
| Pd | 2.09404900  | -1.54671500 | -0.00042600 |
| C  | -2.23423300 | 0.05428000  | 0.00007500  |
| C  | -2.75099900 | -0.39426600 | -1.21786900 |
| C  | -3.75506900 | -1.35142200 | -1.20167800 |
| C  | -4.25974500 | -1.82762000 | 0.00111100  |
| C  | -3.75517400 | -1.34995700 | 1.20338300  |
| C  | -2.75109200 | -0.39282300 | 1.21851300  |
| H  | -2.37520500 | 0.00667700  | -2.15028200 |
| H  | -4.14956100 | -1.71985500 | -2.14211200 |
| H  | -5.05262600 | -2.56607500 | 0.00152600  |
| H  | -4.14975500 | -1.71725600 | 2.14422400  |
| H  | -2.37530700 | 0.00917900  | 2.15047100  |
| Br | -1.36154400 | 2.01962100  | -0.00099900 |

### FS1

|    |             |             |             |
|----|-------------|-------------|-------------|
| Pd | -0.48541500 | -0.33603800 | 0.03822200  |
| Pd | 2.06755700  | 0.83952800  | 0.18535600  |
| Pd | 1.93772700  | -1.67888900 | -0.14476200 |
| C  | -2.40409400 | -0.21889600 | 0.03354800  |
| C  | -3.09937900 | -0.13451100 | -1.16332100 |
| C  | -4.47013400 | -0.36584000 | -1.15679100 |
| C  | -5.12944600 | -0.63763200 | 0.03380000  |
| C  | -4.42459300 | -0.67342100 | 1.22847200  |
| C  | -3.05346500 | -0.44248200 | 1.23903500  |
| H  | -2.58664800 | 0.09947300  | -2.08936300 |
| H  | -5.02340200 | -0.32089200 | -2.08848200 |
| H  | -6.20026400 | -0.80553900 | 0.03285900  |

|    |             |             |             |
|----|-------------|-------------|-------------|
| H  | -4.94115000 | -0.86650000 | 2.16226800  |
| H  | -2.50689900 | -0.44301500 | 2.17654400  |
| Br | -0.14768400 | 2.03547300  | -0.14593600 |

## IM

|    |             |             |             |
|----|-------------|-------------|-------------|
| Pd | 0.49581100  | -0.12675100 | -0.06228100 |
| Pd | -1.93298600 | 1.21484000  | 0.03591500  |
| Pd | -2.01806600 | -1.35116300 | -0.05153100 |
| C  | 2.41565300  | 0.00779300  | 0.01714200  |
| C  | 3.00759000  | -1.21470300 | 0.29683000  |
| C  | 4.39377700  | -1.32540800 | 0.27031600  |
| C  | 5.16933000  | -0.21129500 | -0.01585800 |
| C  | 4.56336500  | 1.00980600  | -0.27864700 |
| C  | 3.17844400  | 1.13029000  | -0.26054000 |
| H  | 2.40287100  | -2.08846200 | 0.53870200  |
| H  | 4.86225900  | -2.27981800 | 0.48422600  |
| H  | 6.24997700  | -0.29460100 | -0.03052600 |
| H  | 5.17195300  | 1.87891700  | -0.50476900 |
| H  | 2.69972700  | 2.07961500  | -0.46987300 |
| O  | 0.10969100  | 1.80741600  | 0.27340300  |
| H  | 0.30779700  | 1.96753600  | 1.20285200  |

## IS2

|    |             |             |             |
|----|-------------|-------------|-------------|
| Pd | 0.67693500  | -0.27086400 | -0.27601800 |
| Pd | -1.40173100 | -1.57441200 | 0.91024200  |
| Pd | -1.85535400 | -0.13479900 | -1.34824100 |
| C  | -0.81557900 | 0.83932800  | 0.21055800  |
| C  | -1.45532900 | 1.84985500  | -0.58089000 |
| C  | -2.75303700 | 2.24350200  | -0.23352400 |
| C  | -3.37302400 | 1.75790800  | 0.92819100  |
| C  | -2.71885900 | 0.89728900  | 1.78165200  |
| C  | -1.41730000 | 0.42354000  | 1.46030900  |
| H  | -0.91394800 | 2.37111100  | -1.36262100 |
| H  | -3.26287500 | 2.98056900  | -0.84384600 |
| H  | -4.36386800 | 2.11674700  | 1.18299800  |
| H  | -3.15891900 | 0.63966000  | 2.73841000  |
| H  | -0.73863400 | 0.18707400  | 2.28983600  |
| C  | 2.67886900  | 1.07589500  | 1.47803100  |
| C  | 2.36902400  | 2.40559300  | 1.67783400  |
| C  | 2.06142100  | 3.23111200  | 0.59233800  |
| C  | 2.04353100  | 2.71214500  | -0.68459900 |
| C  | 2.36160900  | 1.36261700  | -0.89249700 |
| C  | 2.72733900  | 0.51369500  | 0.18089500  |
| H  | 2.94834100  | 0.43840800  | 2.31316400  |

|   |            |             |             |
|---|------------|-------------|-------------|
| H | 2.37546500 | 2.81996800  | 2.68059100  |
| H | 1.83673500 | 4.27932700  | 0.75713800  |
| H | 1.81348200 | 3.35049600  | -1.53130100 |
| H | 2.48864600 | 0.99861000  | -1.90842100 |
| O | 4.26632900 | -1.02289900 | -1.24202000 |
| H | 5.13991600 | -0.76959900 | -0.94200300 |
| B | 3.32515500 | -0.99940100 | -0.13806900 |
| O | 2.11451300 | -1.76767900 | -0.69455500 |
| H | 2.29366500 | -1.95510200 | -1.62039800 |
| O | 3.77993500 | -1.55793000 | 1.10008200  |
| H | 4.06490000 | -2.46363700 | 0.96374700  |

## TS2

|    |             |             |             |
|----|-------------|-------------|-------------|
| Pd | 0.57054400  | -0.57677600 | -0.20693500 |
| Pd | -1.90110900 | -1.41510700 | 0.74051000  |
| Pd | -1.80012800 | 0.26698400  | -1.38140800 |
| C  | -0.64573400 | 0.80419400  | 0.33262300  |
| C  | -0.96727200 | 1.99874300  | -0.39318500 |
| C  | -2.13709000 | 2.69337100  | -0.06315000 |
| C  | -2.93148200 | 2.29723200  | 1.02289200  |
| C  | -2.57500300 | 1.22841200  | 1.81657500  |
| C  | -1.42296100 | 0.45817200  | 1.50417100  |
| H  | -0.25872800 | 2.42332700  | -1.09699600 |
| H  | -2.39822800 | 3.58624900  | -0.62022100 |
| H  | -3.81217100 | 2.87937600  | 1.27036800  |
| H  | -3.13033000 | 1.01391900  | 2.72279500  |
| H  | -0.90063100 | -0.04013100 | 2.33052000  |
| C  | 2.62225500  | 0.87028500  | 1.42339100  |
| C  | 3.06755000  | 2.16642500  | 1.63584200  |
| C  | 3.34056400  | 2.98951400  | 0.55223100  |
| C  | 3.17585400  | 2.51037600  | -0.74261600 |
| C  | 2.73586300  | 1.21332400  | -0.94460800 |
| C  | 2.45480200  | 0.34955400  | 0.13062600  |
| H  | 2.44027000  | 0.22223000  | 2.27335300  |
| H  | 3.20346900  | 2.53671300  | 2.64642600  |
| H  | 3.69041400  | 4.00340500  | 0.71506800  |
| H  | 3.40131500  | 3.14876600  | -1.59048700 |
| H  | 2.64844600  | 0.84033900  | -1.96000800 |
| O  | 4.08112100  | -1.43483200 | -1.01590400 |
| H  | 4.92078100  | -1.37919200 | -0.55685400 |
| B  | 3.01800100  | -1.51535800 | -0.09614600 |
| O  | 1.86440800  | -2.19650300 | -0.70731300 |
| H  | 2.04149400  | -2.33601100 | -1.64198100 |
| O  | 3.31517200  | -1.97088100 | 1.20498800  |

|   |            |             |            |
|---|------------|-------------|------------|
| H | 2.68612400 | -2.63671600 | 1.48612900 |
|---|------------|-------------|------------|

## FS2

|    |             |             |             |
|----|-------------|-------------|-------------|
| Pd | 0.60401000  | -0.25616500 | -0.22751000 |
| Pd | -1.80518200 | -1.32005100 | 1.04546800  |
| Pd | -1.97108500 | -0.11159900 | -1.35621700 |
| C  | -0.84992900 | 0.94271100  | 0.14907400  |
| C  | -1.40870300 | 1.90243400  | -0.75761400 |
| C  | -2.63741700 | 2.50093300  | -0.45675800 |
| C  | -3.29800200 | 2.22177500  | 0.74472700  |
| C  | -2.74376300 | 1.37178200  | 1.67942000  |
| C  | -1.51533700 | 0.71415300  | 1.41368900  |
| H  | -0.82193700 | 2.26917400  | -1.59378500 |
| H  | -3.05593300 | 3.22739000  | -1.14459300 |
| H  | -4.23767900 | 2.71818200  | 0.96037100  |
| H  | -3.21270900 | 1.24904000  | 2.64948600  |
| H  | -0.89911500 | 0.41357100  | 2.27070500  |
| C  | 2.39520600  | 1.59502200  | 1.30512200  |
| C  | 3.46238900  | 2.47401200  | 1.46595500  |
| C  | 4.20385300  | 2.88244700  | 0.36847300  |
| C  | 3.87331700  | 2.40297400  | -0.89124100 |
| C  | 2.81285100  | 1.51964300  | -1.05041700 |
| C  | 2.05555600  | 1.09303600  | 0.04561100  |
| H  | 1.82378500  | 1.30024900  | 2.17914100  |
| H  | 3.70768000  | 2.84383200  | 2.45624200  |
| H  | 5.03288600  | 3.57003300  | 0.49242600  |
| H  | 4.44555600  | 2.71614100  | -1.75863400 |
| H  | 2.57867700  | 1.15628100  | -2.04581400 |
| O  | 3.67210100  | -3.55275400 | -0.32001900 |
| H  | 4.51327200  | -3.71743300 | 0.11200700  |
| B  | 3.22071600  | -2.28517800 | -0.09985400 |
| O  | 2.01852400  | -1.94223300 | -0.70726400 |
| H  | 1.65376400  | -2.66457400 | -1.22484100 |
| O  | 3.89680500  | -1.40699200 | 0.66533000  |
| H  | 3.49243800  | -0.52620100 | 0.70589700  |

## IS3

|    |             |             |             |
|----|-------------|-------------|-------------|
| Pd | -0.01077300 | 0.94673700  | 0.17008100  |
| Pd | -1.15872200 | -1.49196200 | 0.66587600  |
| Pd | 1.09354200  | -1.43140800 | -0.72043100 |
| C  | 1.88434600  | 0.25137300  | -0.06619800 |
| C  | 2.37101000  | 1.10372400  | -1.08629900 |
| C  | 3.51313400  | 1.86944400  | -0.87545000 |
| C  | 4.18746700  | 1.80624000  | 0.33402100  |



|   |             |             |             |
|---|-------------|-------------|-------------|
| C | 3.71612200  | 0.98099800  | 1.34952100  |
| C | 2.57685700  | 0.21386300  | 1.16536100  |
| H | 1.86661400  | 1.14095700  | -2.04594600 |
| H | 3.87612500  | 2.51499200  | -1.66814500 |
| H | 5.07766300  | 2.40458900  | 0.49090900  |
| H | 4.23903500  | 0.93900100  | 2.29914400  |
| H | 2.21362500  | -0.42196800 | 1.96295800  |
| C | -2.37846400 | 1.10465100  | 1.00790300  |
| C | -3.40799700 | 1.99960200  | 0.70923400  |
| C | -3.99435000 | 2.00102400  | -0.54278300 |
| C | -3.54794100 | 1.11211500  | -1.51925100 |
| C | -2.51609100 | 0.22997200  | -1.25594500 |
| C | -1.91637900 | 0.19868400  | 0.02168200  |
| H | -1.99204000 | 1.05625500  | 2.02111600  |
| H | -3.75961500 | 2.68007200  | 1.47750700  |
| H | -4.79712500 | 2.69402400  | -0.76676600 |
| H | -4.00046100 | 1.12252100  | -2.50524000 |
| H | -2.15628700 | -0.43547900 | -2.03054200 |

### TS3

|    |             |             |             |
|----|-------------|-------------|-------------|
| Pd | -0.35977700 | -0.98376400 | -0.57090400 |
| Pd | 1.75517000  | 0.97826300  | -0.01912500 |
| Pd | 2.08942500  | -1.61955700 | 0.21505200  |
| C  | -2.19446800 | -0.35762500 | 0.00640500  |
| C  | -3.16571600 | -0.28042800 | -0.99311500 |
| C  | -4.50616600 | -0.48134300 | -0.69195700 |
| C  | -4.89961600 | -0.72627600 | 0.61531700  |
| C  | -3.94341600 | -0.77540200 | 1.62065200  |
| C  | -2.60248500 | -0.58706400 | 1.32046200  |
| H  | -2.88114500 | -0.06909000 | -2.01806200 |
| H  | -5.24622400 | -0.43734300 | -1.48391800 |
| H  | -5.94775400 | -0.86966600 | 0.85191900  |
| H  | -4.24257500 | -0.96093000 | 2.64673400  |
| H  | -1.86904500 | -0.62727000 | 2.11810400  |
| C  | -0.85906800 | 1.91096100  | -1.13681700 |
| C  | -0.62418600 | 3.24191200  | -0.89405600 |
| C  | -0.04338100 | 3.65922400  | 0.31680500  |
| C  | 0.26797400  | 2.73595300  | 1.28826500  |
| C  | 0.01142300  | 1.35394400  | 1.07507000  |
| C  | -0.57313200 | 0.92019400  | -0.15948300 |
| H  | -1.30340200 | 1.60886500  | -2.07725800 |
| H  | -0.88193600 | 3.97833500  | -1.64694000 |
| H  | 0.14496000  | 4.71258700  | 0.48979300  |
| H  | 0.68196900  | 3.05344000  | 2.23843100  |

|   |            |            |            |
|---|------------|------------|------------|
| H | 0.03691900 | 0.67945300 | 1.92483600 |
|---|------------|------------|------------|

**FS3**

|    |             |             |             |
|----|-------------|-------------|-------------|
| Pd | -0.61775700 | -0.63188400 | -0.61155300 |
| Pd | 1.84408600  | 0.57568300  | 0.08063400  |
| Pd | 1.52808900  | -1.99083900 | 0.12132200  |
| C  | -2.14748300 | 0.70293500  | 0.24809700  |
| C  | -2.87406000 | 0.32837300  | -0.90728700 |
| C  | -4.07411000 | -0.37428200 | -0.78899700 |
| C  | -4.58136800 | -0.69230400 | 0.45466800  |
| C  | -3.88676400 | -0.30449000 | 1.60087000  |
| C  | -2.69002200 | 0.37105100  | 1.50515900  |
| H  | -2.55040800 | 0.65724800  | -1.88820100 |
| H  | -4.61217300 | -0.65699800 | -1.68670400 |
| H  | -5.51856900 | -1.22905600 | 0.54237100  |
| H  | -4.29123100 | -0.53520200 | 2.58004900  |
| H  | -2.16964600 | 0.66992200  | 2.40694300  |
| C  | -0.63013800 | 2.33221200  | -0.95465300 |
| C  | 0.46442800  | 3.15565800  | -0.95662300 |
| C  | 1.40994400  | 3.13916200  | 0.09243100  |
| C  | 1.21616900  | 2.30006100  | 1.18597200  |
| C  | 0.16826800  | 1.32895700  | 1.13265300  |
| C  | -0.83638100 | 1.37089200  | 0.08482400  |
| H  | -1.38248300 | 2.44344700  | -1.72522200 |
| H  | 0.59340700  | 3.86435600  | -1.76701200 |
| H  | 2.22671700  | 3.85053200  | 0.09363000  |
| H  | 1.81397600  | 2.40592800  | 2.08400900  |
| H  | -0.04374100 | 0.74432300  | 2.01891400  |

**IS3'**

|    |             |             |             |
|----|-------------|-------------|-------------|
| Pd | -0.51628500 | -0.22234700 | -0.04254200 |
| Pd | 2.39248000  | 0.09194600  | -0.78998700 |
| Pd | 1.38798800  | -2.07211900 | 0.29264500  |
| C  | -1.97662700 | 1.12970900  | -0.07860500 |
| C  | -2.66273800 | 1.35389500  | -1.27575100 |
| C  | -3.73936400 | 2.23083300  | -1.33053700 |
| C  | -4.15745100 | 2.89960400  | -0.18844400 |
| C  | -3.48783600 | 2.68756200  | 1.00666300  |
| C  | -2.40275800 | 1.81701800  | 1.06078600  |
| H  | -2.35827700 | 0.83776100  | -2.18069300 |
| H  | -4.25604500 | 2.38811300  | -2.27187800 |
| H  | -4.99936100 | 3.58136100  | -0.23077400 |
| H  | -3.80299000 | 3.20645600  | 1.90613100  |
| H  | -1.88271000 | 1.67957500  | 2.00236000  |

|   |             |             |             |
|---|-------------|-------------|-------------|
| C | 0.87798700  | 2.43888400  | -0.33365500 |
| C | 1.83048100  | 3.36685800  | 0.01686000  |
| C | 2.84010200  | 3.05739500  | 0.94658100  |
| C | 2.89156100  | 1.80709200  | 1.50793300  |
| C | 1.90816600  | 0.83781100  | 1.18057100  |
| C | 0.85246800  | 1.13968300  | 0.25298500  |
| H | 0.10615200  | 2.70574400  | -1.04492300 |
| H | 1.80266900  | 4.35529400  | -0.42960500 |
| H | 3.57287200  | 3.80889200  | 1.21805600  |
| H | 3.65633200  | 1.55766500  | 2.23535700  |
| H | 1.82858600  | -0.04442400 | 1.81481800  |
| O | -3.88825600 | -1.26118900 | 0.78889700  |
| H | -3.49776700 | -0.37559100 | 0.73726100  |
| B | -3.15914700 | -2.21650100 | 0.17898400  |
| O | -3.57888300 | -3.51119100 | 0.10548900  |
| H | -4.43804100 | -3.63668200 | 0.51472900  |
| O | -1.93491400 | -1.92398700 | -0.40912500 |
| H | -1.51559900 | -2.69285100 | -0.80550400 |

**TS3'**

|    |             |             |             |
|----|-------------|-------------|-------------|
| Pd | -0.52700100 | -0.18439300 | -0.56548600 |
| Pd | 2.33367500  | -0.57118700 | -0.36447200 |
| Pd | 0.61512600  | -2.11530000 | 0.97450800  |
| C  | -1.14496000 | 1.56555200  | 0.25278500  |
| C  | -1.89287900 | 2.41338300  | -0.57033800 |
| C  | -2.84992600 | 3.26681400  | -0.03156100 |
| C  | -3.05360100 | 3.31232300  | 1.33872200  |
| C  | -2.29745800 | 2.49292000  | 2.16705900  |
| C  | -1.35336200 | 1.62977200  | 1.63242000  |
| H  | -1.72969000 | 2.41695400  | -1.64253600 |
| H  | -3.42979900 | 3.90391800  | -0.69081300 |
| H  | -3.79173800 | 3.98471400  | 1.76018700  |
| H  | -2.44662600 | 2.52211900  | 3.24118200  |
| H  | -0.77948900 | 0.99194000  | 2.29505800  |
| C  | 1.18244900  | 2.11513500  | -1.33567000 |
| C  | 2.36809200  | 2.80846700  | -1.30033100 |
| C  | 3.27686600  | 2.62098800  | -0.24544700 |
| C  | 2.97329000  | 1.75403800  | 0.77840600  |
| C  | 1.73696100  | 1.04843300  | 0.78613400  |
| C  | 0.81181000  | 1.22505300  | -0.29429900 |
| H  | 0.50009800  | 2.27357900  | -2.16281200 |
| H  | 2.60812700  | 3.50236700  | -2.09834100 |
| H  | 4.21127800  | 3.17036300  | -0.23256300 |
| H  | 3.65129000  | 1.63179200  | 1.61549900  |

|   |             |             |             |
|---|-------------|-------------|-------------|
| H | 1.39721000  | 0.59875600  | 1.71660800  |
| O | -3.99710000 | -0.33484000 | -0.59194100 |
| H | -3.34946100 | 0.37938400  | -0.51004800 |
| B | -3.46009100 | -1.56006400 | -0.77789800 |
| O | -4.22508200 | -2.68541900 | -0.81275000 |
| H | -5.15543600 | -2.49822500 | -0.66897100 |
| O | -2.09402500 | -1.71728700 | -0.95655400 |
| H | -1.80215900 | -2.63375500 | -0.95956700 |

### FS3'

|    |             |             |             |
|----|-------------|-------------|-------------|
| Pd | -0.47769600 | 0.12940900  | -0.61962500 |
| Pd | 2.13497400  | -0.76717100 | -0.24363100 |
| Pd | 0.18651200  | -1.85233700 | 1.15659500  |
| C  | -0.55693800 | 2.08782800  | 0.45523200  |
| C  | -1.53407200 | 2.48962300  | -0.48840300 |
| C  | -2.83302500 | 2.79917100  | -0.08640000 |
| C  | -3.19505700 | 2.72361100  | 1.24586500  |
| C  | -2.24025600 | 2.34507100  | 2.18792800  |
| C  | -0.95276300 | 2.03128300  | 1.80665700  |
| H  | -1.26342200 | 2.63048200  | -1.52761100 |
| H  | -3.55584500 | 3.11547700  | -0.83103100 |
| H  | -4.20326000 | 2.97064500  | 1.55593000  |
| H  | -2.50800200 | 2.29867300  | 3.23761300  |
| H  | -0.23160100 | 1.74963700  | 2.56336900  |
| C  | 1.35215200  | 2.30274100  | -1.18578600 |
| C  | 2.68034500  | 2.16450500  | -1.51018100 |
| C  | 3.57994100  | 1.49382600  | -0.66550600 |
| C  | 3.12925600  | 0.96291400  | 0.54099700  |
| C  | 1.72770000  | 0.98686000  | 0.84003800  |
| C  | 0.80249400  | 1.72037700  | -0.00416400 |
| H  | 0.72269000  | 2.91646300  | -1.81706900 |
| H  | 3.05055200  | 2.61620100  | -2.42372600 |
| H  | 4.63395800  | 1.45614900  | -0.91309100 |
| H  | 3.83500500  | 0.63039600  | 1.29455700  |
| H  | 1.41101100  | 0.72247300  | 1.84186100  |
| O  | -3.82775400 | -0.46482800 | -0.92783400 |
| H  | -3.29201700 | 0.33237400  | -0.82066300 |
| B  | -3.09773400 | -1.59135400 | -1.10466400 |
| O  | -3.66843700 | -2.82531400 | -1.10258400 |
| H  | -4.61060000 | -2.79157100 | -0.92256800 |
| O  | -1.73068900 | -1.51578300 | -1.32442900 |
| H  | -1.25780200 | -2.34552800 | -1.18674100 |

(12) The optimized structures involved in Suzuki-Miyaura cross-coupling mechanism

catalyzed by Pd<sub>4</sub> cluster

**IS1**

|    |             |             |             |
|----|-------------|-------------|-------------|
| Pd | 2.19346500  | -0.24102100 | 1.12675900  |
| Pd | -0.42232800 | -0.56198200 | 0.54359100  |
| Pd | 0.80964000  | 1.33400600  | -0.56663200 |
| Pd | 1.60563200  | -1.16784100 | -1.11269400 |
| C  | -2.34236800 | 0.34601100  | 0.00042300  |
| C  | -1.96072100 | 0.92824400  | 1.24540300  |
| C  | -1.23441000 | 2.12669400  | 1.23427200  |
| C  | -0.84699100 | 2.73078200  | 0.03279400  |
| C  | -1.21308400 | 2.12446700  | -1.20253900 |
| C  | -1.98193400 | 0.95324600  | -1.20959900 |
| H  | -2.38367100 | 0.55567400  | 2.16985500  |
| H  | -0.98935400 | 2.60014700  | 2.17731900  |
| H  | -0.42109900 | 3.72726000  | 0.04660700  |
| H  | -1.05445700 | 2.65027300  | -2.13710600 |
| H  | -2.31673500 | 0.52453600  | -2.14498400 |
| Br | -3.65521300 | -1.02914300 | -0.00866700 |

**TS1**

|    |             |             |             |
|----|-------------|-------------|-------------|
| Pd | -2.24788700 | -0.66514000 | -0.85853800 |
| Pd | 0.44294500  | -0.28156200 | -0.36535800 |
| Pd | -1.32180100 | 1.64835700  | -0.30408800 |
| Pd | -1.35788500 | -0.12753000 | 1.51941700  |
| C  | 2.40888500  | 0.04770000  | -0.02957700 |
| C  | 2.97113500  | 0.49198100  | -1.22659200 |
| C  | 3.78957300  | 1.61464300  | -1.20162500 |
| C  | 4.08587700  | 2.24442200  | -0.00276000 |
| C  | 3.55658600  | 1.75414400  | 1.18678600  |
| C  | 2.72914500  | 0.64417000  | 1.18958700  |
| H  | 2.78103200  | -0.03568600 | -2.15304600 |
| H  | 4.21342200  | 1.98026800  | -2.13034000 |
| H  | 4.74110900  | 3.10718500  | 0.01023800  |
| H  | 3.79316100  | 2.23937500  | 2.12734900  |
| H  | 2.32617600  | 0.24889300  | 2.11286200  |
| Br | 2.03402200  | -2.13520400 | 0.02663200  |

**FS1**

|    |             |             |             |
|----|-------------|-------------|-------------|
| Pd | -0.66149300 | -1.35349500 | 1.19129600  |
| Pd | 0.13145500  | 1.01347000  | 0.30020600  |
| Pd | 0.99505300  | -1.27973100 | -0.74000500 |
| Pd | -1.79753700 | -0.35352000 | -1.00839500 |
| C  | 2.03838200  | 0.40770800  | 0.00076900  |
| C  | 2.83547700  | 0.11081900  | 1.12298200  |

|    |             |             |             |
|----|-------------|-------------|-------------|
| C  | 4.17632300  | 0.46481200  | 1.15123500  |
| C  | 4.75939300  | 1.10253500  | 0.06397700  |
| C  | 3.99637200  | 1.38863100  | -1.05919900 |
| C  | 2.65248700  | 1.04202800  | -1.09919900 |
| H  | 2.39307600  | -0.38567400 | 1.97848700  |
| H  | 4.77120500  | 0.23826400  | 2.02965200  |
| H  | 5.80867800  | 1.37354600  | 0.09153400  |
| H  | 4.44696600  | 1.88720900  | -1.91069000 |
| H  | 2.06459200  | 1.28080000  | -1.97970200 |
| Br | -2.31254600 | 1.69363700  | 0.30070400  |

## IM

|    |             |             |             |
|----|-------------|-------------|-------------|
| Pd | -0.73649400 | -0.91225300 | 1.30334600  |
| Pd | 0.42587200  | 1.25679500  | 0.11079700  |
| Pd | 0.10626300  | -1.29915600 | -1.14117800 |
| Pd | -2.19758000 | 0.44506500  | -0.39005700 |
| C  | 1.65987500  | -0.40881600 | -0.36547200 |
| C  | 2.37537700  | -0.98860500 | 0.71190800  |
| C  | 3.62460100  | -0.52408000 | 1.05994300  |
| C  | 4.20735800  | 0.54558200  | 0.37055900  |
| C  | 3.54039800  | 1.12916400  | -0.68104900 |
| C  | 2.26943600  | 0.66151700  | -1.06885300 |
| H  | 1.93804400  | -1.81826000 | 1.25690500  |
| H  | 4.15583800  | -0.98660400 | 1.88475000  |
| H  | 5.18742000  | 0.90652500  | 0.66087100  |
| H  | 3.99918100  | 1.93565400  | -1.24287300 |
| H  | 1.84828700  | 1.01658200  | -2.00535000 |
| O  | -1.38621600 | 2.20476700  | 0.41516500  |
| H  | -1.61212300 | 2.25861700  | 1.34833300  |

## IS2

|    |             |             |             |
|----|-------------|-------------|-------------|
| Pd | 0.14481900  | 2.45073400  | -0.59962200 |
| Pd | 0.12180200  | -0.95031000 | -1.15711800 |
| Pd | 1.91346100  | 0.65837700  | -0.21609500 |
| Pd | -0.51776100 | 0.61758000  | 1.09917600  |
| C  | 1.59497800  | -1.46549600 | -0.02025600 |
| C  | 2.94055200  | -1.27396000 | -0.46029800 |
| C  | 4.00959700  | -1.52804000 | 0.42530700  |
| C  | 3.76916200  | -1.98584300 | 1.69977700  |
| C  | 2.45432500  | -2.22603200 | 2.12064600  |
| C  | 1.38935500  | -1.98190600 | 1.28247500  |
| H  | 3.16056100  | -1.13294600 | -1.51564200 |
| H  | 5.02760400  | -1.40100900 | 0.07291300  |
| H  | 4.59619600  | -2.18738000 | 2.37071500  |

|   |             |             |             |
|---|-------------|-------------|-------------|
| H | 2.27251700  | -2.60941700 | 3.11895700  |
| H | 0.37742800  | -2.20703500 | 1.60315800  |
| C | -2.54369800 | 0.66680000  | 0.32723300  |
| C | -2.58249500 | 1.22765800  | 1.62897900  |
| C | -2.84785400 | 0.38655800  | 2.72993700  |
| C | -3.06711400 | -0.95847800 | 2.51986000  |
| C | -2.99950300 | -1.50693000 | 1.22668500  |
| C | -2.72656700 | -0.73119600 | 0.11399400  |
| H | -2.50443400 | 1.31522800  | -0.54173700 |
| H | -2.57302700 | 2.30419800  | 1.75971300  |
| H | -2.89560300 | 0.80501900  | 3.72851700  |
| H | -3.28232800 | -1.60440100 | 3.36450900  |
| H | -3.12472100 | -2.57834400 | 1.10449200  |
| O | -1.42014900 | -2.47383500 | -1.13325200 |
| H | -1.45125900 | -3.09751800 | -1.86557900 |
| B | -2.46704500 | -1.37953200 | -1.35331200 |
| O | -1.73799900 | -0.33968400 | -2.16480500 |
| H | -1.85490700 | -0.52042100 | -3.10116900 |
| O | -3.56983600 | -1.91254000 | -2.08803500 |
| H | -4.40006200 | -1.83216300 | -1.62126100 |

## TS2

|    |             |             |             |
|----|-------------|-------------|-------------|
| Pd | -0.00637500 | -2.31434600 | 0.39067900  |
| Pd | 0.32489400  | 0.00679900  | -1.21918400 |
| Pd | -2.07761300 | -0.75789100 | -0.17451000 |
| Pd | -0.02170500 | -0.01315500 | 1.75338200  |
| C  | -1.24911700 | 1.06870500  | -0.68157000 |
| C  | -2.33734200 | 0.94980200  | -1.60640000 |
| C  | -3.47219200 | 1.76756800  | -1.48337800 |
| C  | -3.54155500 | 2.71670700  | -0.48469000 |
| C  | -2.47933000 | 2.86607100  | 0.40923100  |
| C  | -1.35724100 | 2.06424500  | 0.32279500  |
| H  | -2.22720700 | 0.35806200  | -2.51310600 |
| H  | -4.27651100 | 1.66918000  | -2.20436000 |
| H  | -4.41342500 | 3.35544200  | -0.40123700 |
| H  | -2.53102200 | 3.62269800  | 1.18472000  |
| H  | -0.52657500 | 2.23966600  | 1.00019100  |
| C  | 1.96802300  | 0.05400700  | 1.05966000  |
| C  | 2.13472500  | 0.61620700  | 2.34886700  |
| C  | 2.18710600  | 2.00873000  | 2.47774500  |
| C  | 2.12216500  | 2.82425000  | 1.35245000  |
| C  | 1.88135600  | 2.27921700  | 0.09535900  |
| C  | 1.81079900  | 0.89706000  | -0.09080100 |
| H  | 2.17360300  | -1.00798300 | 0.91281000  |

|   |            |             |             |
|---|------------|-------------|-------------|
| H | 2.35285700 | -0.02158800 | 3.19863800  |
| H | 2.32111700 | 2.44980000  | 3.45930000  |
| H | 2.23632600 | 3.89743200  | 1.46320700  |
| H | 1.76278200 | 2.93570800  | -0.76000300 |
| O | 2.89034100 | 1.11084900  | -2.77353900 |
| H | 3.66965300 | 1.67051400  | -2.78819000 |
| B | 2.97830500 | 0.16835600  | -1.75870900 |
| O | 2.16143700 | -1.01619400 | -1.95953100 |
| H | 2.06382400 | -1.17436200 | -2.90437800 |
| O | 4.21706200 | 0.01421800  | -1.15263800 |
| H | 4.26471600 | -0.76751900 | -0.60089100 |

## FS2

|    |             |             |             |
|----|-------------|-------------|-------------|
| Pd | -1.94622200 | -0.20854100 | -1.58338700 |
| Pd | 0.44185300  | 0.08261600  | -0.28512400 |
| Pd | -1.93625900 | 1.21343900  | 0.65173800  |
| Pd | -1.61104300 | -1.52776000 | 0.69505700  |
| C  | -0.13336000 | 1.93435600  | 0.43947600  |
| C  | 0.17609300  | 2.69896200  | -0.70746400 |
| C  | 1.11849300  | 3.72010000  | -0.62854600 |
| C  | 1.74147400  | 4.01626500  | 0.57675000  |
| C  | 1.42282700  | 3.28523000  | 1.71796800  |
| C  | 0.50723800  | 2.24669700  | 1.65703400  |
| H  | -0.34061400 | 2.50557200  | -1.64093800 |
| H  | 1.35234300  | 4.29792400  | -1.51650500 |
| H  | 2.46865300  | 4.81824800  | 0.63048500  |
| H  | 1.90884500  | 3.51428700  | 2.66035100  |
| H  | 0.29785900  | 1.65428900  | 2.54083500  |
| C  | 0.74580800  | -2.56851800 | -0.65781200 |
| C  | 1.85281600  | -3.40493500 | -0.55233400 |
| C  | 2.52714400  | -3.53722200 | 0.65536300  |
| C  | 2.09725800  | -2.82107200 | 1.76947100  |
| C  | 1.01098300  | -1.96553100 | 1.68139300  |
| C  | 0.31030100  | -1.82663900 | 0.46324800  |
| H  | 0.19704500  | -2.50668600 | -1.59096200 |
| H  | 2.17837700  | -3.96930100 | -1.41986400 |
| H  | 3.38235700  | -4.19887900 | 0.73121900  |
| H  | 2.62529600  | -2.91943300 | 2.71189800  |
| H  | 0.70526100  | -1.38495100 | 2.54473700  |
| O  | 5.29795300  | 1.09699700  | -0.97489500 |
| H  | 6.09522000  | 0.62729600  | -1.22897300 |
| B  | 4.29106800  | 0.23775600  | -0.63093200 |
| O  | 3.08349700  | 0.74539000  | -0.23190900 |
| H  | 3.05276500  | 1.70733800  | -0.20842800 |



|   |            |             |             |
|---|------------|-------------|-------------|
| O | 4.49359100 | -1.10723600 | -0.68648300 |
| H | 3.73532400 | -1.63049600 | -0.40126200 |

### IS3

|    |             |             |             |
|----|-------------|-------------|-------------|
| Pd | -1.13858500 | -0.00814600 | 1.54760500  |
| Pd | 0.41011400  | -0.02354700 | -0.50641200 |
| Pd | -2.01714600 | -1.30896200 | -0.49209100 |
| Pd | -2.02039100 | 1.22805300  | -0.52644900 |
| C  | 1.85967700  | -1.34380900 | -0.26466300 |
| C  | 1.58776800  | -2.43203100 | 0.55971000  |
| C  | 2.49022100  | -3.48516300 | 0.65271100  |
| C  | 3.67031800  | -3.45807900 | -0.07555400 |
| C  | 3.94702400  | -2.37123000 | -0.89172000 |
| C  | 3.05469200  | -1.30907300 | -0.97803400 |
| H  | 0.66054300  | -2.47075600 | 1.12486300  |
| H  | 2.26552000  | -4.32896700 | 1.29668400  |
| H  | 4.37419400  | -4.27961000 | -0.00394500 |
| H  | 4.86996000  | -2.34011400 | -1.46128300 |
| H  | 3.29913700  | -0.45750400 | -1.60173700 |
| C  | 1.71471300  | 2.45605500  | -1.01185800 |
| C  | 2.51450600  | 3.57038900  | -0.78414800 |
| C  | 3.30093300  | 3.64326300  | 0.35583100  |
| C  | 3.28966800  | 2.59432100  | 1.26396500  |
| C  | 2.50208200  | 1.47275900  | 1.03638900  |
| C  | 1.70272300  | 1.40297300  | -0.10004400 |
| H  | 1.09659600  | 2.42207400  | -1.90462500 |
| H  | 2.51680300  | 4.38360400  | -1.50230200 |
| H  | 3.92199900  | 4.51364400  | 0.53466200  |
| H  | 3.90509800  | 2.64225700  | 2.15624300  |
| H  | 2.52055400  | 0.65278300  | 1.74389700  |

### TS3

|    |             |             |             |
|----|-------------|-------------|-------------|
| Pd | -1.25671900 | -0.00005100 | 1.53465900  |
| Pd | 0.33152100  | 0.00000700  | -0.49627400 |
| Pd | -2.07805900 | -1.27306600 | -0.54251800 |
| Pd | -2.07804800 | 1.27311400  | -0.54243000 |
| C  | 2.00924300  | -1.04908200 | -0.12391300 |
| C  | 2.20578000  | -1.62330100 | 1.13001100  |
| C  | 2.99375700  | -2.75600500 | 1.26917300  |
| C  | 3.60693300  | -3.32462700 | 0.16149900  |
| C  | 3.42796500  | -2.74879400 | -1.08794100 |
| C  | 2.64483600  | -1.61223400 | -1.22990800 |
| H  | 1.74096300  | -1.18698900 | 2.00733400  |
| H  | 3.13026100  | -3.19530200 | 2.25156100  |

|   |            |             |             |
|---|------------|-------------|-------------|
| H | 4.22697300 | -4.20663100 | 0.27271500  |
| H | 3.90612700 | -3.18087800 | -1.96045300 |
| H | 2.53427400 | -1.16799600 | -2.21361500 |
| C | 2.64485900 | 1.61221800  | -1.22991000 |
| C | 3.42799300 | 2.74877400  | -1.08794800 |
| C | 3.60695400 | 3.32461900  | 0.16148800  |
| C | 2.99376600 | 2.75601200  | 1.26916200  |
| C | 2.20578300 | 1.62331100  | 1.13000600  |
| C | 2.00925300 | 1.04908200  | -0.12391400 |
| H | 2.53430400 | 1.16796900  | -2.21361300 |
| H | 3.90616600 | 3.18084600  | -1.96046000 |
| H | 4.22699700 | 4.20662100  | 0.27270000  |
| H | 3.13026200 | 3.19531900  | 2.25154700  |
| H | 1.74095400 | 1.18701200  | 2.00732900  |

### FS3

|    |             |             |             |
|----|-------------|-------------|-------------|
| Pd | 1.48340200  | -1.53999000 | 0.92104600  |
| Pd | -0.30284900 | -0.26058100 | -0.63166700 |
| Pd | 1.30396800  | 1.13314200  | 0.71242500  |
| Pd | 2.31481500  | -0.49419900 | -1.18450000 |
| C  | -2.02721200 | 0.98409900  | 0.12161400  |
| C  | -1.48465300 | 1.35595400  | 1.36607700  |
| C  | -0.46153600 | 2.30621500  | 1.47232500  |
| C  | 0.04028000  | 2.94130300  | 0.30164900  |
| C  | -0.48836300 | 2.58041800  | -0.94362500 |
| C  | -1.48730300 | 1.60586800  | -1.05123900 |
| H  | -1.90735500 | 0.93438600  | 2.27006800  |
| H  | -0.18703100 | 2.67674300  | 2.45349500  |
| H  | 0.69710400  | 3.79995000  | 0.38051000  |
| H  | -0.12818600 | 3.07010800  | -1.84035600 |
| H  | -1.95894300 | 1.43859300  | -2.01280900 |
| C  | -4.24665200 | 0.39457700  | -0.87338900 |
| C  | -5.38158400 | -0.39903600 | -0.93007800 |
| C  | -5.52809700 | -1.47306900 | -0.06554500 |
| C  | -4.52814100 | -1.74766800 | 0.85726700  |
| C  | -3.39340600 | -0.95700100 | 0.91375500  |
| C  | -3.23374200 | 0.12868800  | 0.04869200  |
| H  | -4.15785100 | 1.24687800  | -1.53738100 |
| H  | -6.15953300 | -0.17056800 | -1.64983000 |
| H  | -6.41524400 | -2.09400200 | -0.11091200 |
| H  | -4.62755500 | -2.59099700 | 1.53124900  |
| H  | -2.60242000 | -1.19825200 | 1.61503700  |

### IS3'

|    |             |             |             |
|----|-------------|-------------|-------------|
| Pd | -0.75964800 | 0.45373600  | -1.56728700 |
| Pd | 0.62931200  | -0.09059400 | 0.75436800  |
| Pd | -1.82016100 | -1.11612800 | 0.34868200  |
| Pd | 0.28702400  | -1.97454100 | -0.91404400 |
| C  | 0.52128700  | 1.55758600  | -0.57026300 |
| C  | 1.65551200  | 1.84229500  | -1.36386700 |
| C  | 2.20068900  | 3.11328100  | -1.37070100 |
| C  | 1.66695000  | 4.11616600  | -0.56647900 |
| C  | 0.56718600  | 3.84997900  | 0.23449600  |
| C  | -0.01546800 | 2.58843600  | 0.23364800  |
| H  | 2.11099600  | 1.05099200  | -1.94519500 |
| H  | 3.06603800  | 3.31942500  | -1.99119000 |
| H  | 2.11236600  | 5.10447800  | -0.56572300 |
| H  | 0.14400100  | 4.63154400  | 0.85622400  |
| H  | -0.90075600 | 2.40565700  | 0.83162000  |
| C  | 3.22882300  | 0.60071200  | 1.73152000  |
| C  | 4.58298500  | 0.42409100  | 1.99039500  |
| C  | 5.28184500  | -0.61033300 | 1.38431500  |
| C  | 4.62560300  | -1.46944300 | 0.51462700  |
| C  | 3.27074700  | -1.29895300 | 0.25514400  |
| C  | 2.56847900  | -0.27717800 | 0.87873500  |
| H  | 2.69830600  | 1.42873700  | 2.19292900  |
| H  | 5.09320600  | 1.10644400  | 2.66195500  |
| H  | 6.33957600  | -0.74126800 | 1.58274900  |
| H  | 5.16799400  | -2.27518500 | 0.03136500  |
| H  | 2.76450200  | -1.97293100 | -0.43739100 |
| O  | -5.23212900 | 1.19323700  | 1.98215200  |
| H  | -5.54354400 | 2.06721300  | 1.73661300  |
| B  | -4.16069100 | 0.79816800  | 1.23990300  |
| O  | -3.62378100 | -0.45194100 | 1.49897100  |
| H  | -4.05411000 | -0.92714100 | 2.21329500  |
| O  | -3.61333700 | 1.57386600  | 0.27815500  |
| H  | -2.84925000 | 1.13627000  | -0.14950000 |

**TS3'**

|    |             |             |             |
|----|-------------|-------------|-------------|
| Pd | 0.70183600  | 0.07395400  | 1.59989600  |
| Pd | -0.56970400 | -0.03471600 | -0.90499000 |
| Pd | 2.02193900  | -0.81752800 | -0.61079600 |
| Pd | 0.24604700  | -2.25251400 | 0.43947700  |
| C  | -1.30009600 | 0.97435700  | 0.63029100  |
| C  | -1.41343000 | 0.30602700  | 1.88587900  |
| C  | -1.37592300 | 1.05202900  | 3.08626600  |
| C  | -1.26258500 | 2.42768500  | 3.05474600  |
| C  | -1.20356900 | 3.08807700  | 1.82278800  |

|   |             |             |             |
|---|-------------|-------------|-------------|
| C | -1.20062300 | 2.38122300  | 0.63777900  |
| H | -1.73867400 | -0.72901900 | 1.92027500  |
| H | -1.47313400 | 0.52848600  | 4.03075700  |
| H | -1.23777800 | 2.99405400  | 3.97811100  |
| H | -1.14658300 | 4.17082000  | 1.79588000  |
| H | -1.12785100 | 2.91935200  | -0.30002200 |
| C | -3.08087300 | 1.22229000  | -1.75358700 |
| C | -4.37308700 | 1.11768000  | -2.25093300 |
| C | -5.18237800 | 0.05551400  | -1.87549400 |
| C | -4.69051700 | -0.90551800 | -1.00260000 |
| C | -3.39659700 | -0.80786600 | -0.51257300 |
| C | -2.56945300 | 0.24610800  | -0.89847800 |
| H | -2.47313200 | 2.07478200  | -2.03807400 |
| H | -4.75084700 | 1.87744100  | -2.92689300 |
| H | -6.19563300 | -0.01845300 | -2.25362300 |
| H | -5.31836300 | -1.73679800 | -0.69983800 |
| H | -3.02622700 | -1.56619200 | 0.16966000  |
| O | 4.18493800  | 2.73340400  | -2.00153900 |
| H | 4.00762200  | 3.67168700  | -1.90557000 |
| B | 3.24616900  | 1.96257200  | -1.38762200 |
| O | 3.41593600  | 0.58595100  | -1.46600100 |
| H | 4.18919100  | 0.30976800  | -1.96374200 |
| O | 2.19057900  | 2.47800300  | -0.72615000 |
| H | 1.61827400  | 1.78369200  | -0.34882200 |

**FS3'**

|    |             |             |             |
|----|-------------|-------------|-------------|
| Pd | 0.66557900  | -0.74218100 | 1.34478600  |
| Pd | -0.77778900 | 0.36395600  | -0.71450800 |
| Pd | 1.84897700  | -0.47397800 | -1.00682600 |
| Pd | 0.09779300  | -2.22574400 | -0.69482300 |
| C  | -1.70862300 | 0.71642200  | 1.34119800  |
| C  | -1.41167600 | -0.57286100 | 1.92639300  |
| C  | -0.60640700 | -0.69029100 | 3.08952500  |
| C  | 0.06257100  | 0.44606200  | 3.56407200  |
| C  | -0.22545300 | 1.69691900  | 3.00090100  |
| C  | -1.12024700 | 1.84165700  | 1.95855100  |
| H  | -1.97699400 | -1.43312800 | 1.59222000  |
| H  | -0.55944600 | -1.63090200 | 3.62565200  |
| H  | 0.72067200  | 0.37137000  | 4.42053700  |
| H  | 0.24497200  | 2.58090700  | 3.41675400  |
| H  | -1.36730900 | 2.83435600  | 1.60493300  |
| C  | -2.55785700 | 1.94639700  | -0.66311700 |
| C  | -3.45202200 | 2.07825400  | -1.73110500 |
| C  | -4.47527700 | 1.17167500  | -1.91041100 |

|   |             |             |             |
|---|-------------|-------------|-------------|
| C | -4.61786100 | 0.10903000  | -1.01461400 |
| C | -3.73946700 | -0.05471400 | 0.03217600  |
| C | -2.68428600 | 0.85970400  | 0.24340800  |
| H | -1.85142800 | 2.74594000  | -0.46998900 |
| H | -3.33862300 | 2.91549500  | -2.41063000 |
| H | -5.17034900 | 1.28676400  | -2.73358700 |
| H | -5.43110100 | -0.59679100 | -1.14196400 |
| H | -3.87744800 | -0.87869400 | 0.72195400  |
| O | 4.02822400  | 3.31770900  | -0.63149700 |
| H | 3.78055600  | 4.15825200  | -0.24035200 |
| B | 3.02508300  | 2.39884600  | -0.56011400 |
| O | 3.28557000  | 1.14487200  | -1.09774600 |
| H | 4.17461700  | 1.04106300  | -1.44519300 |
| O | 1.82674300  | 2.66476900  | -0.00375600 |
| H | 1.23202800  | 1.88837500  | -0.01454400 |

(13) The optimized structures involved in Suzuki-Miyaura cross-coupling mechanism catalyzed by Pd<sub>12</sub> cluster

### IS1

|    |             |             |             |
|----|-------------|-------------|-------------|
| Pd | -0.13629700 | -3.10898500 | -0.65802700 |
| Pd | -2.30070500 | -1.85578500 | -1.20747100 |
| Pd | -3.37393100 | -0.47117300 | 0.95856400  |
| Pd | -1.70752000 | 1.24000000  | 1.95501500  |
| Pd | -0.92551300 | 3.13187400  | 0.16357700  |
| Pd | 0.17470800  | 2.00515500  | -1.96285800 |
| Pd | 2.42860600  | 0.85310200  | -1.34086700 |
| Pd | 1.81805200  | -1.47002000 | 0.39861200  |
| Pd | 0.18216600  | -0.69643600 | -1.65494500 |
| Pd | -1.85809600 | 0.82561600  | -0.75585800 |
| Pd | -0.82398600 | -1.15534300 | 0.97473700  |
| Pd | 0.77592900  | 1.07353600  | 0.67178100  |
| C  | 3.25591000  | -1.58201900 | 2.10896800  |
| C  | 2.54358100  | -1.67718400 | 3.32099700  |
| C  | 1.86204500  | -0.57989900 | 3.84958300  |
| C  | 1.88781400  | 0.65488000  | 3.19694100  |
| C  | 2.53933300  | 0.81822700  | 1.95174400  |
| C  | 3.21418100  | -0.34157200 | 1.39854800  |
| H  | 3.95231700  | -2.37173100 | 1.81577100  |
| H  | 2.55800700  | -2.62550100 | 3.86347200  |
| H  | 1.33276000  | -0.67859600 | 4.79939900  |
| H  | 1.44792400  | 1.53463800  | 3.67279400  |
| H  | 2.86578500  | 1.81845200  | 1.63868400  |
| Br | 4.58197100  | 0.04220700  | 0.06586300  |

**TS1**

|    |             |             |             |
|----|-------------|-------------|-------------|
| Pd | 0.00790100  | -3.13565400 | -0.51761600 |
| Pd | -2.24043800 | -2.00662700 | -1.00504600 |
| Pd | -3.28708200 | -0.62177000 | 1.12791200  |
| Pd | -1.68608100 | 1.24096600  | 1.95080700  |
| Pd | -1.10591500 | 3.10173000  | 0.02694100  |
| Pd | -0.03426400 | 1.93112100  | -2.09000600 |
| Pd | 2.31036300  | 0.86167500  | -1.50265400 |
| Pd | 1.96340500  | -1.29822300 | 0.34644500  |
| Pd | 0.12529500  | -0.76010900 | -1.67186000 |
| Pd | -1.93267800 | 0.70074200  | -0.72097800 |
| Pd | -0.67196800 | -1.16815000 | 1.06460400  |
| Pd | 0.68800500  | 1.13010100  | 0.51289400  |
| C  | 3.46332800  | -1.13133400 | 2.57662300  |
| C  | 3.18992200  | -0.83212800 | 3.90683800  |
| C  | 2.57425100  | 0.37671600  | 4.26677100  |
| C  | 2.24940300  | 1.30994400  | 3.29213600  |
| C  | 2.48215000  | 1.04262900  | 1.92701200  |
| C  | 3.03530600  | -0.22608500 | 1.57957100  |
| H  | 3.97986500  | -2.05404500 | 2.30271700  |
| H  | 3.46829800  | -1.55208700 | 4.68089300  |
| H  | 2.38886300  | 0.59860400  | 5.31972700  |
| H  | 1.84135600  | 2.28450900  | 3.57174600  |
| H  | 2.52620200  | 1.88802100  | 1.21187800  |
| Br | 4.38709400  | -0.09401000 | -0.23905600 |

**FS1**

|    |             |             |             |
|----|-------------|-------------|-------------|
| Pd | 2.26928600  | -1.56768400 | -0.77527800 |
| Pd | -0.10918900 | -2.28249100 | -1.66234100 |
| Pd | -1.75702200 | -2.96642300 | 0.35694900  |
| Pd | -2.20374100 | -0.88381300 | 1.91518200  |
| Pd | -3.35120000 | 1.14448800  | 0.61815000  |
| Pd | -1.76657500 | 2.01482200  | -1.37152700 |
| Pd | 0.58552000  | 2.87696900  | -0.45071600 |
| Pd | 2.23422600  | 0.83672900  | 0.41260200  |
| Pd | 0.36738000  | 0.37439600  | -1.47456800 |
| Pd | -2.03381400 | -0.60828400 | -0.83639400 |
| Pd | 0.24977700  | -1.24222400 | 0.89025800  |
| Pd | -0.69570700 | 1.25519400  | 1.05295900  |
| C  | 4.42364900  | -0.88251400 | -0.43078800 |
| C  | 5.36018300  | -1.93208000 | -0.28261100 |
| C  | 5.50012900  | -2.58057100 | 0.93412300  |
| C  | 4.72338400  | -2.18416700 | 2.03633800  |
| C  | 3.79117300  | -1.16306000 | 1.91952900  |

|    |            |             |             |
|----|------------|-------------|-------------|
| C  | 3.60349300 | -0.51799000 | 0.67419700  |
| H  | 4.46026300 | -0.25598500 | -1.32829600 |
| H  | 6.00140100 | -2.19718400 | -1.12727600 |
| H  | 6.23263000 | -3.38326700 | 1.04579800  |
| H  | 4.85139300 | -2.68698200 | 2.99856600  |
| H  | 3.19806300 | -0.85779300 | 2.78526400  |
| Br | 2.75865500 | 3.23331900  | 0.78453000  |

## IM

|    |             |             |             |
|----|-------------|-------------|-------------|
| Pd | -2.64580100 | -1.10265600 | 0.30125100  |
| Pd | -0.53294000 | -2.01335200 | 1.64861700  |
| Pd | 1.23086900  | -3.08842600 | -0.07211200 |
| Pd | 2.22164600  | -1.23512100 | -1.67513700 |
| Pd | 3.51791900  | 0.69169800  | -0.33412000 |
| Pd | 1.86507600  | 1.98857500  | 1.30042200  |
| Pd | -0.26613500 | 3.04839800  | 0.07109300  |
| Pd | -2.15557300 | 1.25579400  | -0.76892100 |
| Pd | -0.51900500 | 0.65400300  | 1.26871600  |
| Pd | 1.73815100  | -0.70971400 | 1.00324200  |
| Pd | -0.37229800 | -1.10318100 | -0.97748900 |
| Pd | 0.97983500  | 1.17568300  | -1.14725400 |
| C  | -4.90227000 | 0.98646800  | 0.20274900  |
| C  | -6.10775600 | 0.32596500  | 0.38819400  |
| C  | -6.37726900 | -0.88233900 | -0.27904000 |
| C  | -5.44097800 | -1.41746700 | -1.14829500 |
| C  | -4.20349200 | -0.76501100 | -1.35979700 |
| C  | -3.91627800 | 0.43971000  | -0.65515500 |
| H  | -4.70257300 | 1.92887000  | 0.71826100  |
| H  | -6.85627400 | 0.75170300  | 1.06178600  |
| H  | -7.33455100 | -1.38630300 | -0.12673100 |
| H  | -5.66317100 | -2.33044400 | -1.70686000 |
| H  | -3.56060500 | -1.10182900 | -2.17851600 |
| O  | -2.12620300 | 3.32038100  | -0.90963900 |
| H  | -2.02514600 | 3.61285700  | -1.82495100 |

## IS2

|    |             |             |             |
|----|-------------|-------------|-------------|
| Pd | -1.38049100 | 2.52310000  | -0.30903200 |
| Pd | 1.07805800  | 2.58007700  | -1.22104800 |
| Pd | 2.96800200  | 2.11067800  | 0.75321500  |
| Pd | 2.58363400  | -0.24782600 | 1.79555000  |
| Pd | 2.76736900  | -2.26150600 | 0.01120100  |
| Pd | 1.10530700  | -1.92399500 | -1.97514200 |
| Pd | -1.42481200 | -2.15635500 | -1.32071900 |
| Pd | -2.00601000 | 0.04856200  | 0.57772600  |

|    |             |             |             |
|----|-------------|-------------|-------------|
| Pd | -0.34020500 | 0.31926200  | -1.56234300 |
| Pd | 2.25461700  | 0.16531100  | -0.88222000 |
| Pd | 0.49153500  | 1.21264600  | 1.08550200  |
| Pd | 0.20224000  | -1.53626000 | 0.71742900  |
| C  | -4.18656400 | 1.35704800  | -0.86948300 |
| C  | -5.00930900 | 2.41648800  | -1.22081900 |
| C  | -4.96741700 | 3.62942000  | -0.51034500 |
| C  | -4.11479600 | 3.77118900  | 0.57218400  |
| C  | -3.26753500 | 2.70565600  | 0.95973600  |
| C  | -3.27647800 | 1.50005300  | 0.20377300  |
| H  | -4.24249200 | 0.40520600  | -1.40152400 |
| H  | -5.70243900 | 2.30278700  | -2.05847800 |
| H  | -5.62736700 | 4.45119500  | -0.79804000 |
| H  | -4.11495000 | 4.69245200  | 1.16051800  |
| H  | -2.74276500 | 2.76367900  | 1.91822800  |
| C  | -3.05632600 | -0.71959300 | 2.33929700  |
| C  | -2.10857500 | -0.30874700 | 3.33806300  |
| C  | -0.91230400 | -0.97077500 | 3.49203700  |
| C  | -0.60823300 | -2.10710000 | 2.67180800  |
| C  | -1.54539200 | -2.52997600 | 1.69098600  |
| C  | -2.80338700 | -1.83610700 | 1.49555600  |
| H  | -4.06320000 | -0.29406100 | 2.33743300  |
| H  | -2.35641800 | 0.53031700  | 3.99359100  |
| H  | -0.20557600 | -0.66537000 | 4.26731400  |
| H  | 0.18370600  | -2.78832900 | 3.00000400  |
| H  | -1.46885600 | -3.54011600 | 1.27394300  |
| O  | -4.27906400 | -3.87056200 | 0.96482500  |
| H  | -4.88914100 | -3.85538700 | 1.70658700  |
| B  | -3.97502400 | -2.51258100 | 0.55195500  |
| O  | -3.40658800 | -2.73132000 | -0.86030400 |
| H  | -3.59252800 | -3.65901400 | -1.05615400 |
| O  | -5.08372300 | -1.60203400 | 0.53689100  |
| H  | -5.77524400 | -1.94429100 | -0.03669400 |

**TS2**

|    |             |             |             |
|----|-------------|-------------|-------------|
| Pd | -1.68427400 | 2.42003500  | -0.09018300 |
| Pd | 0.80739200  | 2.82920500  | -0.87030000 |
| Pd | 2.67642300  | 2.23538400  | 1.11905700  |
| Pd | 2.50729700  | -0.25565700 | 1.82180800  |
| Pd | 3.01557100  | -1.96221400 | -0.25400900 |
| Pd | 1.33992200  | -1.55759500 | -2.24210700 |
| Pd | -1.13578400 | -2.00776100 | -1.62904500 |
| Pd | -1.96274900 | -0.20332300 | 0.44279800  |
| Pd | -0.33872100 | 0.55526500  | -1.64561400 |



|    |             |             |             |
|----|-------------|-------------|-------------|
| Pd | 2.19305500  | 0.47321100  | -0.79591700 |
| Pd | 0.29172500  | 1.13084600  | 1.18801300  |
| Pd | 0.39377400  | -1.54796100 | 0.45795400  |
| C  | -4.20043100 | 1.06382100  | -1.04926100 |
| C  | -5.20166600 | 2.00493900  | -1.25338000 |
| C  | -5.43873100 | 3.01882500  | -0.31107100 |
| C  | -4.67748200 | 3.07950100  | 0.84637700  |
| C  | -3.66510200 | 2.12494600  | 1.08980000  |
| C  | -3.40597800 | 1.10755500  | 0.12744100  |
| H  | -4.01236100 | 0.29240700  | -1.80068600 |
| H  | -5.80169000 | 1.96020500  | -2.16611800 |
| H  | -6.22982600 | 3.75148900  | -0.48633700 |
| H  | -4.87884400 | 3.84586600  | 1.59953000  |
| H  | -3.19831500 | 2.08575200  | 2.07856600  |
| C  | -2.58461600 | -1.43578600 | 2.89274500  |
| C  | -1.83710900 | -1.83830200 | 4.00210400  |
| C  | -0.74717200 | -2.69968800 | 3.85188600  |
| C  | -0.43313700 | -3.19940500 | 2.58931600  |
| C  | -1.17437700 | -2.79227500 | 1.45833400  |
| C  | -2.27488900 | -1.87785600 | 1.58802800  |
| H  | -3.44300800 | -0.77333200 | 3.03977500  |
| H  | -2.10131700 | -1.46869600 | 4.99710200  |
| H  | -0.16350200 | -3.00527300 | 4.72360800  |
| H  | 0.35044800  | -3.95333100 | 2.47527600  |
| H  | -1.09042400 | -3.40367600 | 0.54537300  |
| O  | -3.94708600 | -3.88904000 | 0.83400200  |
| H  | -4.59886200 | -3.90465100 | 1.54158300  |
| B  | -3.83784600 | -2.60569200 | 0.31299100  |
| O  | -3.18981200 | -2.64228400 | -0.99815200 |
| H  | -3.37195900 | -3.52509300 | -1.34684100 |
| O  | -4.91235000 | -1.76246900 | 0.53795200  |
| H  | -4.80006300 | -0.89450700 | 0.13696600  |

**FS2**

|    |             |             |             |
|----|-------------|-------------|-------------|
| Pd | 2.00157400  | -2.04099500 | -0.69976800 |
| Pd | -0.27298800 | -1.95838400 | -2.11772800 |
| Pd | -2.30474800 | -2.66045300 | -0.44950200 |
| Pd | -2.47234200 | -0.67486100 | 1.49413100  |
| Pd | -3.29117600 | 1.69347100  | 0.16420800  |
| Pd | -1.27873400 | 2.38744300  | -1.39538500 |
| Pd | 1.20104400  | 2.65518500  | -0.05597400 |
| Pd | 2.20759000  | 0.24465400  | 1.00699000  |
| Pd | 0.61956400  | 0.40276000  | -1.29972900 |
| Pd | -2.05864600 | -0.14625200 | -1.21432500 |

|    |             |             |             |
|----|-------------|-------------|-------------|
| Pd | -0.16068000 | -1.48389600 | 0.60548300  |
| Pd | -0.73577000 | 1.31600800  | 1.02644900  |
| C  | 4.69910300  | -0.94889300 | 0.45294600  |
| C  | 5.65670100  | -1.91685700 | 0.17683000  |
| C  | 5.37323000  | -3.27601900 | 0.38001800  |
| C  | 4.13574700  | -3.65634100 | 0.87650600  |
| C  | 3.15198800  | -2.68594200 | 1.17697900  |
| C  | 3.42128900  | -1.31179900 | 0.95300200  |
| H  | 4.94284200  | 0.10696400  | 0.29357900  |
| H  | 6.63740500  | -1.61352600 | -0.19879600 |
| H  | 6.13107100  | -4.03141600 | 0.15926500  |
| H  | 3.91577400  | -4.71053700 | 1.06353600  |
| H  | 2.25851200  | -3.00391600 | 1.72072900  |
| C  | 0.22103100  | -1.26751100 | 2.70195600  |
| C  | -1.13325600 | -1.20874800 | 3.21147800  |
| C  | -1.77879400 | 0.05141900  | 3.38967900  |
| C  | -1.00786700 | 1.26697900  | 3.20968300  |
| C  | 0.37196900  | 1.20032700  | 2.86754200  |
| C  | 0.95172400  | -0.05192500 | 2.47377800  |
| H  | 0.77079800  | -2.20771200 | 2.82787000  |
| H  | -1.55853400 | -2.11075800 | 3.65961200  |
| H  | -2.69159400 | 0.11410800  | 3.99146400  |
| H  | -1.42103300 | 2.20484700  | 3.58957900  |
| H  | 1.00099100  | 2.08733600  | 2.97576700  |
| O  | 5.30271500  | 3.88501500  | -1.23966300 |
| H  | 6.16840500  | 3.68281300  | -0.87081100 |
| B  | 4.29237800  | 3.37541600  | -0.49371700 |
| O  | 2.99516900  | 3.60425600  | -0.92610600 |
| H  | 2.93961500  | 4.04738000  | -1.77991500 |
| O  | 4.51002200  | 2.66808800  | 0.63923300  |
| H  | 3.68778200  | 2.33502200  | 1.04347300  |

### IS3

|    |             |             |             |
|----|-------------|-------------|-------------|
| Pd | 1.61032200  | -2.40255500 | -0.31052300 |
| Pd | -0.83072800 | -2.39434600 | -1.43376700 |
| Pd | -2.73884100 | -2.29422400 | 0.47240200  |
| Pd | -2.54994500 | -0.02759200 | 1.84639800  |
| Pd | -2.91303000 | 2.10551600  | 0.31449900  |
| Pd | -1.03729700 | 2.23272300  | -1.58694400 |
| Pd | 1.41852800  | 2.41198600  | -0.63351300 |
| Pd | 2.24166300  | 0.06724500  | 0.57704800  |
| Pd | 0.45808100  | -0.03167000 | -1.42535800 |
| Pd | -2.15107800 | -0.11667200 | -0.90239500 |
| Pd | -0.29933200 | -1.31811100 | 1.04902300  |

|    |             |             |             |
|----|-------------|-------------|-------------|
| Pd | -0.38201600 | 1.35573100  | 0.94070000  |
| C  | 4.57427100  | -1.51742700 | -0.39955100 |
| C  | 5.32208700  | -2.67681000 | -0.54582500 |
| C  | 5.03111800  | -3.82063000 | 0.21770900  |
| C  | 3.99846700  | -3.78755900 | 1.14038500  |
| C  | 3.23238900  | -2.61071300 | 1.31424400  |
| C  | 3.50513700  | -1.45056300 | 0.53130500  |
| H  | 4.81530100  | -0.64050700 | -1.00500700 |
| H  | 6.14435400  | -2.70123800 | -1.26614900 |
| H  | 5.62701100  | -4.72774000 | 0.09163900  |
| H  | 3.78474100  | -4.66004000 | 1.76344000  |
| H  | 2.54225700  | -2.55752000 | 2.16203600  |
| C  | 3.68412900  | 2.43185200  | -0.38662100 |
| C  | 3.21648400  | 1.76120500  | 0.78019400  |
| C  | 3.27303300  | 2.45677000  | 2.01461800  |
| C  | 3.74842900  | 3.75949300  | 2.07522400  |
| C  | 4.17359200  | 4.42429300  | 0.91324800  |
| C  | 4.14841200  | 3.76603700  | -0.30664600 |
| H  | 3.84290700  | 1.87466300  | -1.31755300 |
| H  | 2.94406000  | 1.95896500  | 2.92988900  |
| H  | 3.78704300  | 4.27539300  | 3.03850900  |
| H  | 4.53942700  | 5.45200400  | 0.97481700  |
| H  | 4.51648400  | 4.26080300  | -1.20950100 |

### TS3

|    |             |             |             |
|----|-------------|-------------|-------------|
| Pd | -1.52076200 | 2.30494400  | -0.60133400 |
| Pd | 1.00416900  | 2.34243100  | -1.45795100 |
| Pd | 2.89623000  | 2.20311700  | 0.42661200  |
| Pd | 2.56320500  | -0.00016700 | 1.86527900  |
| Pd | 2.89620300  | -2.20320200 | 0.42586300  |
| Pd | 1.00425700  | -2.34173000 | -1.45891300 |
| Pd | -1.52027300 | -2.30451900 | -0.60173300 |
| Pd | -2.06339600 | 0.00016800  | 0.87635900  |
| Pd | -0.40131600 | 0.00040900  | -1.34854100 |
| Pd | 2.21854100  | 0.00021300  | -0.87781700 |
| Pd | 0.37592500  | 1.35887600  | 1.00400300  |
| Pd | 0.37566800  | -1.35915200 | 1.00320600  |
| C  | -4.33254800 | -1.72173100 | 1.67823900  |
| C  | -4.96994800 | -2.94956200 | 1.52016000  |
| C  | -4.98927900 | -3.59182000 | 0.27604300  |
| C  | -4.40098600 | -2.97956900 | -0.82509400 |
| C  | -3.75453200 | -1.73213300 | -0.68327300 |
| C  | -3.68840100 | -1.10388400 | 0.59150200  |
| H  | -4.32248600 | -1.24384300 | 2.66129300  |

|   |             |             |             |
|---|-------------|-------------|-------------|
| H | -5.45332700 | -3.42015200 | 2.38061000  |
| H | -5.48713100 | -4.55792200 | 0.16560900  |
| H | -4.46299300 | -3.44306100 | -1.81346800 |
| H | -3.47629700 | -1.17146400 | -1.58527900 |
| C | -4.33493100 | 1.72015800  | 1.67723400  |
| C | -3.68904200 | 1.10312000  | 0.59115200  |
| C | -3.75441600 | 1.73144800  | -0.68357200 |
| C | -4.40205500 | 2.97817500  | -0.82596600 |
| C | -4.99235600 | 3.58954600  | 0.27451800  |
| C | -4.97364900 | 2.94718500  | 1.51854700  |
| H | -4.32537100 | 1.24220500  | 2.66020900  |
| H | -3.47485300 | 1.17107100  | -1.58525000 |
| H | -4.46344000 | 3.44172300  | -1.81429900 |
| H | -5.49135500 | 4.55497500  | 0.16360300  |
| H | -5.45865200 | 3.41703300  | 2.37843700  |

### FS3

|    |             |             |             |
|----|-------------|-------------|-------------|
| Pd | -1.69615300 | 2.22307700  | -0.74465400 |
| Pd | 0.90578500  | 2.25980300  | -1.51350600 |
| Pd | 2.83428800  | 2.22774400  | 0.32590900  |
| Pd | 2.54564300  | 0.11812900  | 1.80990800  |
| Pd | 2.79521000  | -2.27739100 | 0.34398200  |
| Pd | 0.89420900  | -2.39676000 | -1.41608000 |
| Pd | -1.69204400 | -2.23589000 | -0.59993000 |
| Pd | -1.92488200 | 0.03277200  | 1.01247000  |
| Pd | -0.44149200 | -0.02282900 | -1.30321700 |
| Pd | 2.15135800  | -0.06825000 | -0.85726800 |
| Pd | 0.29591000  | 1.47640200  | 1.02886600  |
| Pd | 0.34248100  | -1.36497700 | 1.07651200  |
| C  | -4.17104500 | -1.47044300 | 1.66892200  |
| C  | -4.17828700 | -2.86196100 | 1.66572300  |
| C  | -3.97814700 | -3.58830600 | 0.48618000  |
| C  | -3.79666600 | -2.91053300 | -0.73193000 |
| C  | -3.69562800 | -1.48994100 | -0.73895400 |
| C  | -3.90462400 | -0.72572400 | 0.48278400  |
| H  | -4.40635000 | -0.94975300 | 2.59723900  |
| H  | -4.35647300 | -3.39353200 | 2.60303500  |
| H  | -4.01642900 | -4.67961100 | 0.49923400  |
| H  | -3.85414400 | -3.45556900 | -1.67808200 |
| H  | -3.75494600 | -0.96922600 | -1.69701600 |
| C  | -4.03513000 | 1.50852900  | 1.67963300  |
| C  | -3.88138300 | 0.75502400  | 0.47657000  |
| C  | -3.72289800 | 1.51302800  | -0.75694500 |
| C  | -3.78878700 | 2.93550200  | -0.74608000 |

|   |             |            |             |
|---|-------------|------------|-------------|
| C | -3.86781000 | 3.61960600 | 0.48047300  |
| C | -4.00120300 | 2.90186400 | 1.67323500  |
| H | -4.22747200 | 0.99777100 | 2.62326800  |
| H | -3.86326600 | 0.99460800 | -1.70789400 |
| H | -3.89816500 | 3.48122800 | -1.68731400 |
| H | -3.87600500 | 4.71158000 | 0.49209000  |
| H | -4.09147900 | 3.43841100 | 2.62012700  |

### IS3'

|    |             |             |             |
|----|-------------|-------------|-------------|
| Pd | -1.78475500 | -2.16709200 | -0.04249100 |
| Pd | 0.63007400  | -2.53109700 | 1.08741500  |
| Pd | 2.58184600  | -2.41803900 | -0.71647000 |
| Pd | 2.70691700  | -0.01889000 | -1.91743500 |
| Pd | 3.12738800  | 1.93153400  | -0.15501800 |
| Pd | 1.19469200  | 2.05377100  | 1.67343900  |
| Pd | -1.21075500 | 2.53416200  | 0.61074000  |
| Pd | -2.17545300 | 0.40874000  | -0.77447900 |
| Pd | -0.42258300 | -0.05169400 | 1.22752800  |
| Pd | 2.19592900  | -0.32349400 | 0.81331000  |
| Pd | 0.28594500  | -1.10796000 | -1.28410700 |
| Pd | 0.58894000  | 1.43528600  | -0.97239300 |
| C  | -2.80044700 | 3.01633700  | -2.10856300 |
| C  | -3.12631400 | 4.36455300  | -2.08392300 |
| C  | -3.58356100 | 4.97251600  | -0.90189500 |
| C  | -3.74270300 | 4.21470100  | 0.24779200  |
| C  | -3.43171800 | 2.83386000  | 0.24044000  |
| C  | -2.93135900 | 2.21546800  | -0.94447800 |
| H  | -2.44215500 | 2.56276300  | -3.03565800 |
| H  | -3.01989200 | 4.96283400  | -2.99299900 |
| H  | -3.83110200 | 6.03677600  | -0.89631800 |
| H  | -4.14117900 | 4.67003700  | 1.15856000  |
| H  | -3.73792300 | 2.22071300  | 1.09545600  |
| C  | -3.37824500 | -1.53209000 | -2.70867900 |
| C  | -3.34829300 | -1.05030000 | -1.37503200 |
| C  | -4.00532700 | -1.82232500 | -0.37001900 |
| C  | -4.62264900 | -3.05101500 | -0.70339400 |
| C  | -4.61719200 | -3.50224700 | -2.01482100 |
| C  | -4.00782700 | -2.73007800 | -3.01789500 |
| H  | -2.90220300 | -0.95065700 | -3.50171500 |
| H  | -4.18155400 | -1.39881700 | 0.62483500  |
| H  | -5.13111300 | -3.62393900 | 0.07677900  |
| H  | -5.10058300 | -4.44786200 | -2.27179300 |
| H  | -4.02122000 | -3.08127000 | -4.05336000 |
| O  | -1.90037400 | -1.33602900 | 5.37885100  |

|   |             |             |            |
|---|-------------|-------------|------------|
| H | -2.20969300 | -2.18435600 | 5.71226000 |
| B | -1.72444000 | -1.35762900 | 4.03135100 |
| O | -1.27400700 | -0.20405000 | 3.41597600 |
| H | -1.08858800 | 0.51681600  | 4.02725100 |
| O | -1.98130200 | -2.46288700 | 3.29254800 |
| H | -1.78785400 | -2.32794700 | 2.34191200 |

**TS3'**

|    |             |             |             |
|----|-------------|-------------|-------------|
| Pd | -1.58191900 | -2.22196900 | -0.09493500 |
| Pd | 0.89737700  | -2.51702000 | 0.91050500  |
| Pd | 2.90173700  | -2.14020900 | -0.79874400 |
| Pd | 2.76602200  | 0.28349500  | -1.88016800 |
| Pd | 3.04839100  | 2.19113300  | -0.06929800 |
| Pd | 1.03401800  | 2.13643700  | 1.67521600  |
| Pd | -1.43031300 | 2.32542300  | 0.67231600  |
| Pd | -1.95390900 | 0.33349800  | -1.23630000 |
| Pd | -0.43509600 | -0.10078200 | 1.08596900  |
| Pd | 2.22086900  | -0.15548200 | 0.80535000  |
| Pd | 0.46578900  | -1.06634200 | -1.37760500 |
| Pd | 0.54169000  | 1.54996200  | -0.95576400 |
| C  | -4.15252800 | 2.23348900  | -1.78592400 |
| C  | -4.77643900 | 3.42618100  | -1.42984000 |
| C  | -4.83737500 | 3.83172900  | -0.09072100 |
| C  | -4.30596900 | 3.01492400  | 0.90095100  |
| C  | -3.67170300 | 1.80090400  | 0.55719100  |
| C  | -3.55996600 | 1.41450000  | -0.80773600 |
| H  | -4.10992900 | 1.94160500  | -2.83837900 |
| H  | -5.21684200 | 4.05651400  | -2.20716500 |
| H  | -5.32469300 | 4.77248500  | 0.17556700  |
| H  | -4.40384200 | 3.29081500  | 1.95448600  |
| H  | -3.44104700 | 1.07895700  | 1.35137000  |
| C  | -4.19349800 | -1.21739900 | -2.36990100 |
| C  | -3.60437500 | -0.76588200 | -1.17563900 |
| C  | -3.75406900 | -1.55981700 | -0.00294600 |
| C  | -4.40822100 | -2.81024400 | -0.07245900 |
| C  | -4.93216000 | -3.25889900 | -1.28120700 |
| C  | -4.84425900 | -2.44851600 | -2.41911800 |
| H  | -4.12418300 | -0.60896800 | -3.27534900 |
| H  | -3.54161600 | -1.12495900 | 0.98163900  |
| H  | -4.53268500 | -3.40297300 | 0.83787900  |
| H  | -5.43500800 | -4.22719400 | -1.33489500 |
| H  | -5.28020800 | -2.78962600 | -3.36201800 |
| O  | -1.10307200 | -1.72375400 | 5.28480300  |
| H  | -1.12695800 | -2.62489000 | 5.62238200  |

|   |             |             |            |
|---|-------------|-------------|------------|
| B | -1.19460600 | -1.68901300 | 3.92945200 |
| O | -1.15968300 | -0.45283700 | 3.30844900 |
| H | -0.99558500 | 0.27516400  | 3.91786000 |
| O | -1.33124700 | -2.81754100 | 3.19241300 |
| H | -1.33321400 | -2.63928400 | 2.22729700 |

**FS3'**

|    |             |             |             |
|----|-------------|-------------|-------------|
| Pd | -1.57500400 | -2.35198500 | 0.23548900  |
| Pd | 1.02234300  | -2.30970300 | 1.10737400  |
| Pd | 2.88520100  | -1.98448600 | -0.75204500 |
| Pd | 2.66101300  | 0.28636900  | -1.95967700 |
| Pd | 2.69046900  | 2.52585700  | -0.26209900 |
| Pd | 0.78056600  | 2.35808400  | 1.46413000  |
| Pd | -1.79274600 | 2.18853400  | 0.59011200  |
| Pd | -1.89641200 | 0.08082600  | -1.27829600 |
| Pd | -0.52295600 | -0.03996500 | 1.13298700  |
| Pd | 2.11283300  | 0.13370800  | 0.69627200  |
| Pd | 0.40752500  | -1.19531700 | -1.33254800 |
| Pd | 0.31987600  | 1.51904300  | -1.11694000 |
| C  | -4.67504900 | 1.56009500  | -1.36568000 |
| C  | -4.85204000 | 2.90983100  | -1.04765300 |
| C  | -4.46892200 | 3.41271900  | 0.19177600  |
| C  | -3.92659600 | 2.54208200  | 1.16004400  |
| C  | -3.71827800 | 1.17367200  | 0.84017100  |
| C  | -4.08078600 | 0.66298400  | -0.45966300 |
| H  | -5.02069600 | 1.19644900  | -2.33473100 |
| H  | -5.30950100 | 3.57435100  | -1.78438100 |
| H  | -4.62661200 | 4.46546100  | 0.43585400  |
| H  | -3.82330100 | 2.87771300  | 2.19604400  |
| H  | -3.49168900 | 0.46576800  | 1.64173400  |
| C  | -3.76662400 | -1.17577500 | -2.17383100 |
| C  | -3.81602500 | -0.75700500 | -0.81213500 |
| C  | -3.66743600 | -1.78542000 | 0.20453900  |
| C  | -3.57710400 | -3.15545200 | -0.16717900 |
| C  | -3.53185800 | -3.51572000 | -1.53731400 |
| C  | -3.62015200 | -2.53593400 | -2.51323900 |
| H  | -3.97167400 | -0.46189600 | -2.97413900 |
| H  | -3.94051200 | -1.53470900 | 1.23290200  |
| H  | -3.72533200 | -3.93159200 | 0.58960700  |
| H  | -3.45512100 | -4.56894200 | -1.81541700 |
| H  | -3.59154400 | -2.81385400 | -3.56925000 |
| O  | 1.19801900  | -1.28797200 | 4.40412500  |
| H  | 1.90150300  | -1.92120700 | 4.22785900  |
| B  | 0.04243600  | -1.57930100 | 3.75604800  |

|   |             |             |            |
|---|-------------|-------------|------------|
| O | -1.03397200 | -0.74279300 | 3.83953600 |
| H | -0.81942100 | 0.07258100  | 4.30587100 |
| O | -0.09408300 | -2.77203400 | 3.05751000 |
| H | -0.95736100 | -2.82200500 | 2.60046700 |
